# Supplementary material
Source: ML conference proceedings conference paper supplement (https://www.ecva.net/papers/eccv_2022/papers_ECCV/html/136910649_ECCV_2022_paper.php)

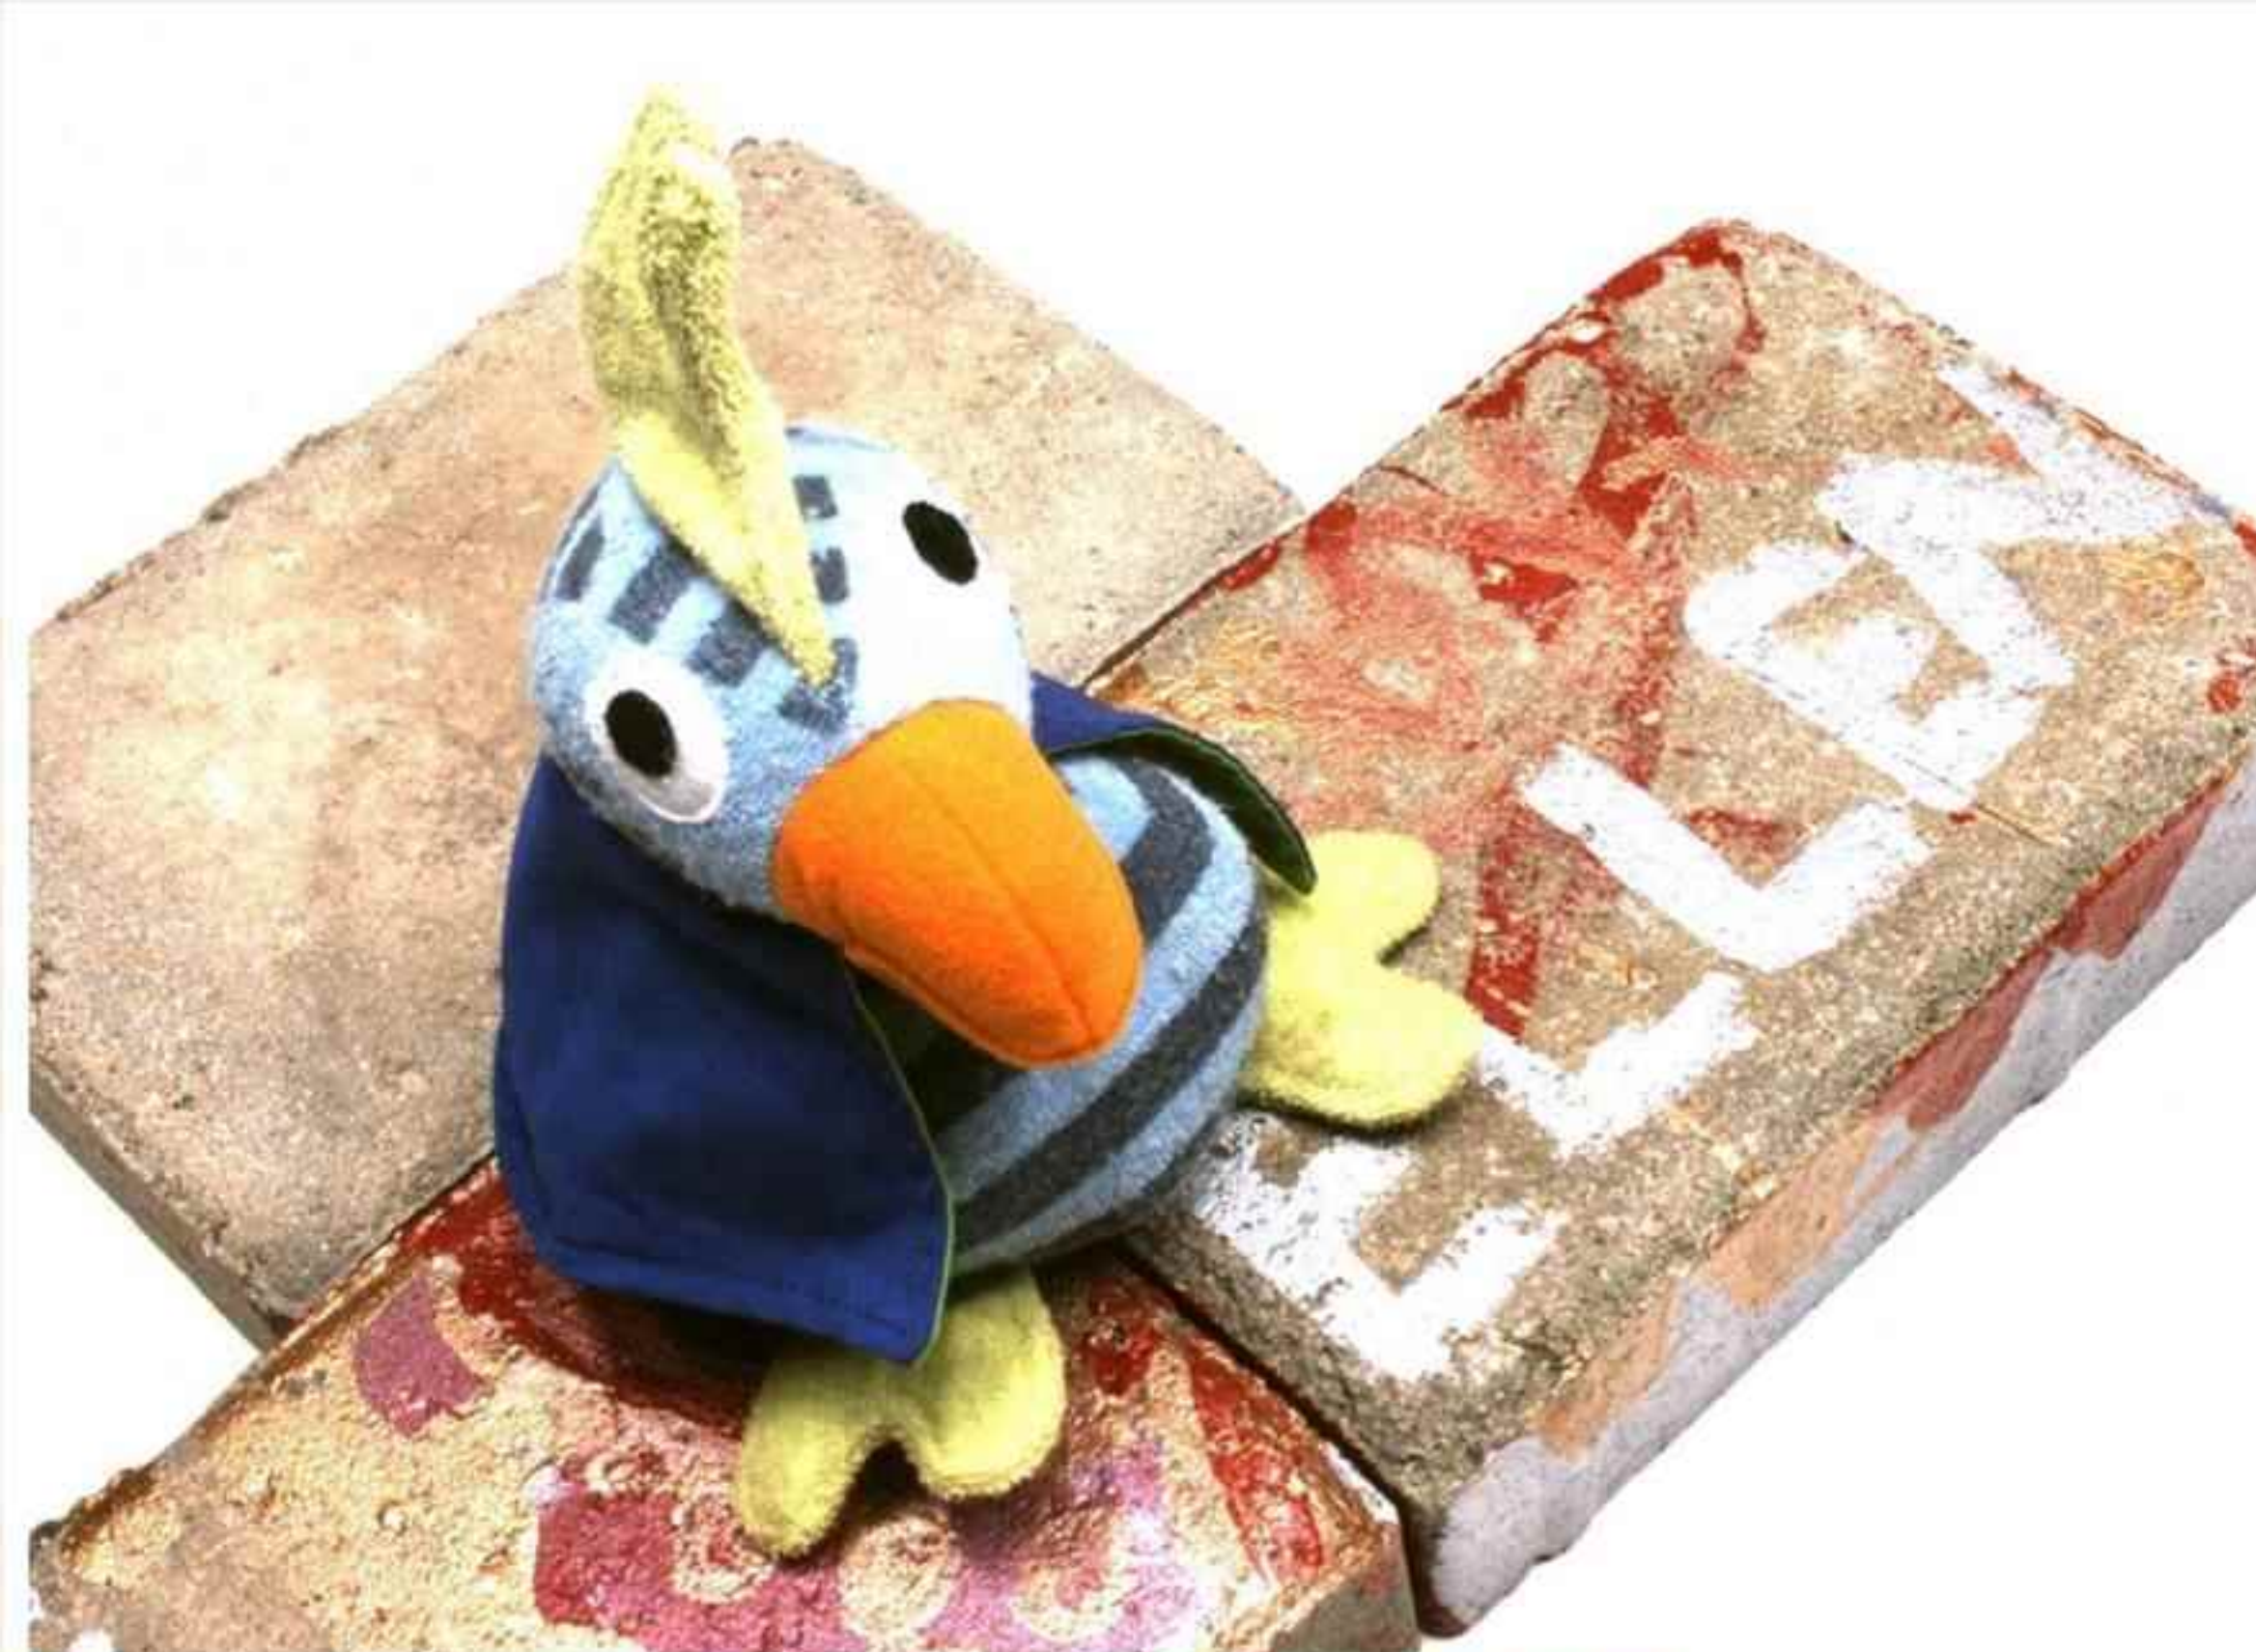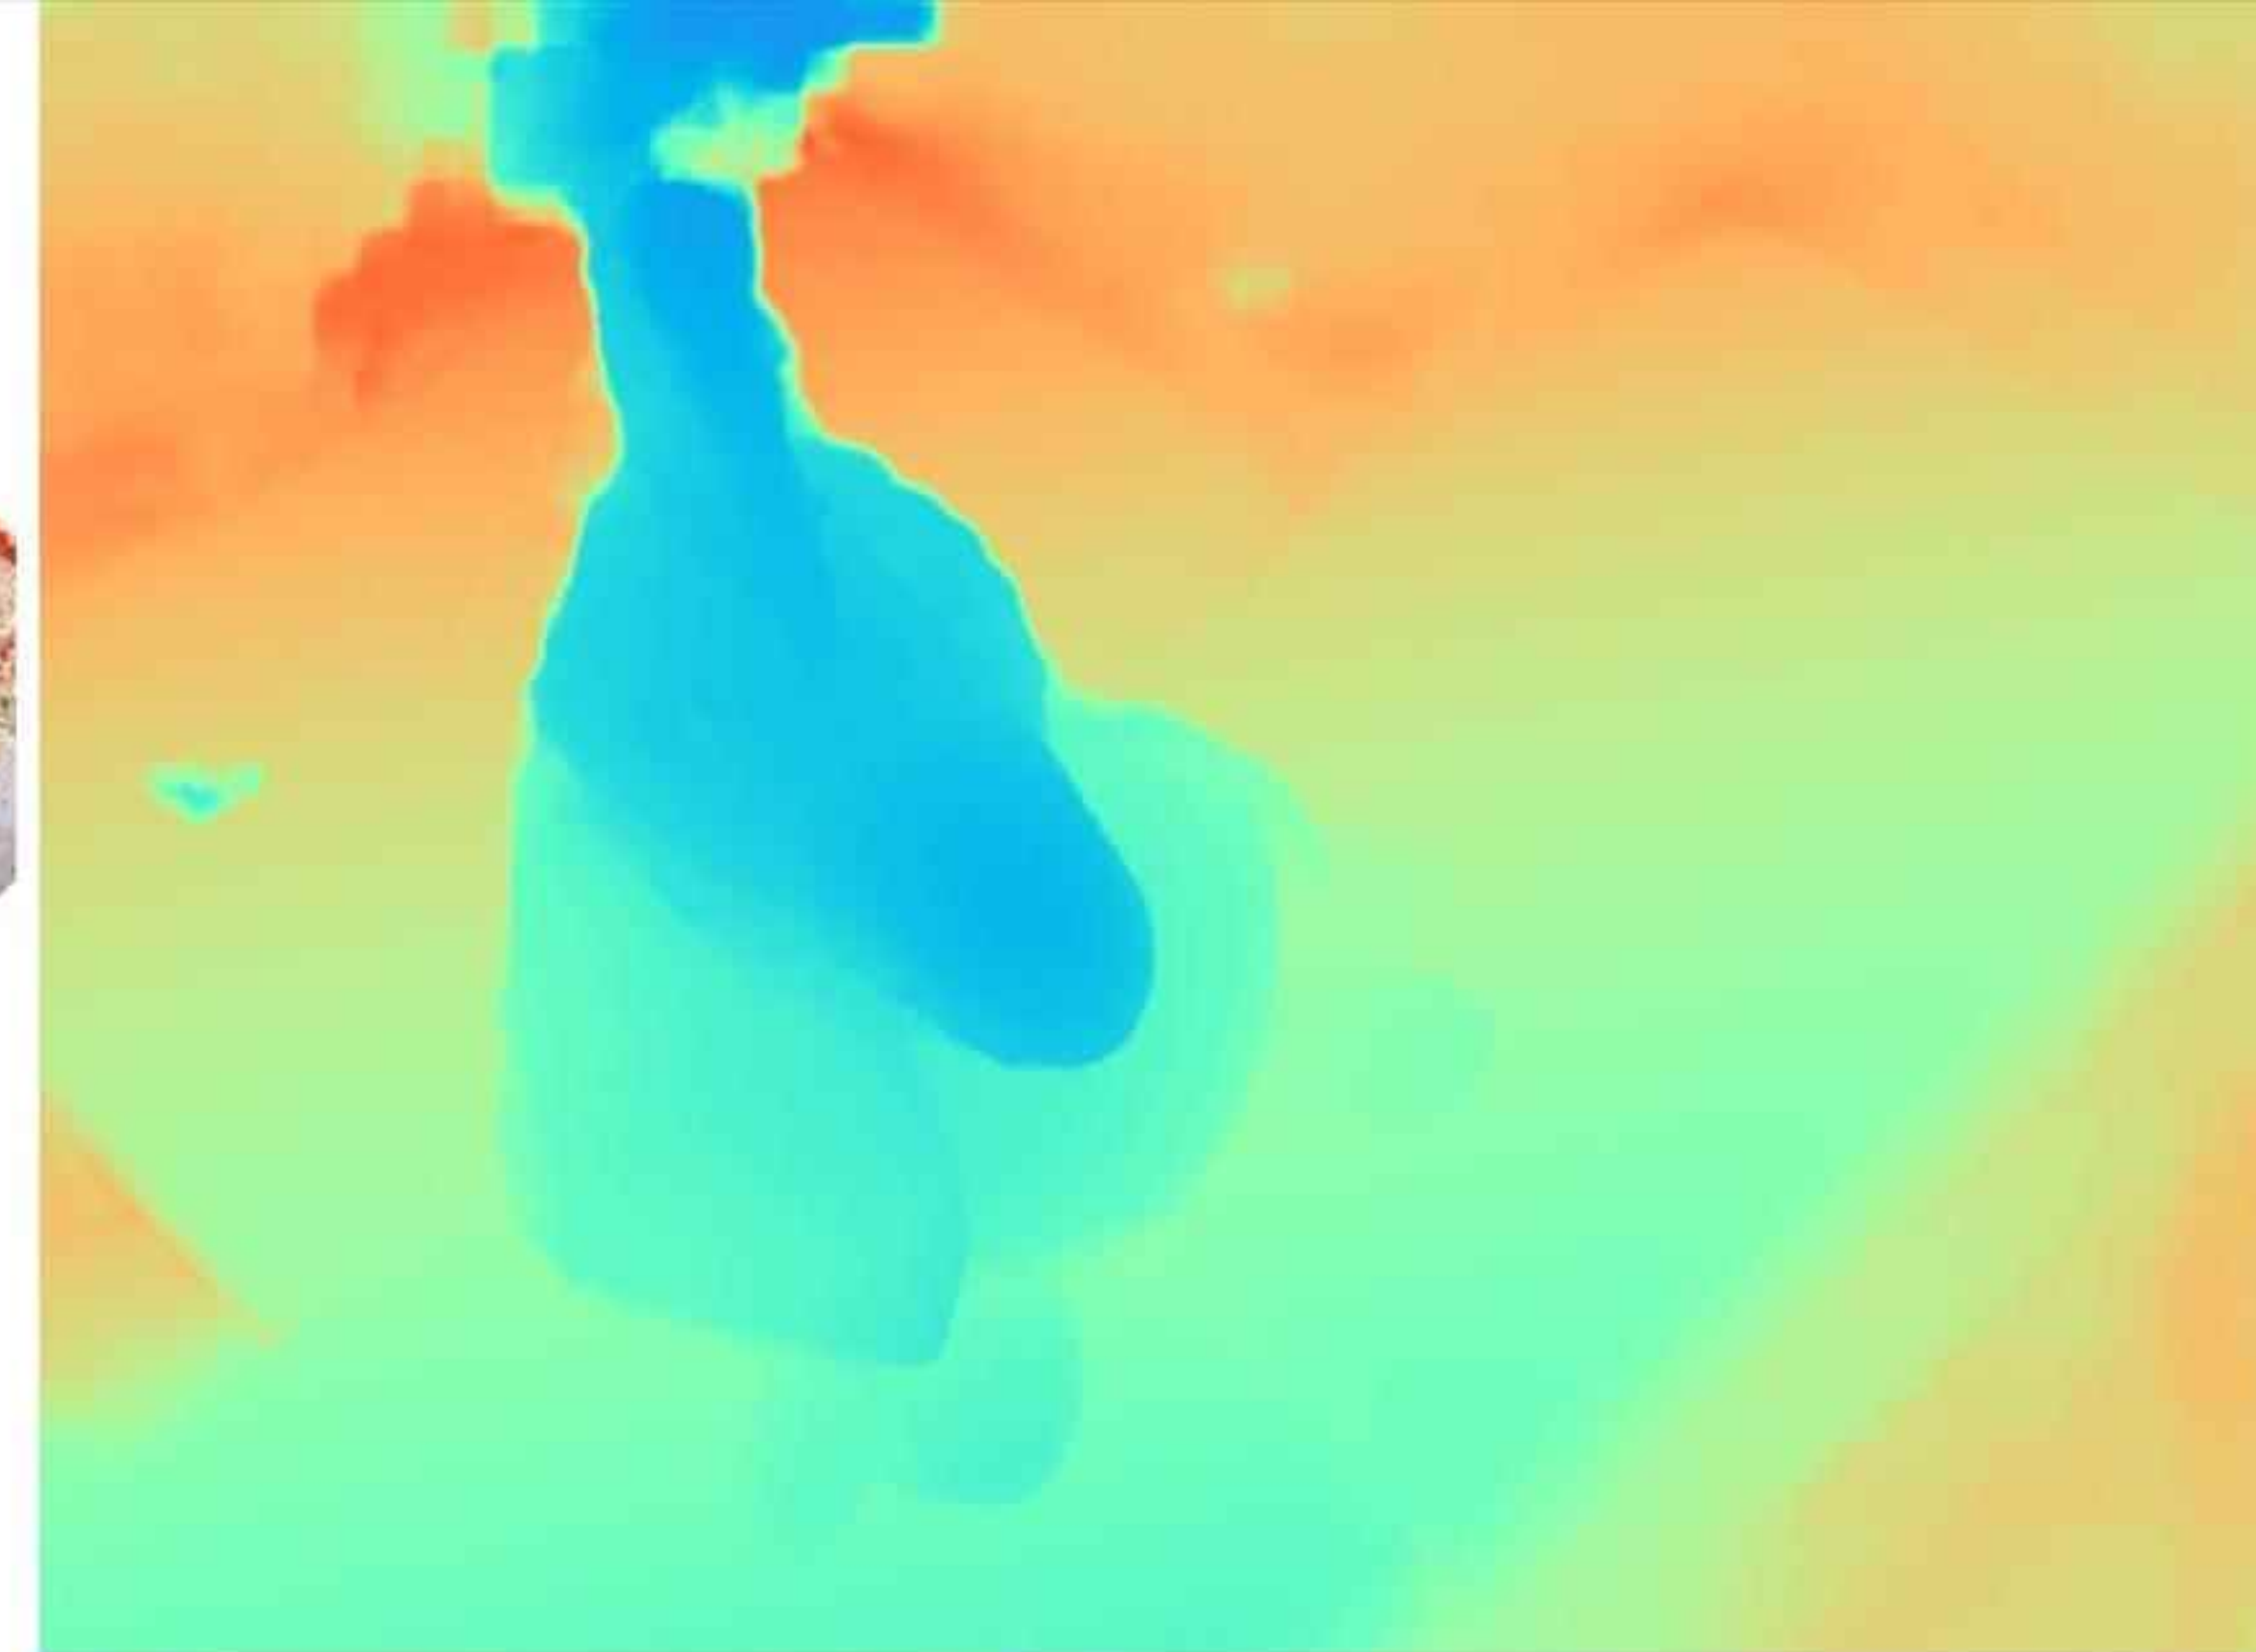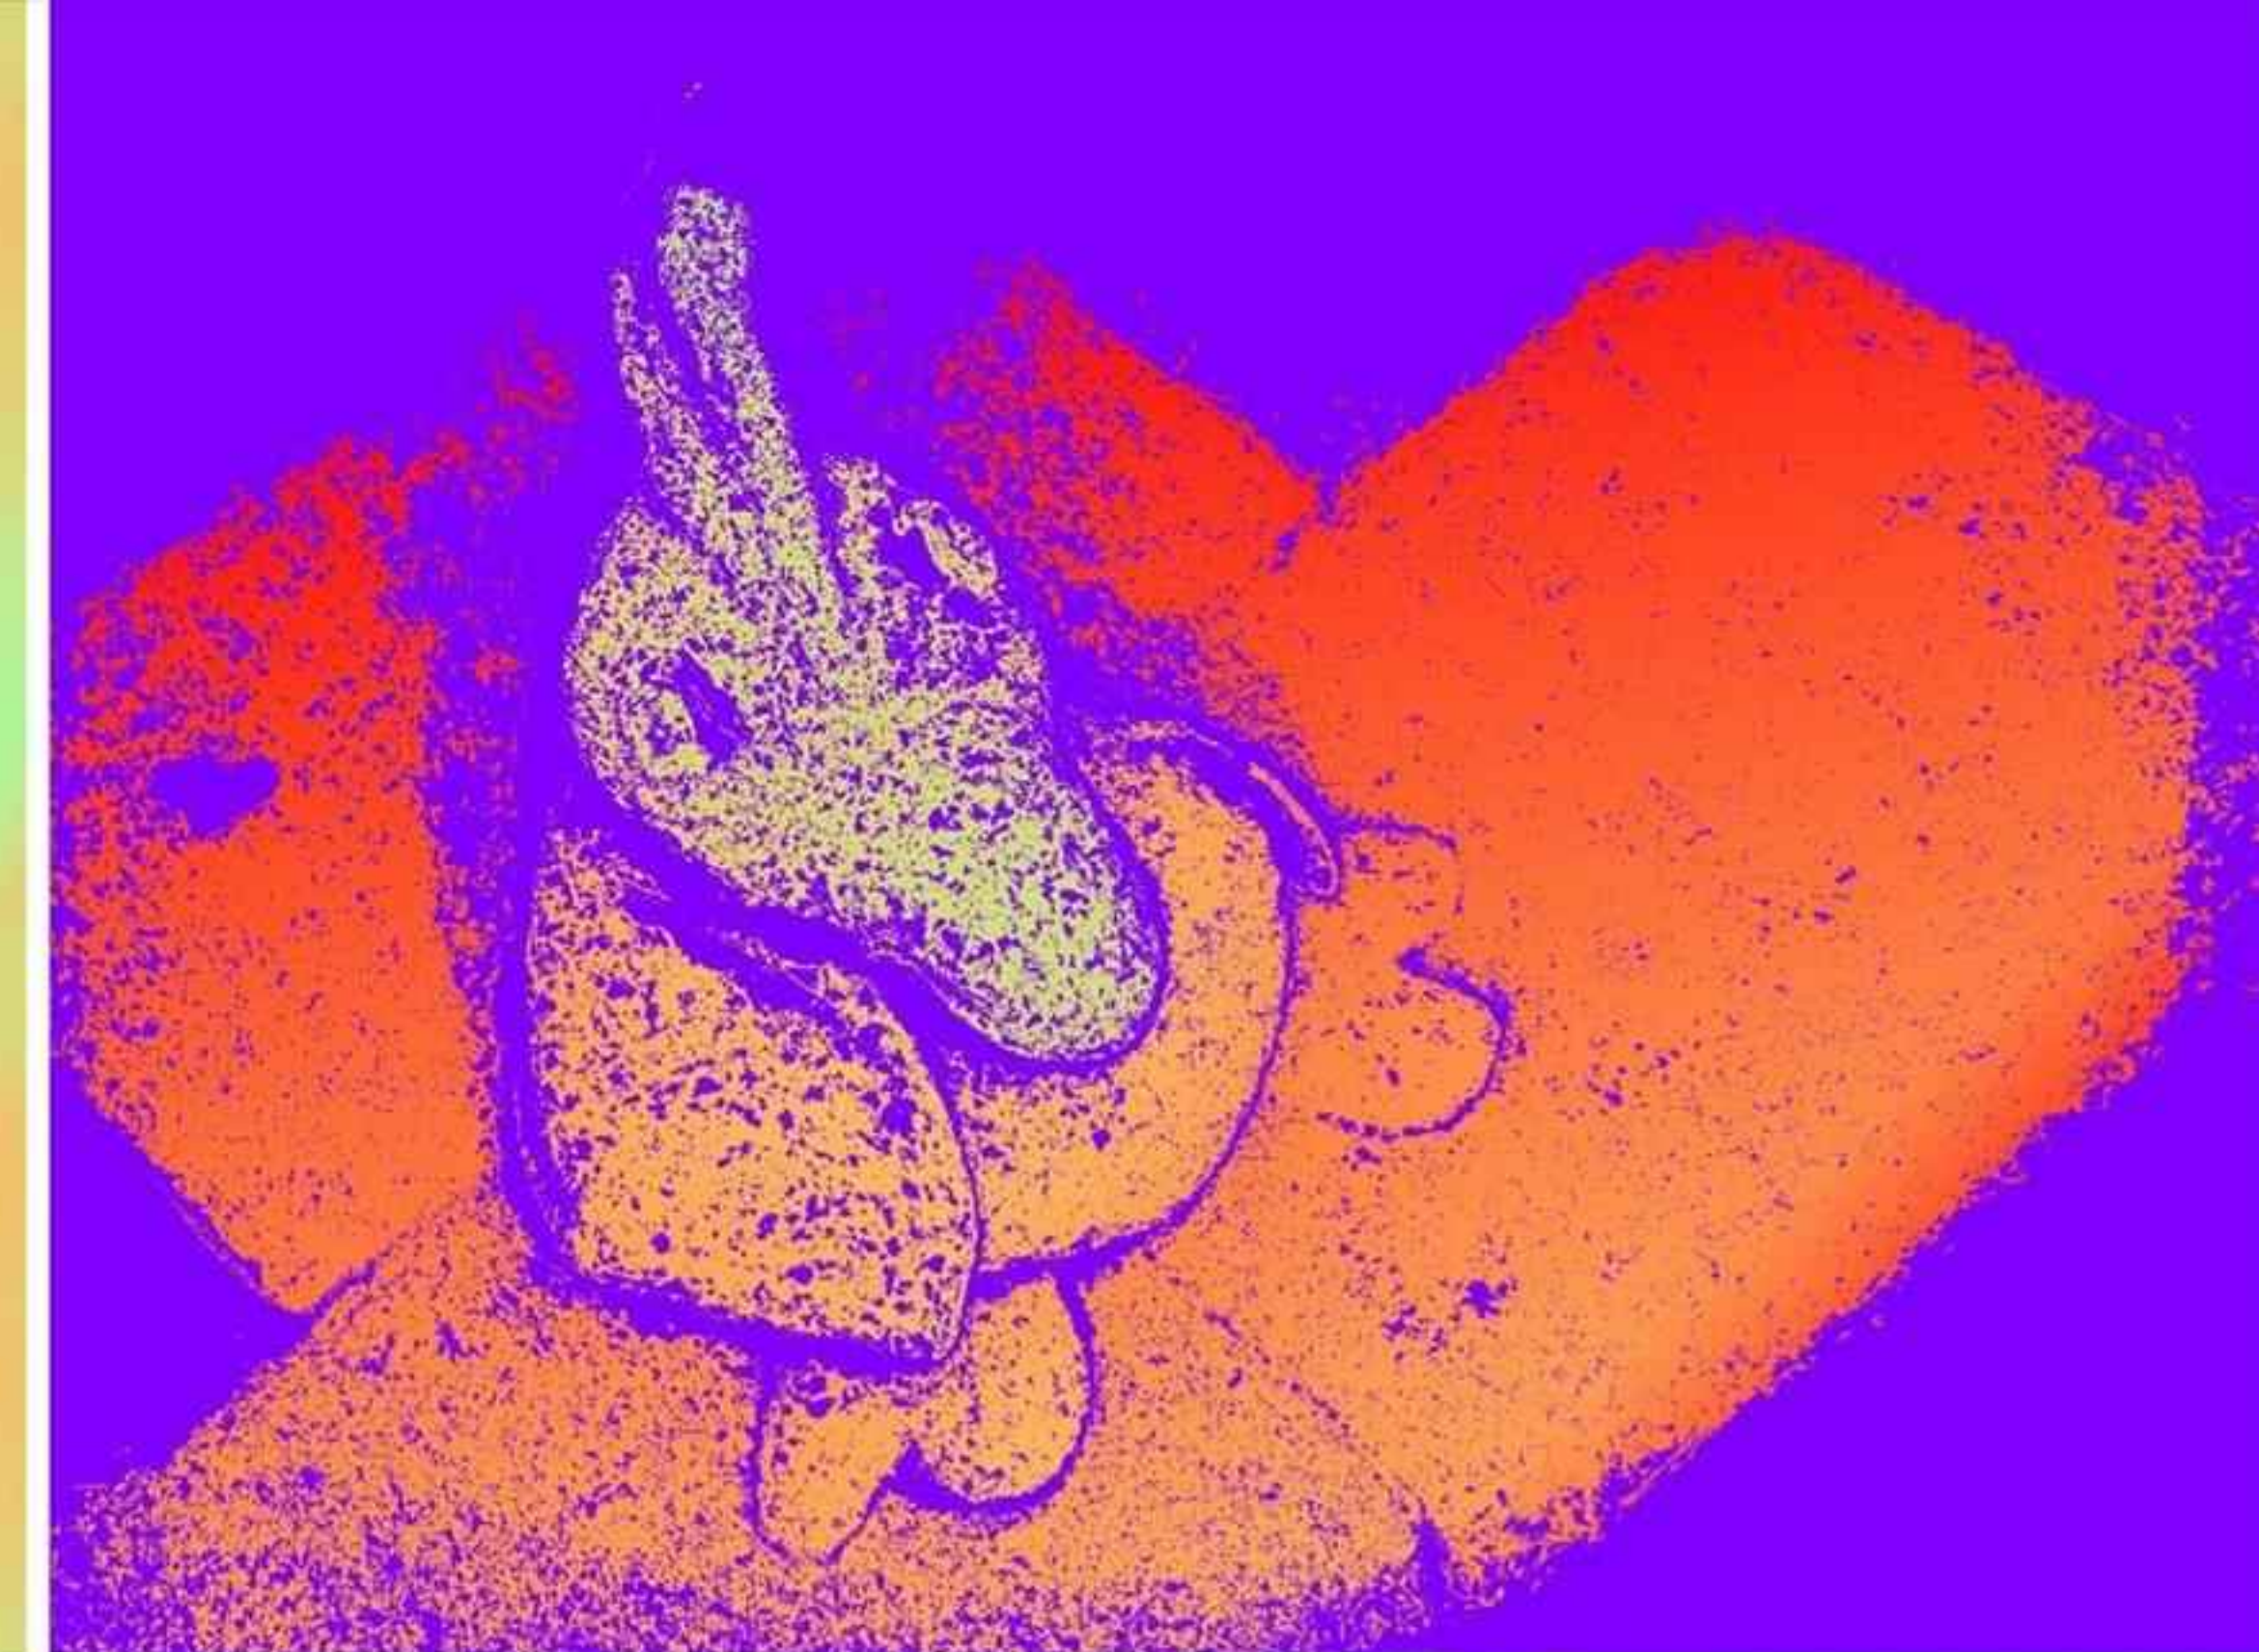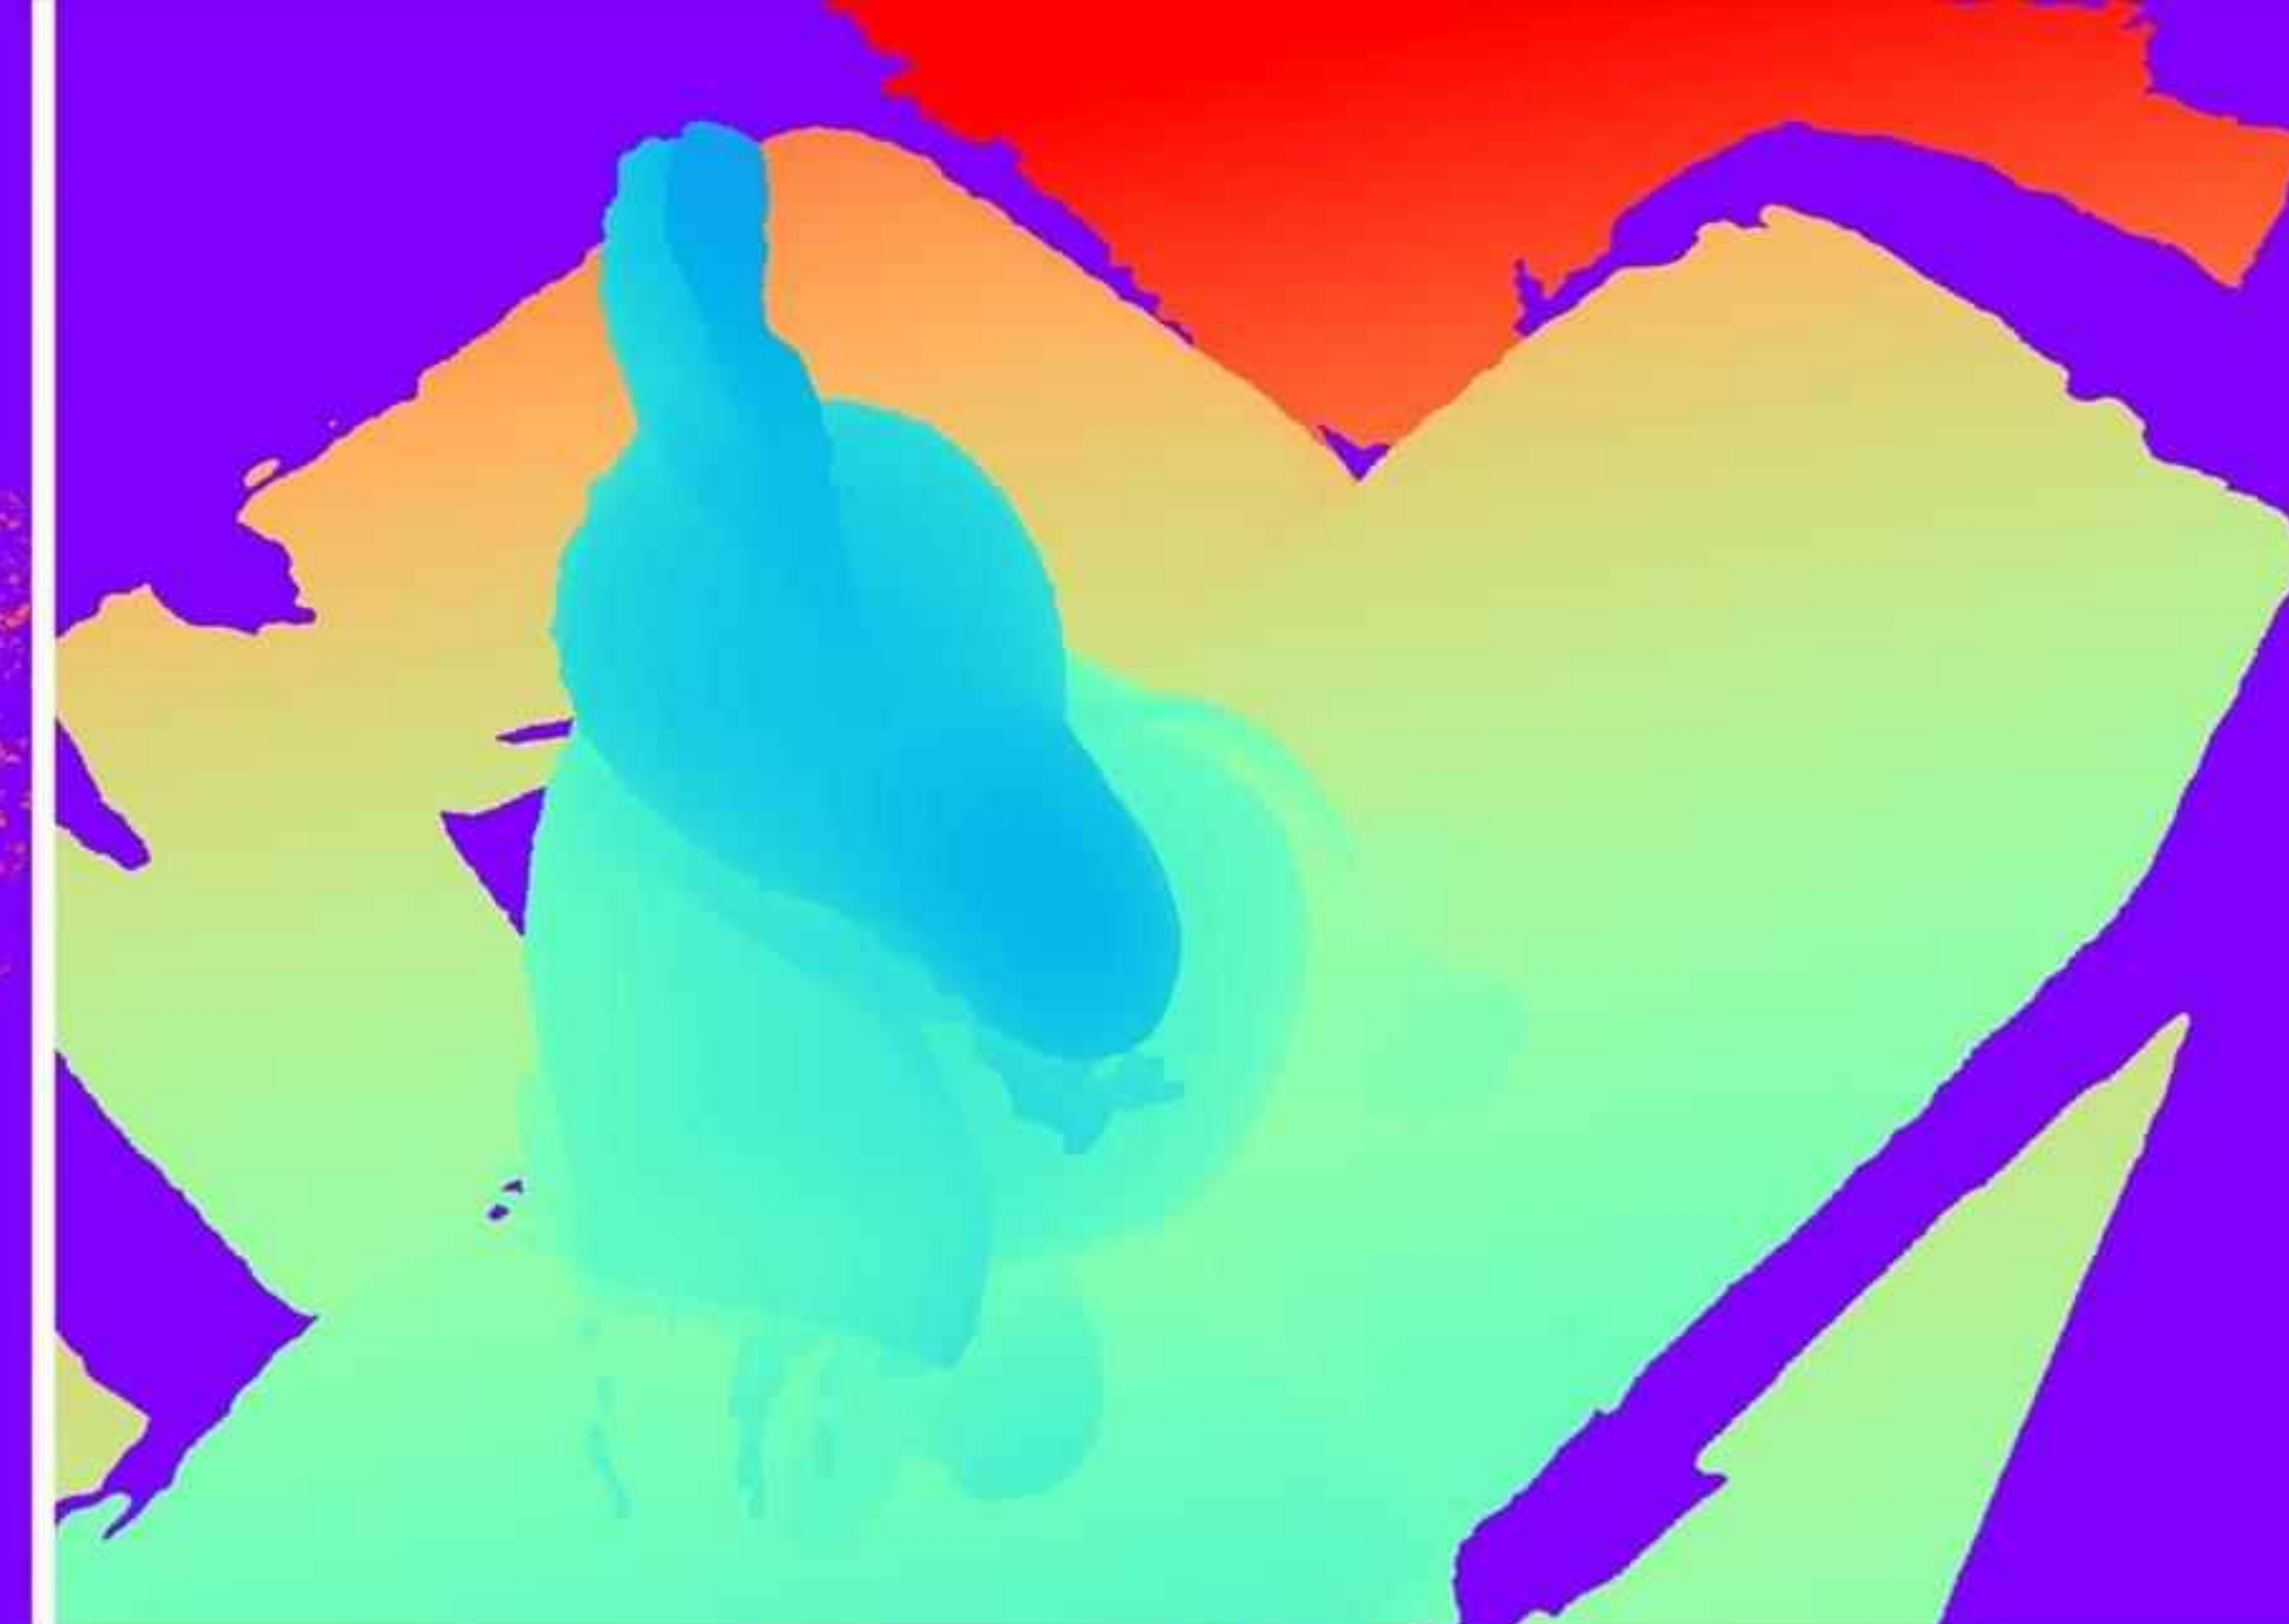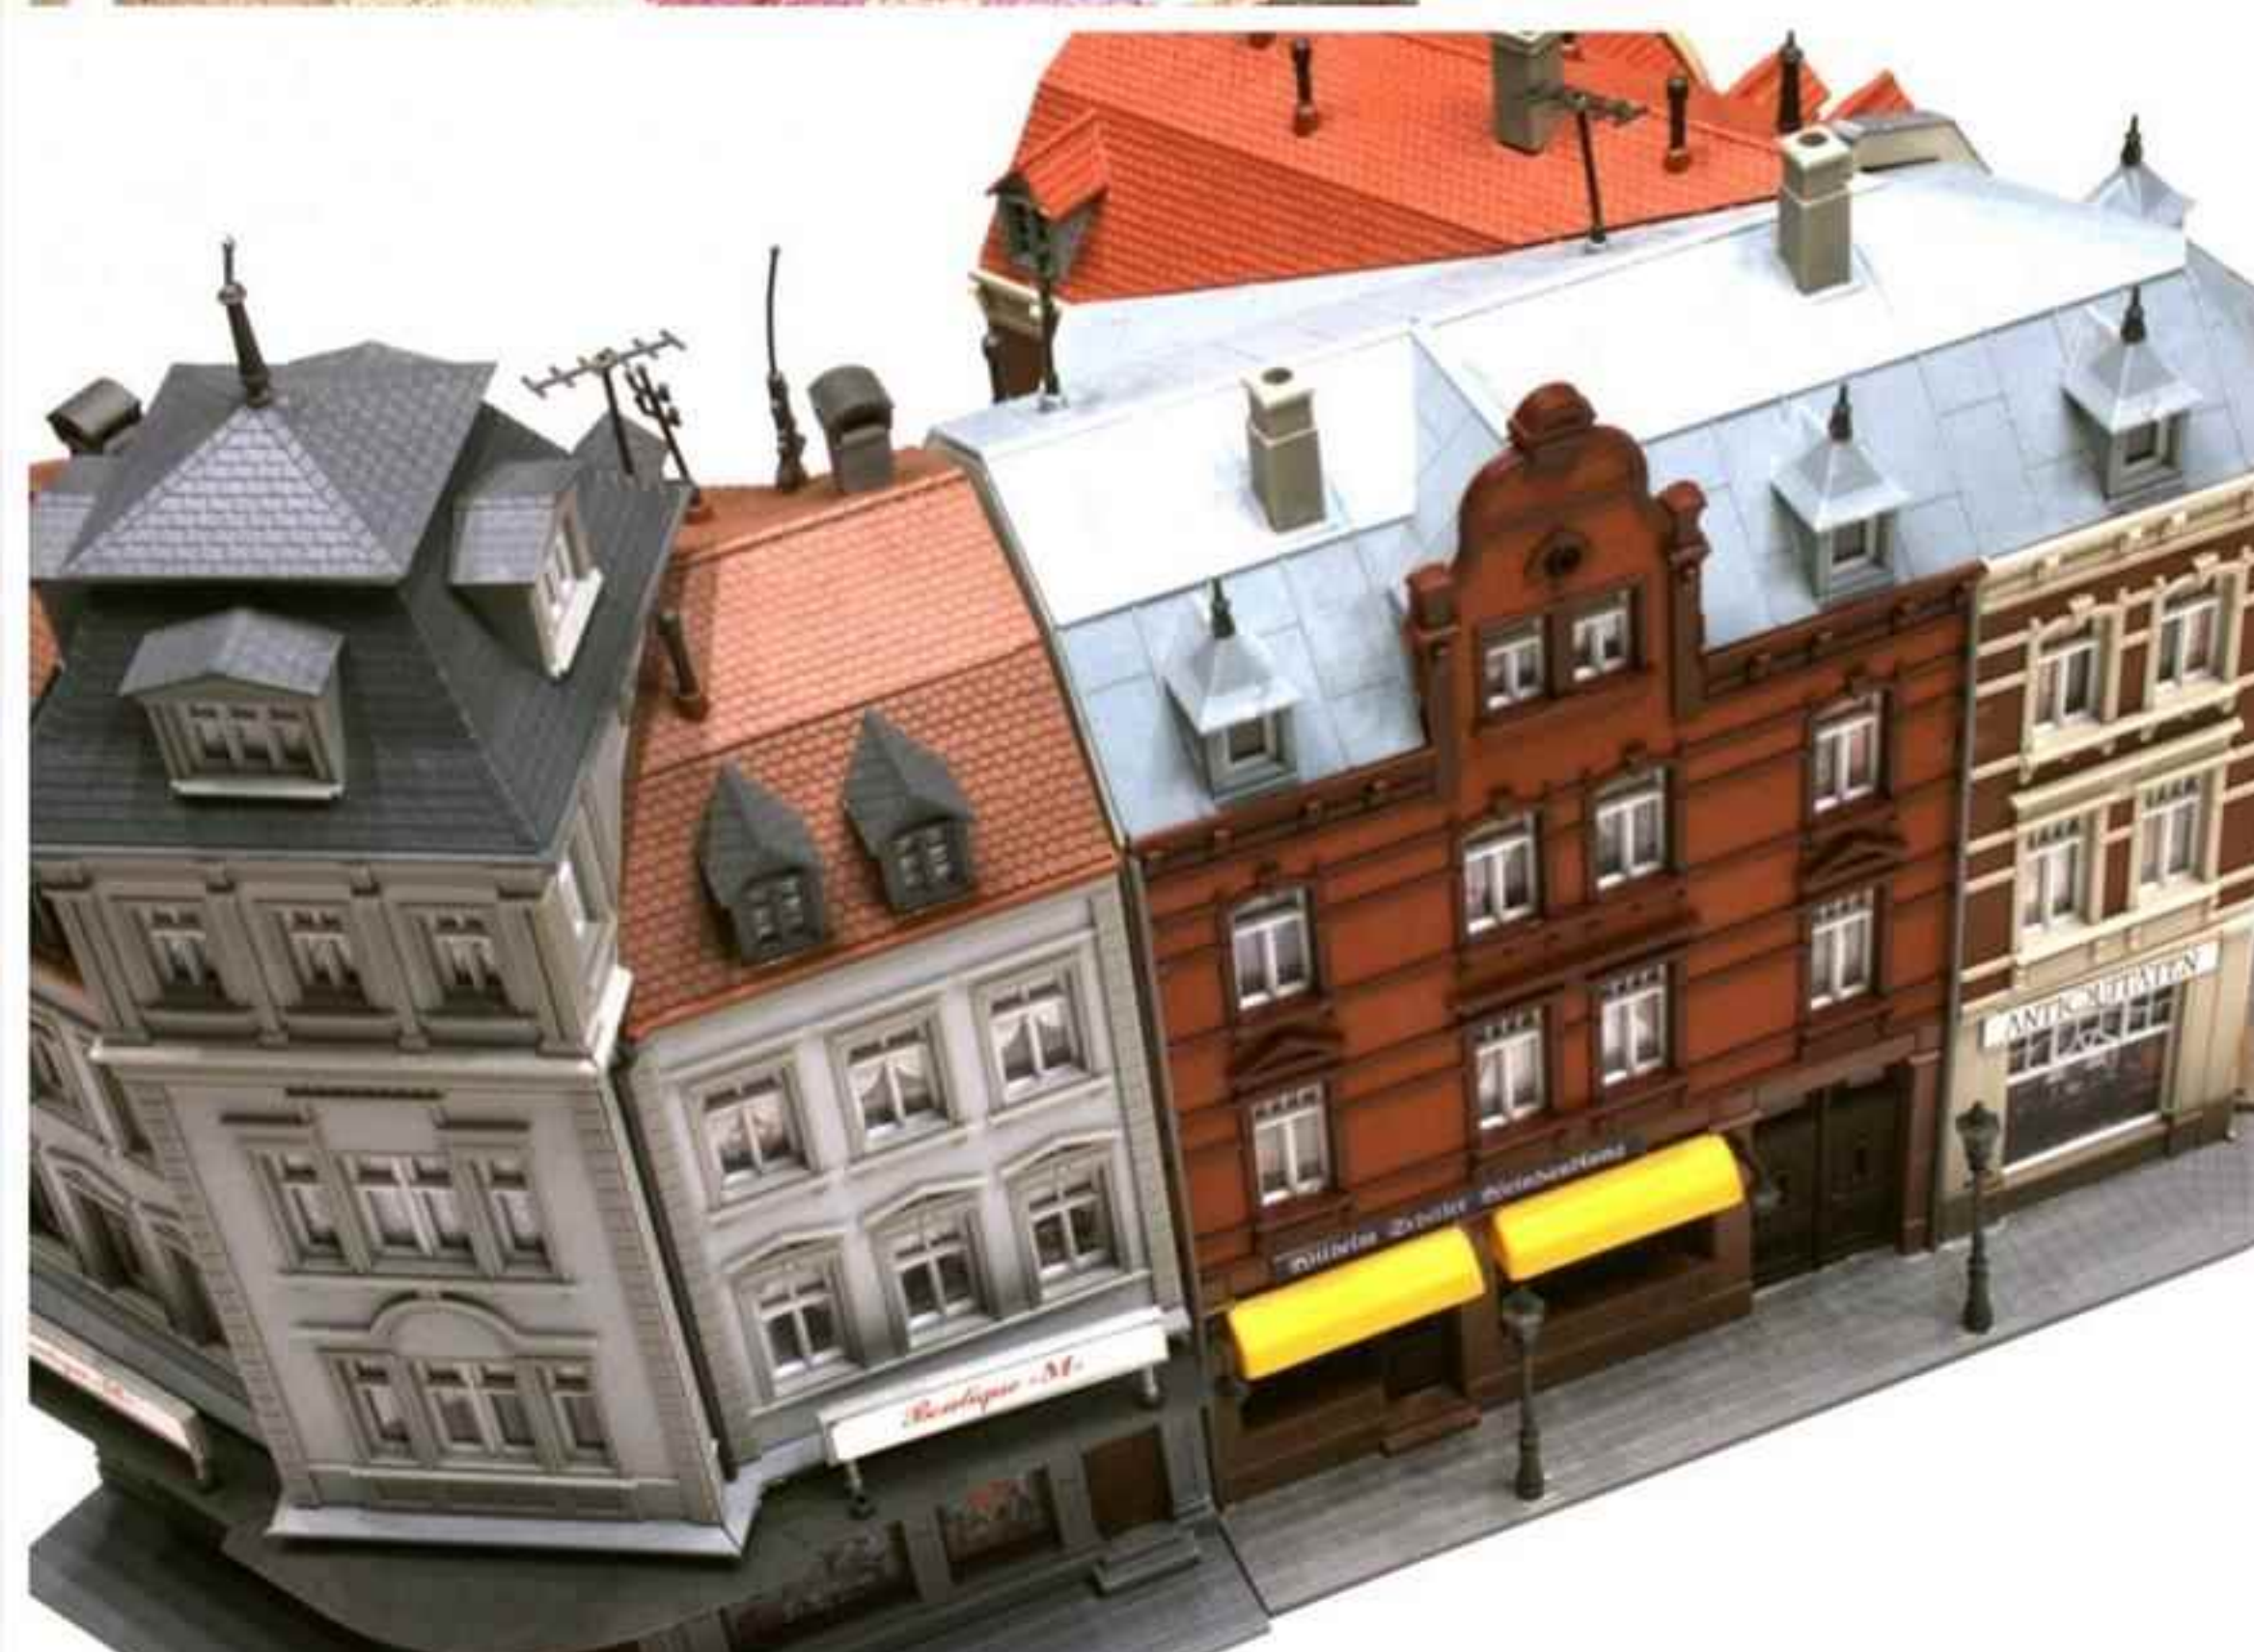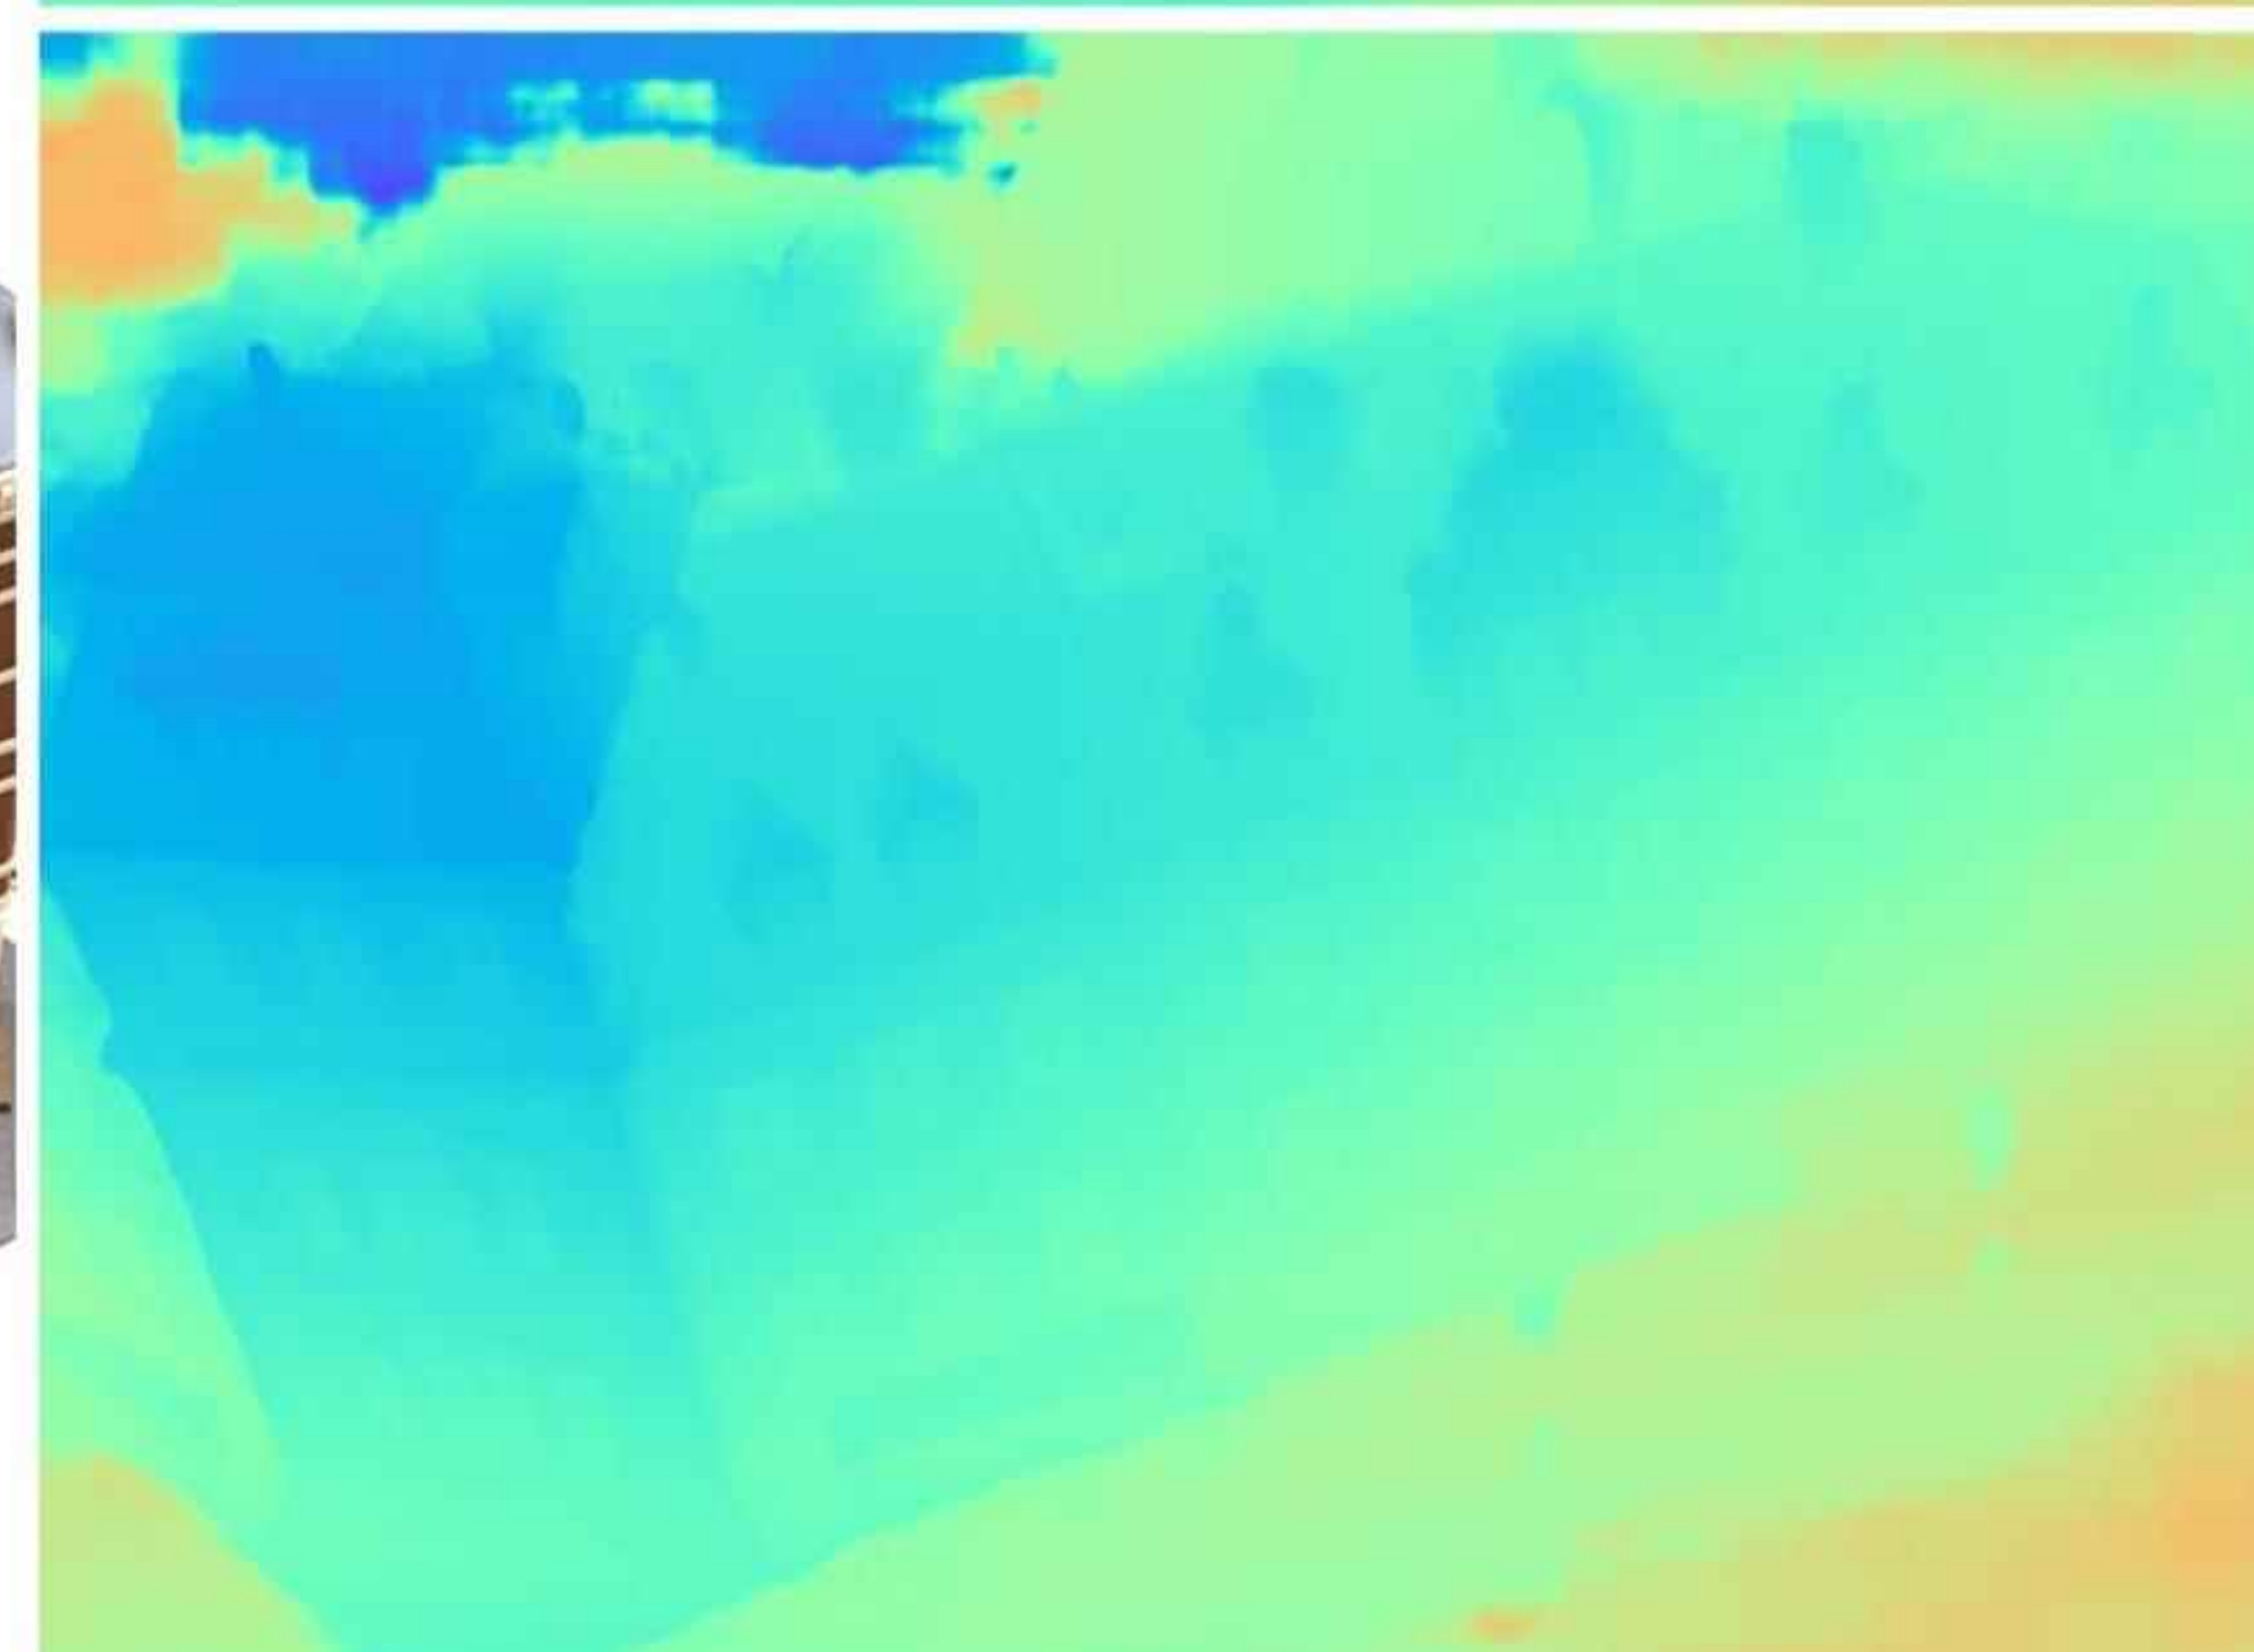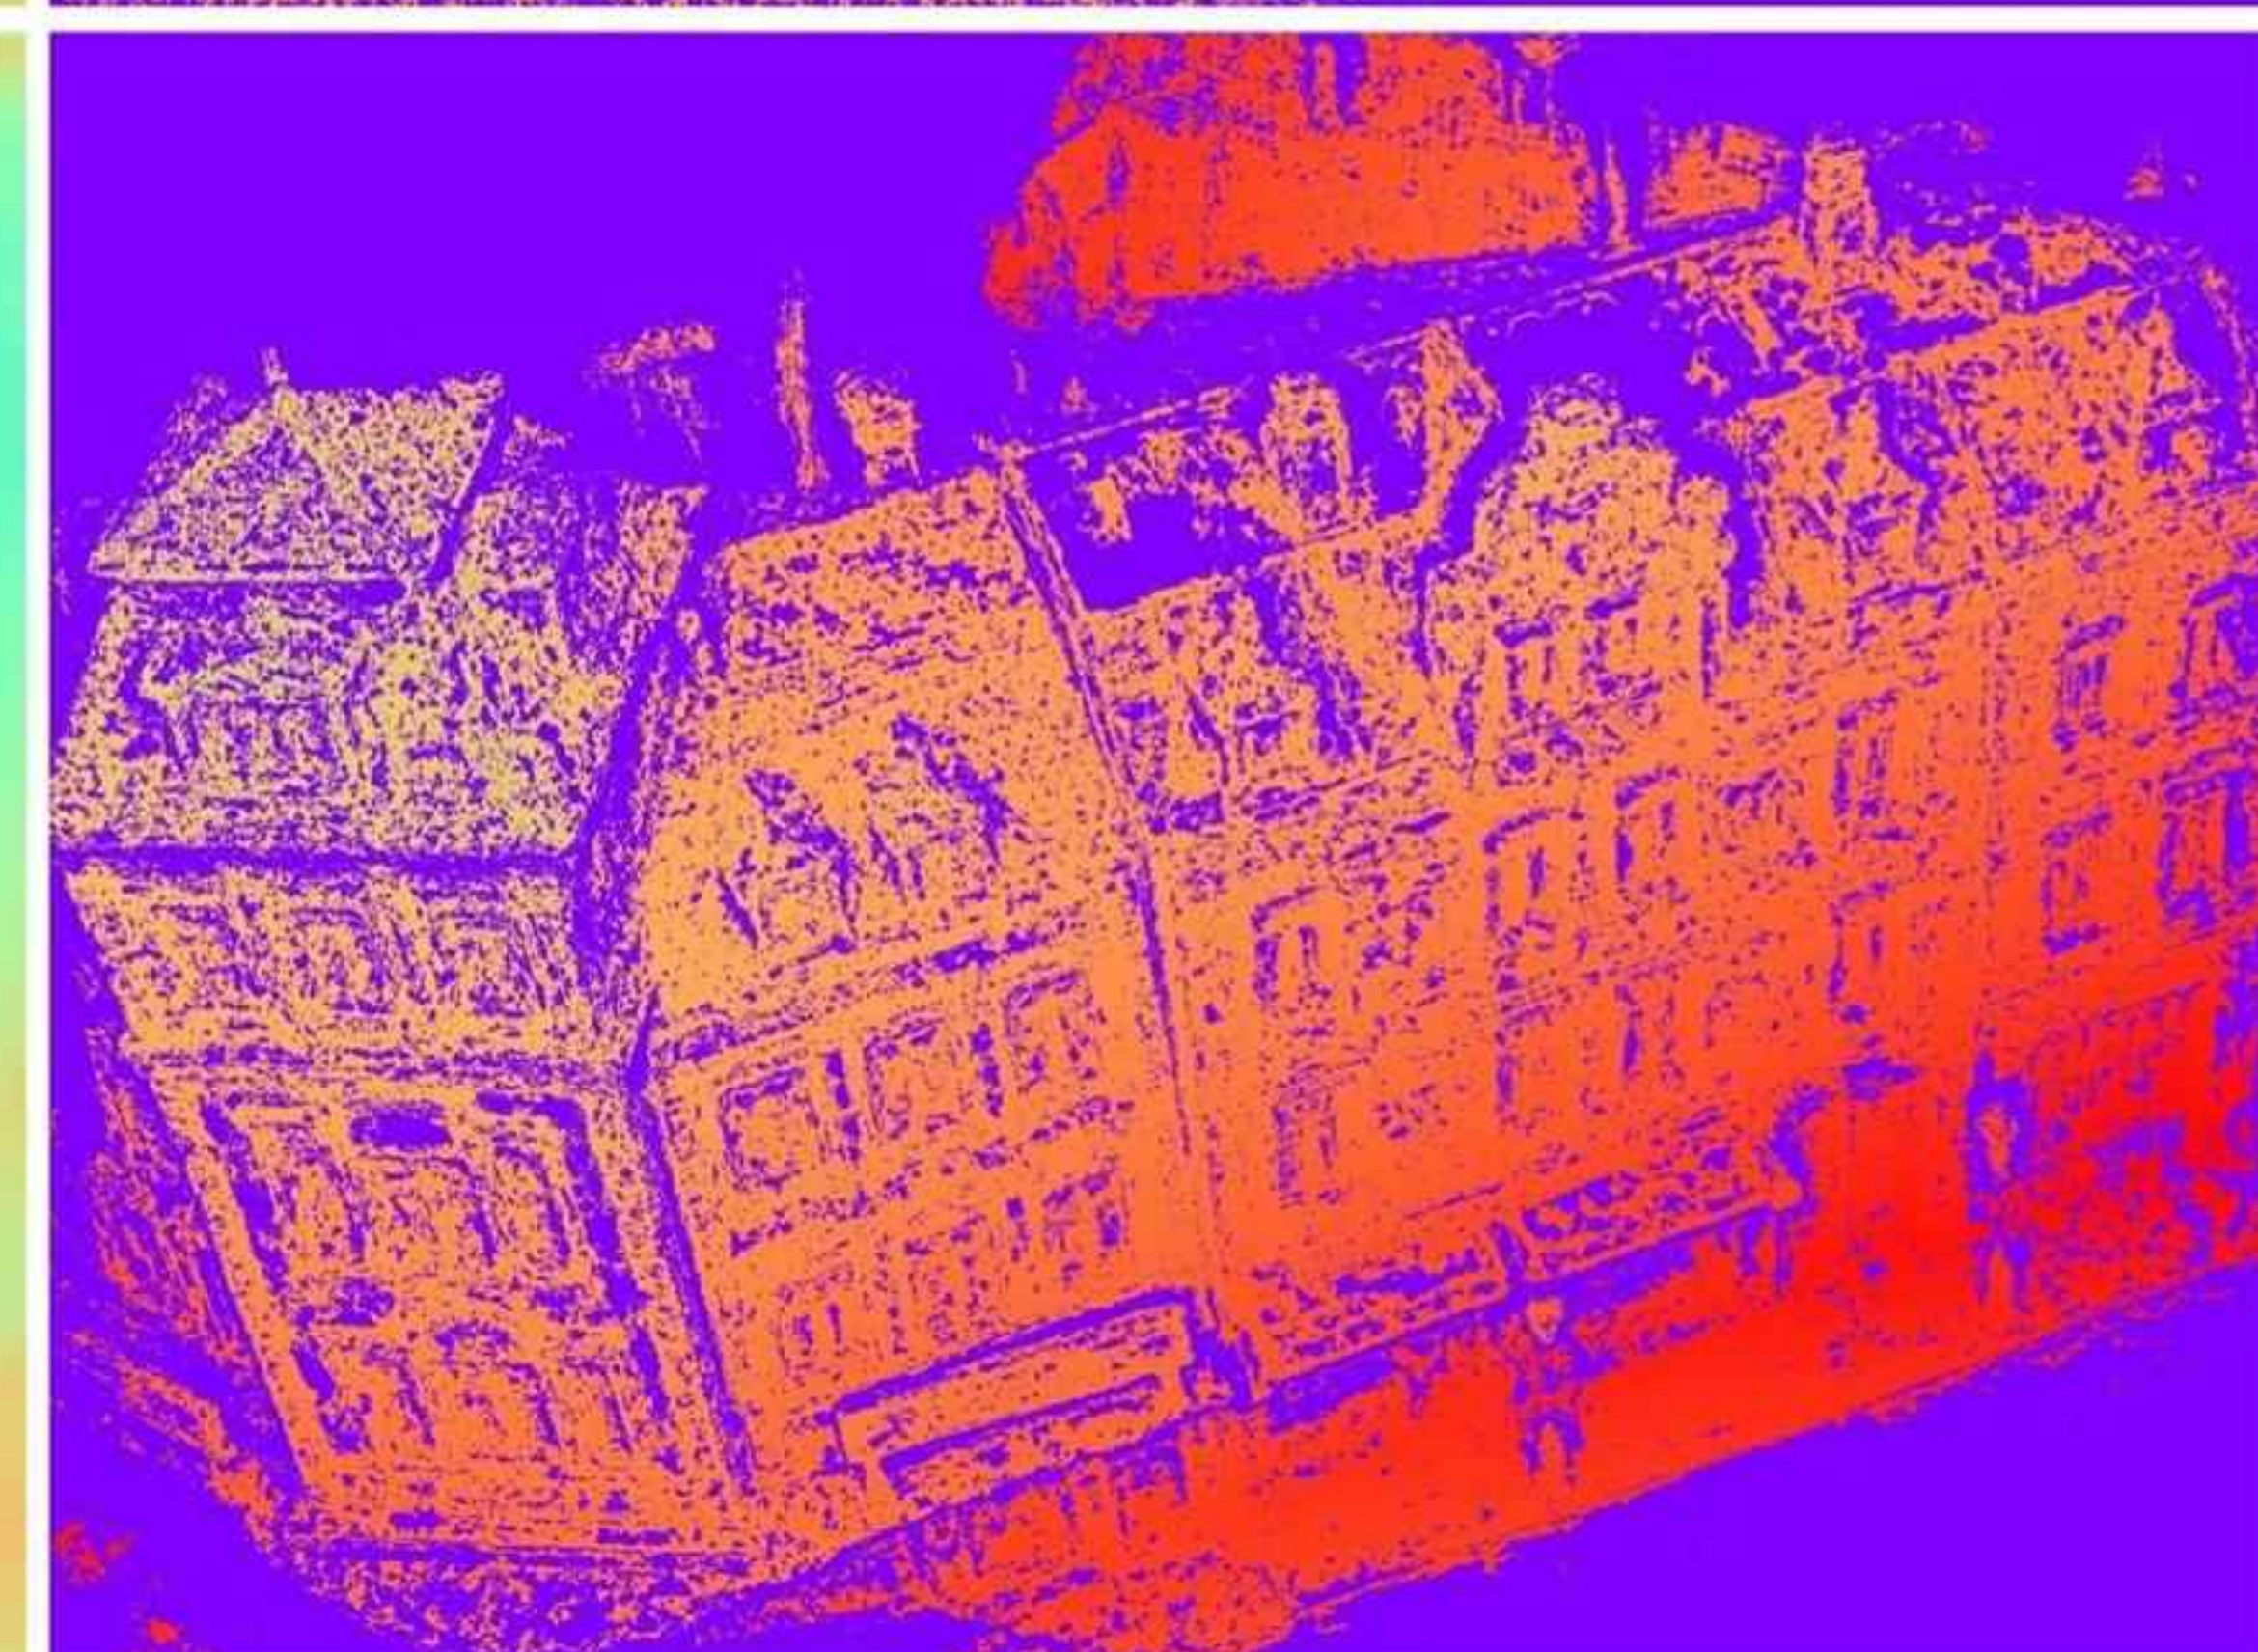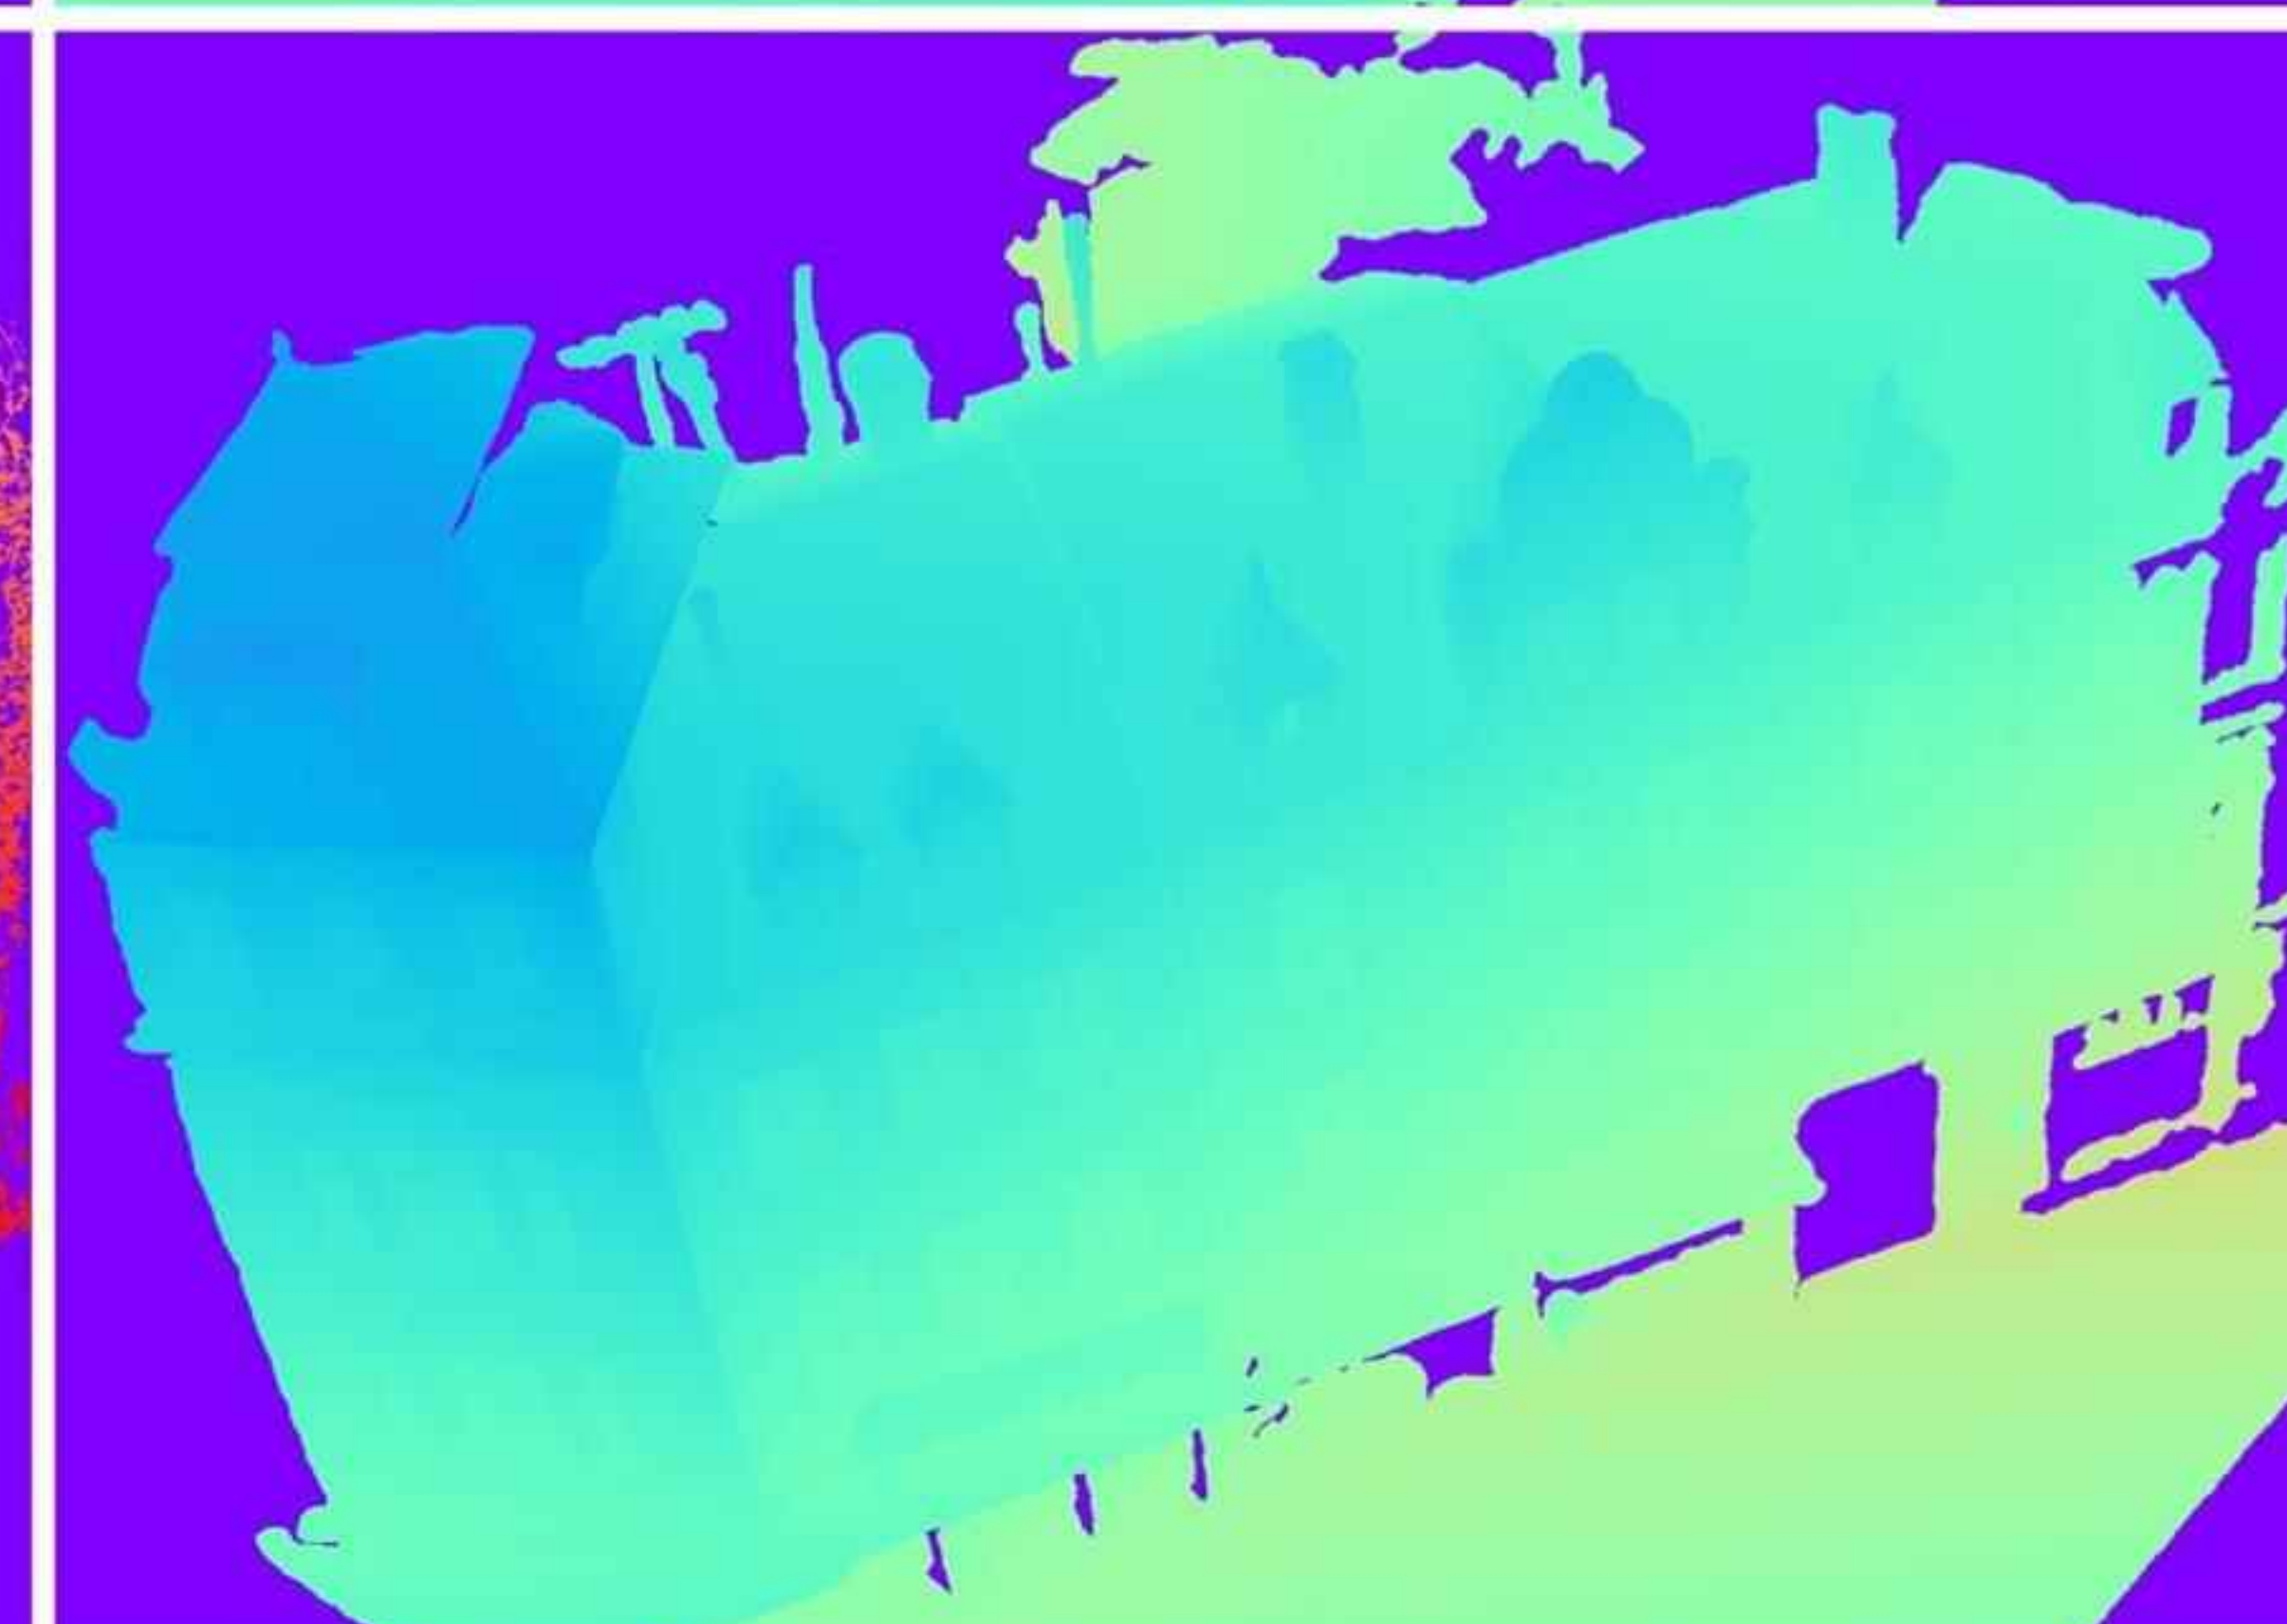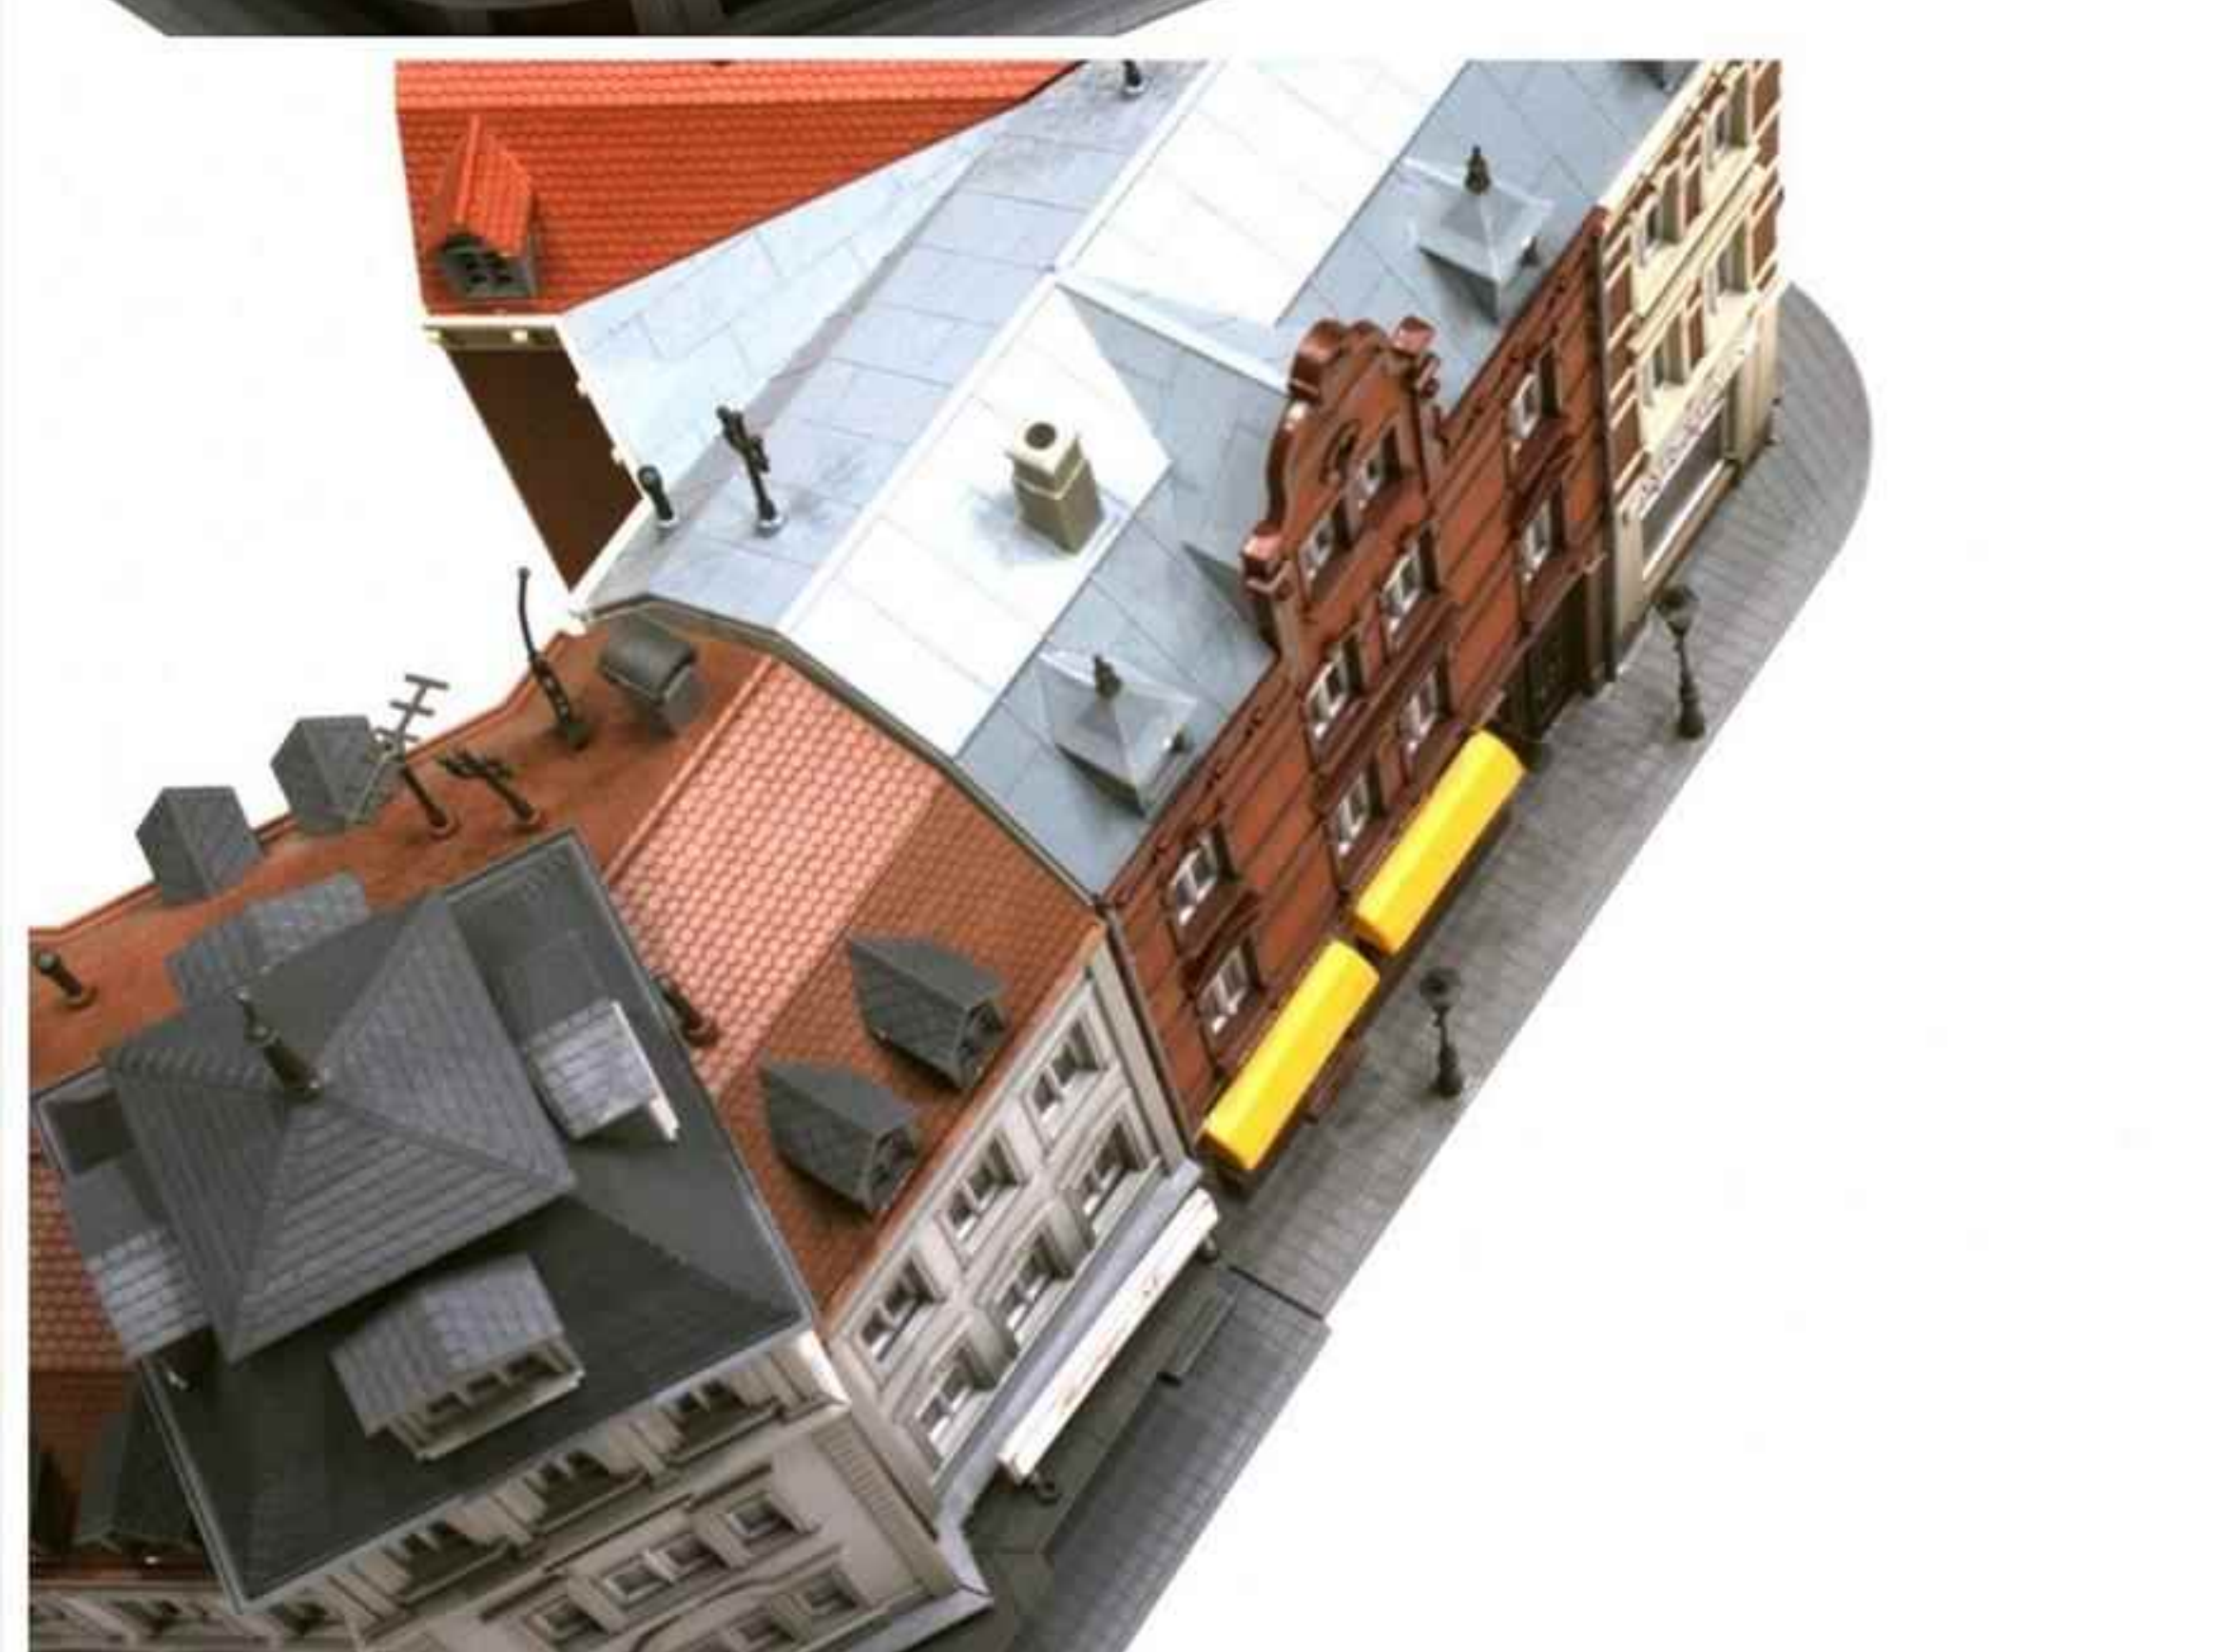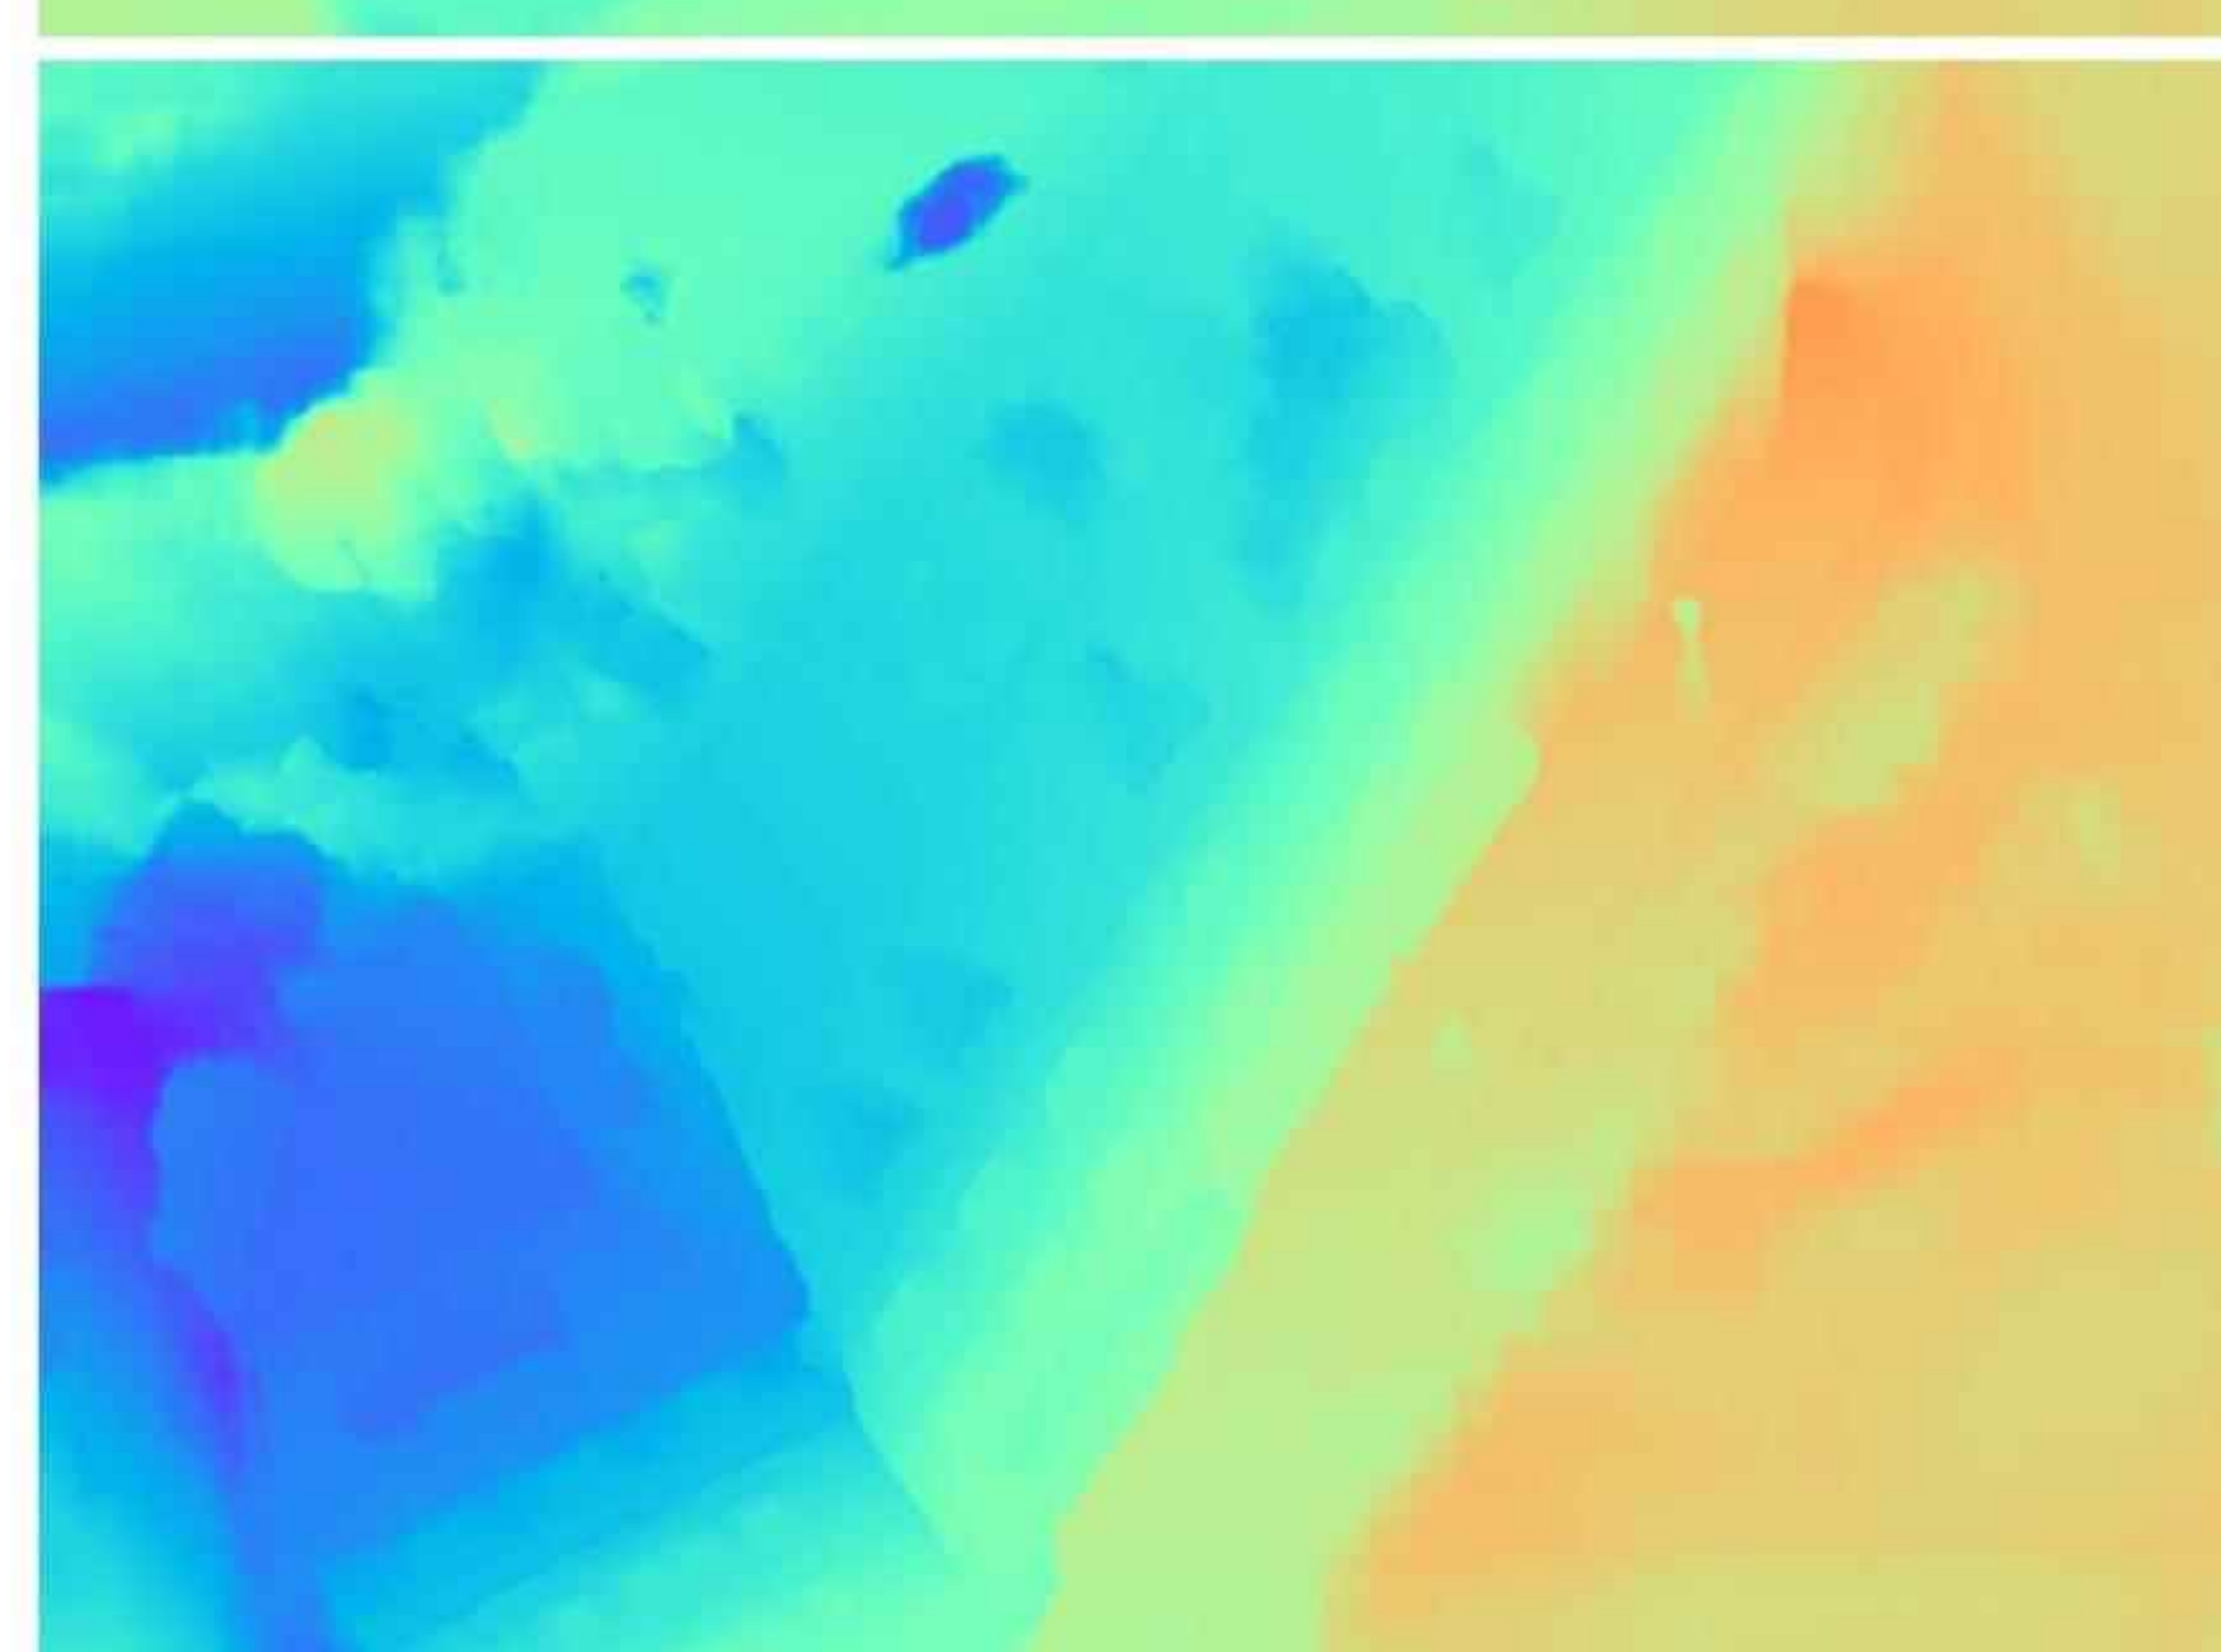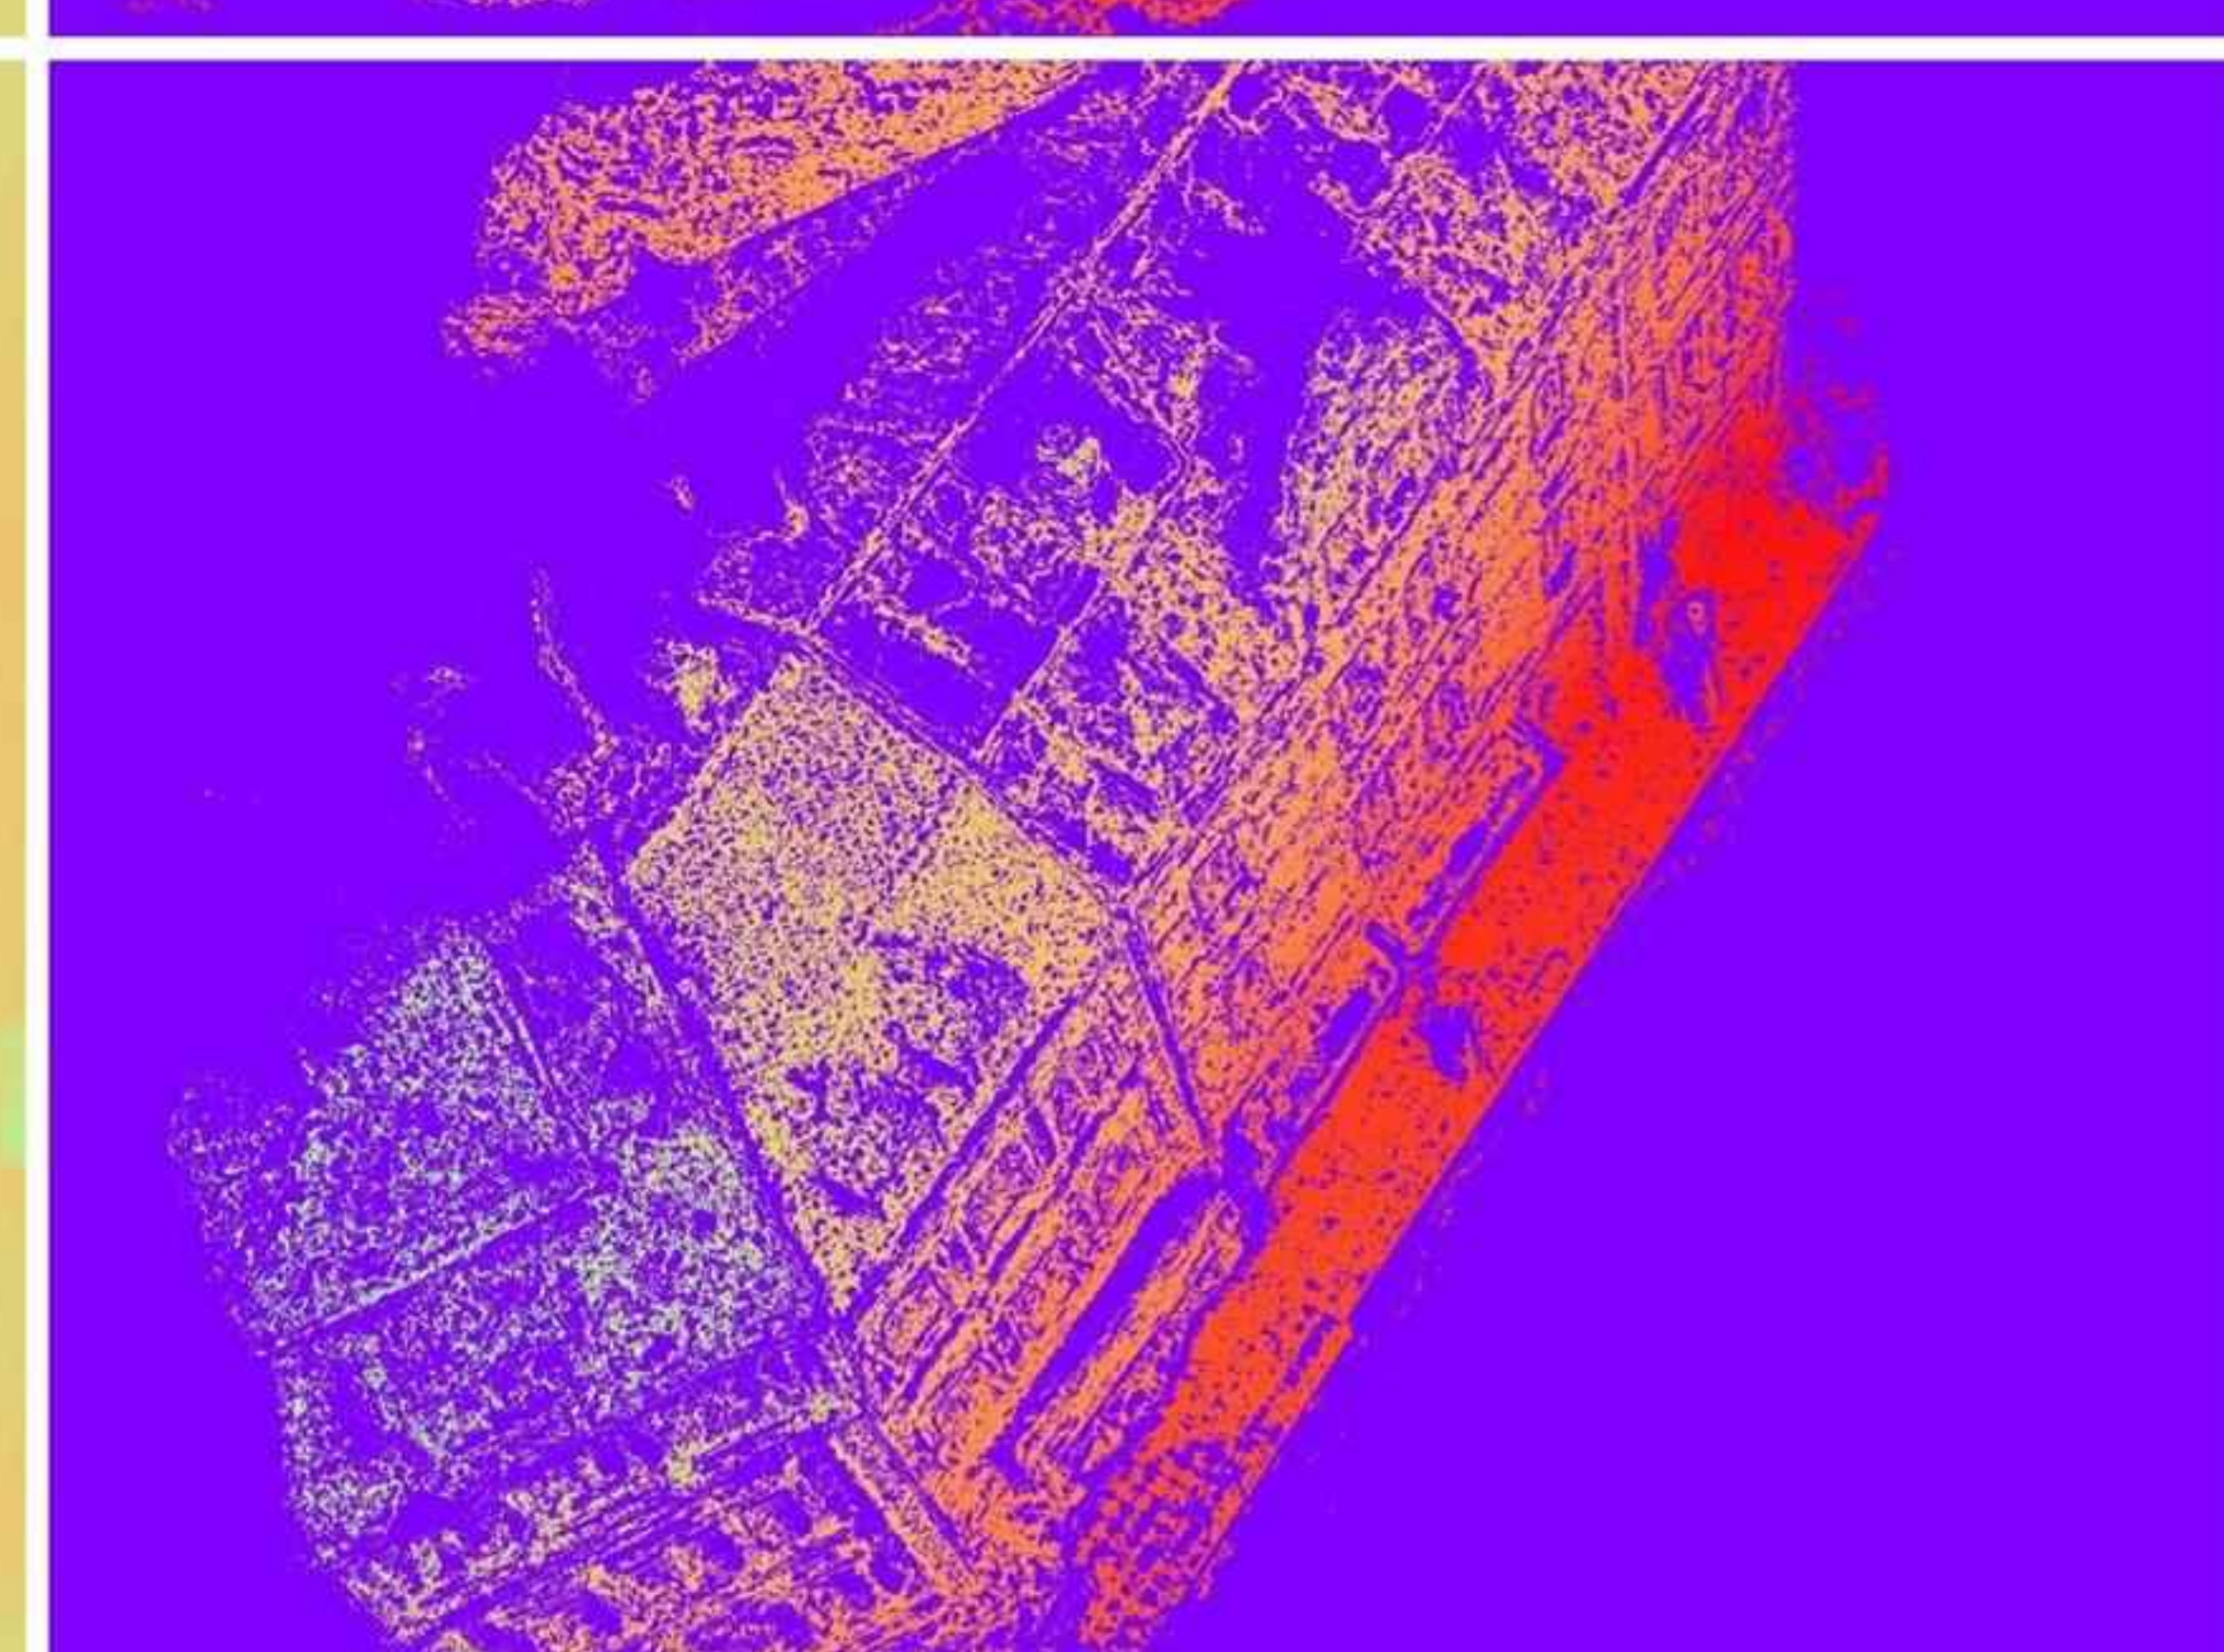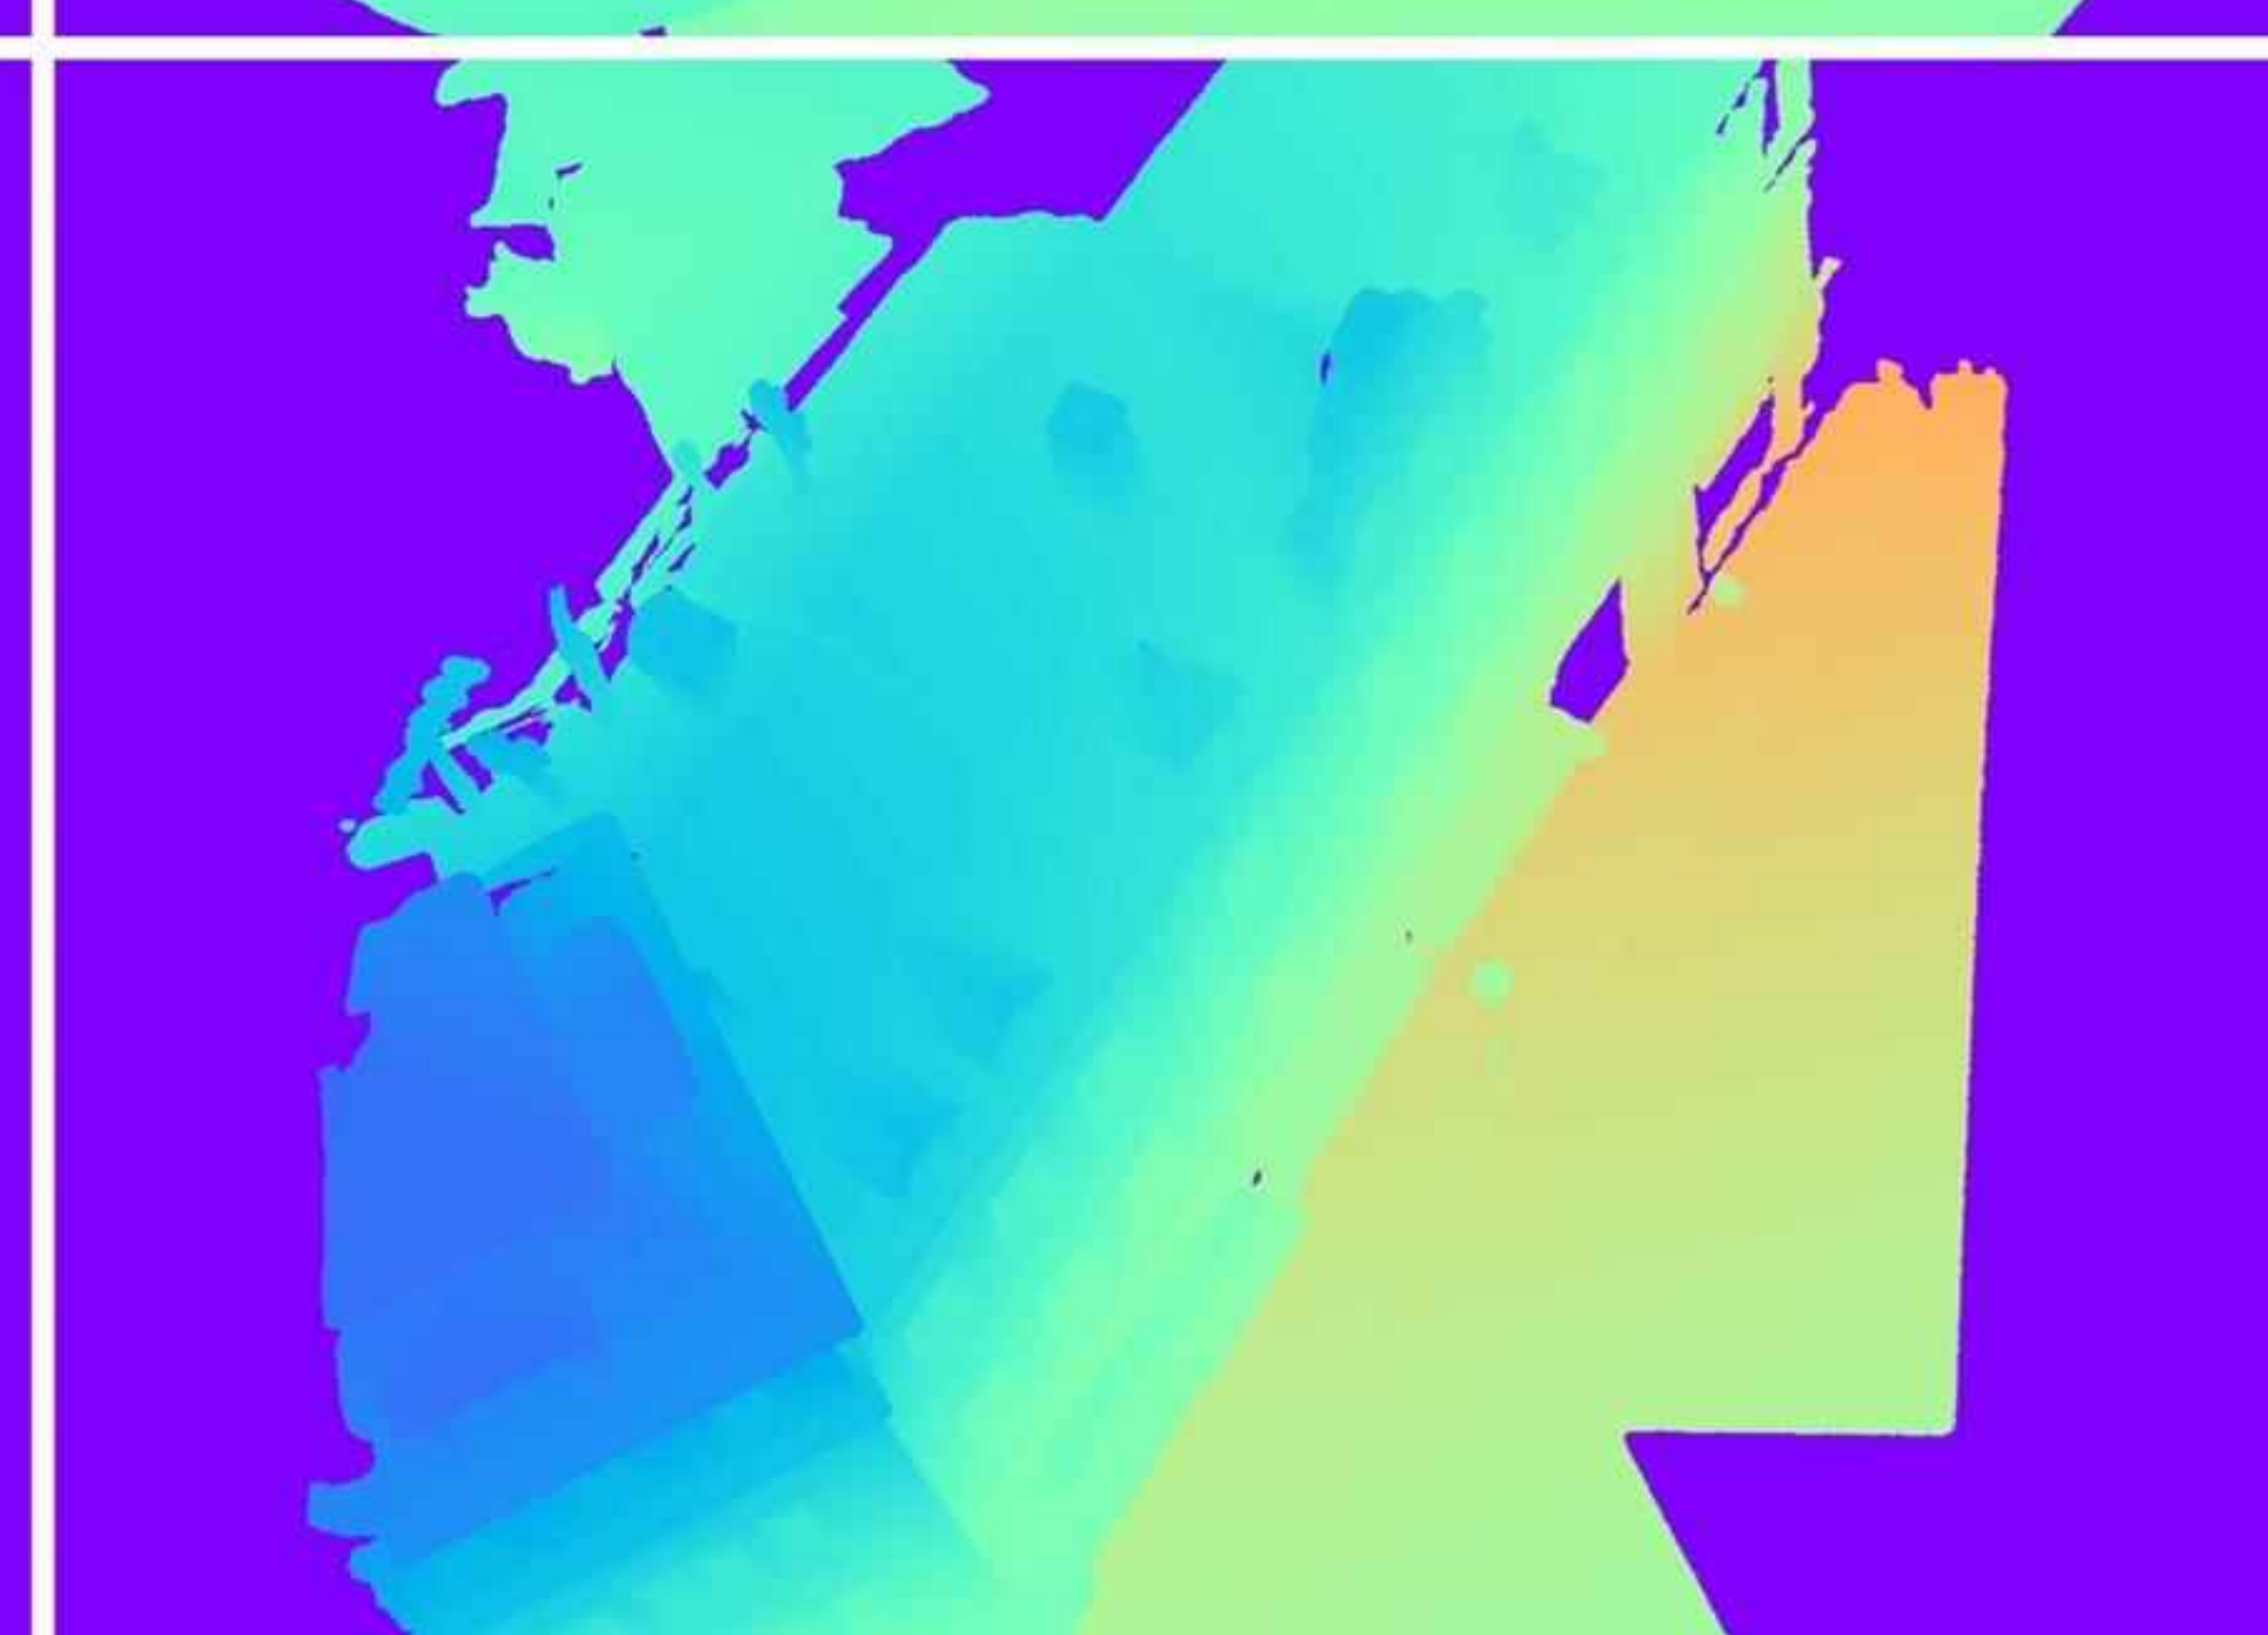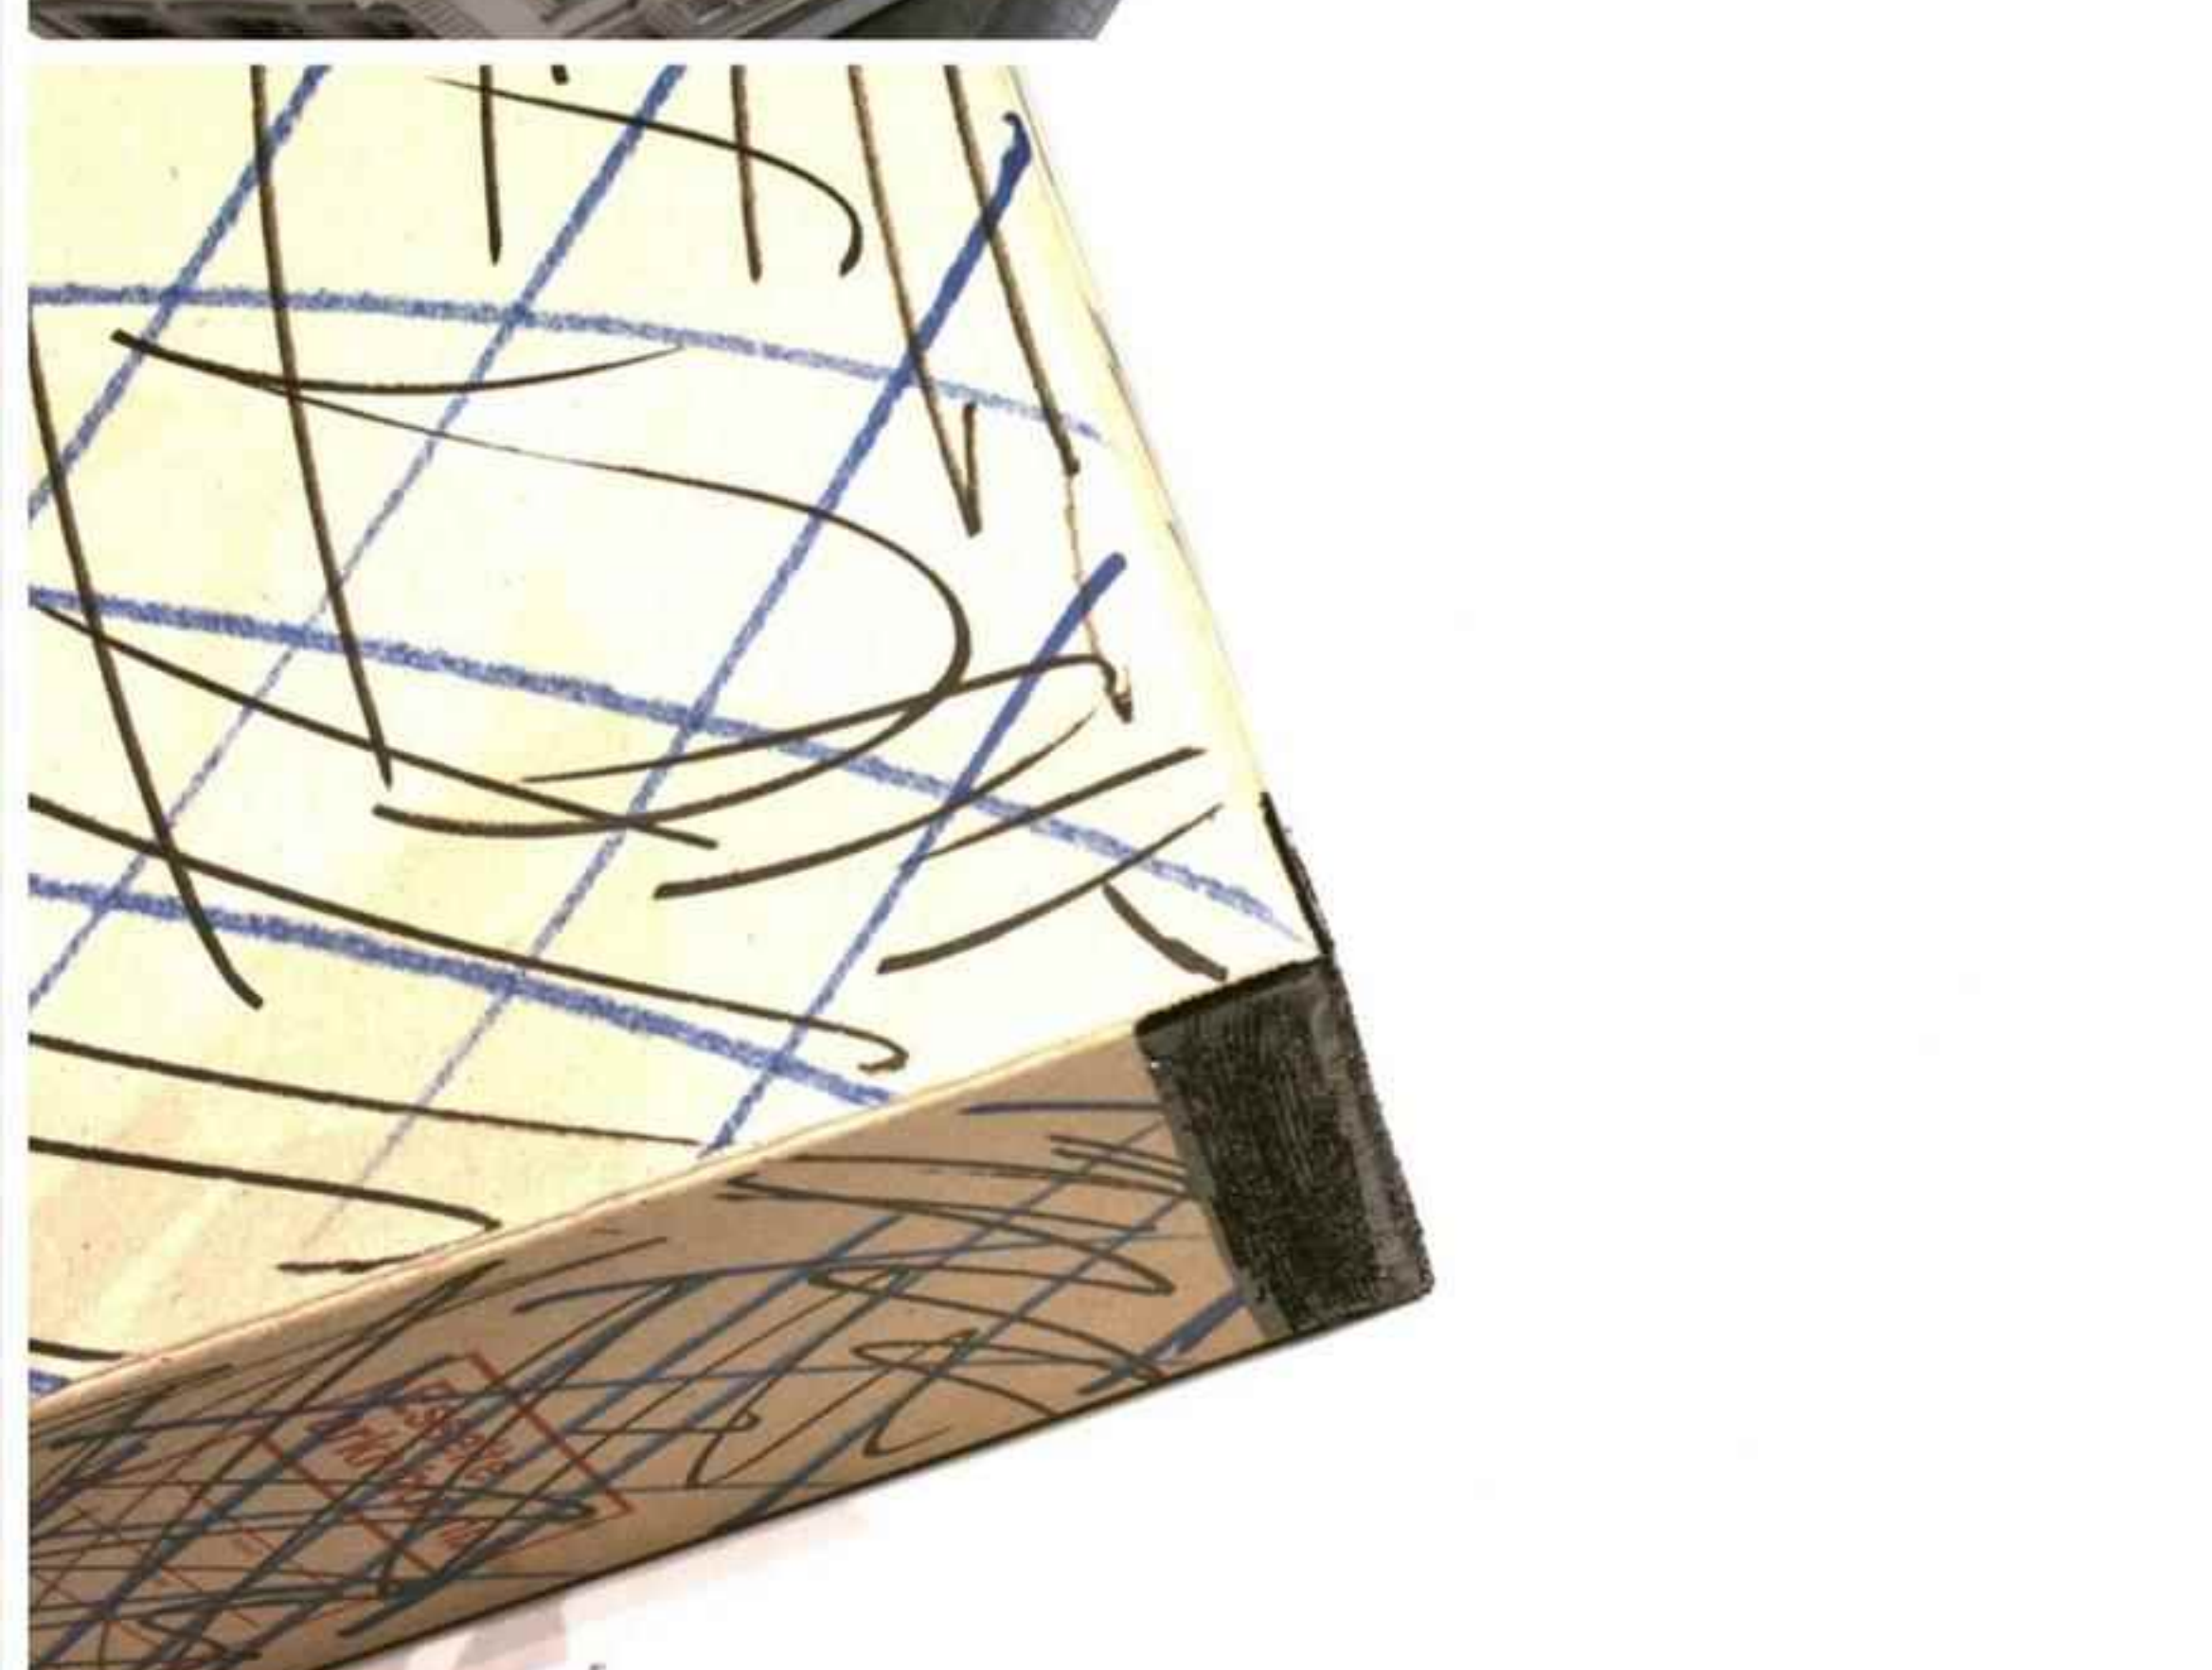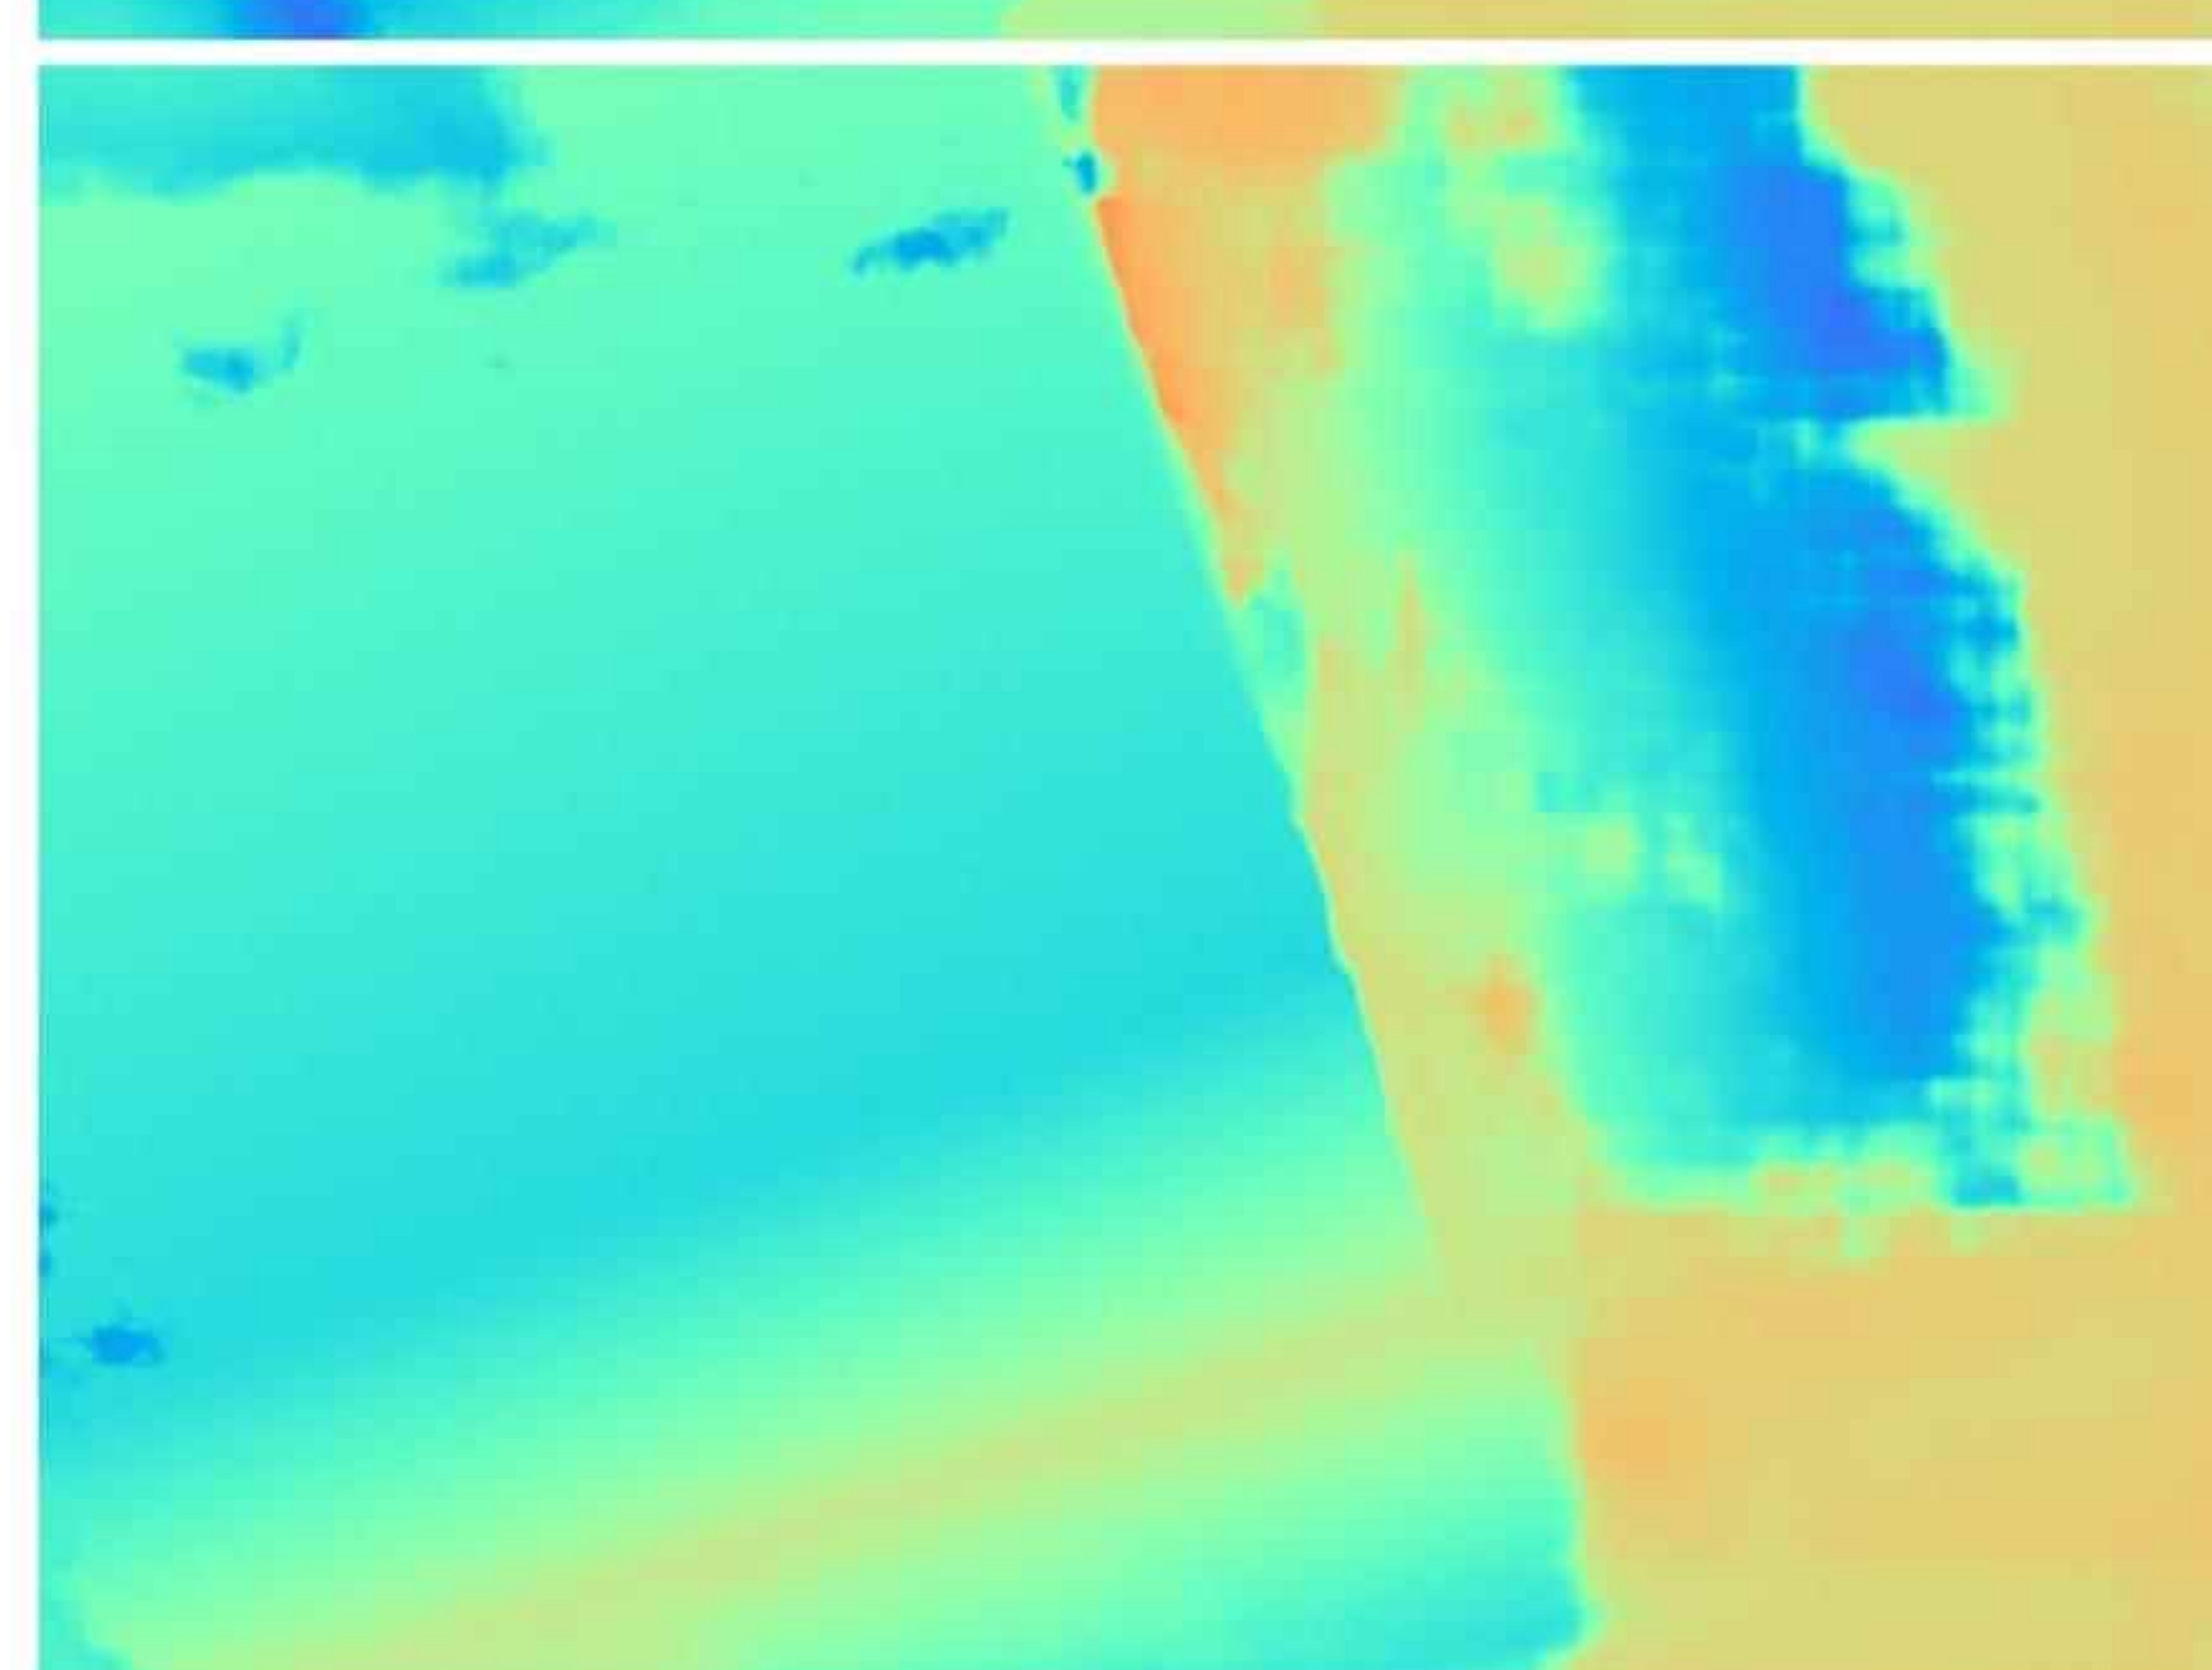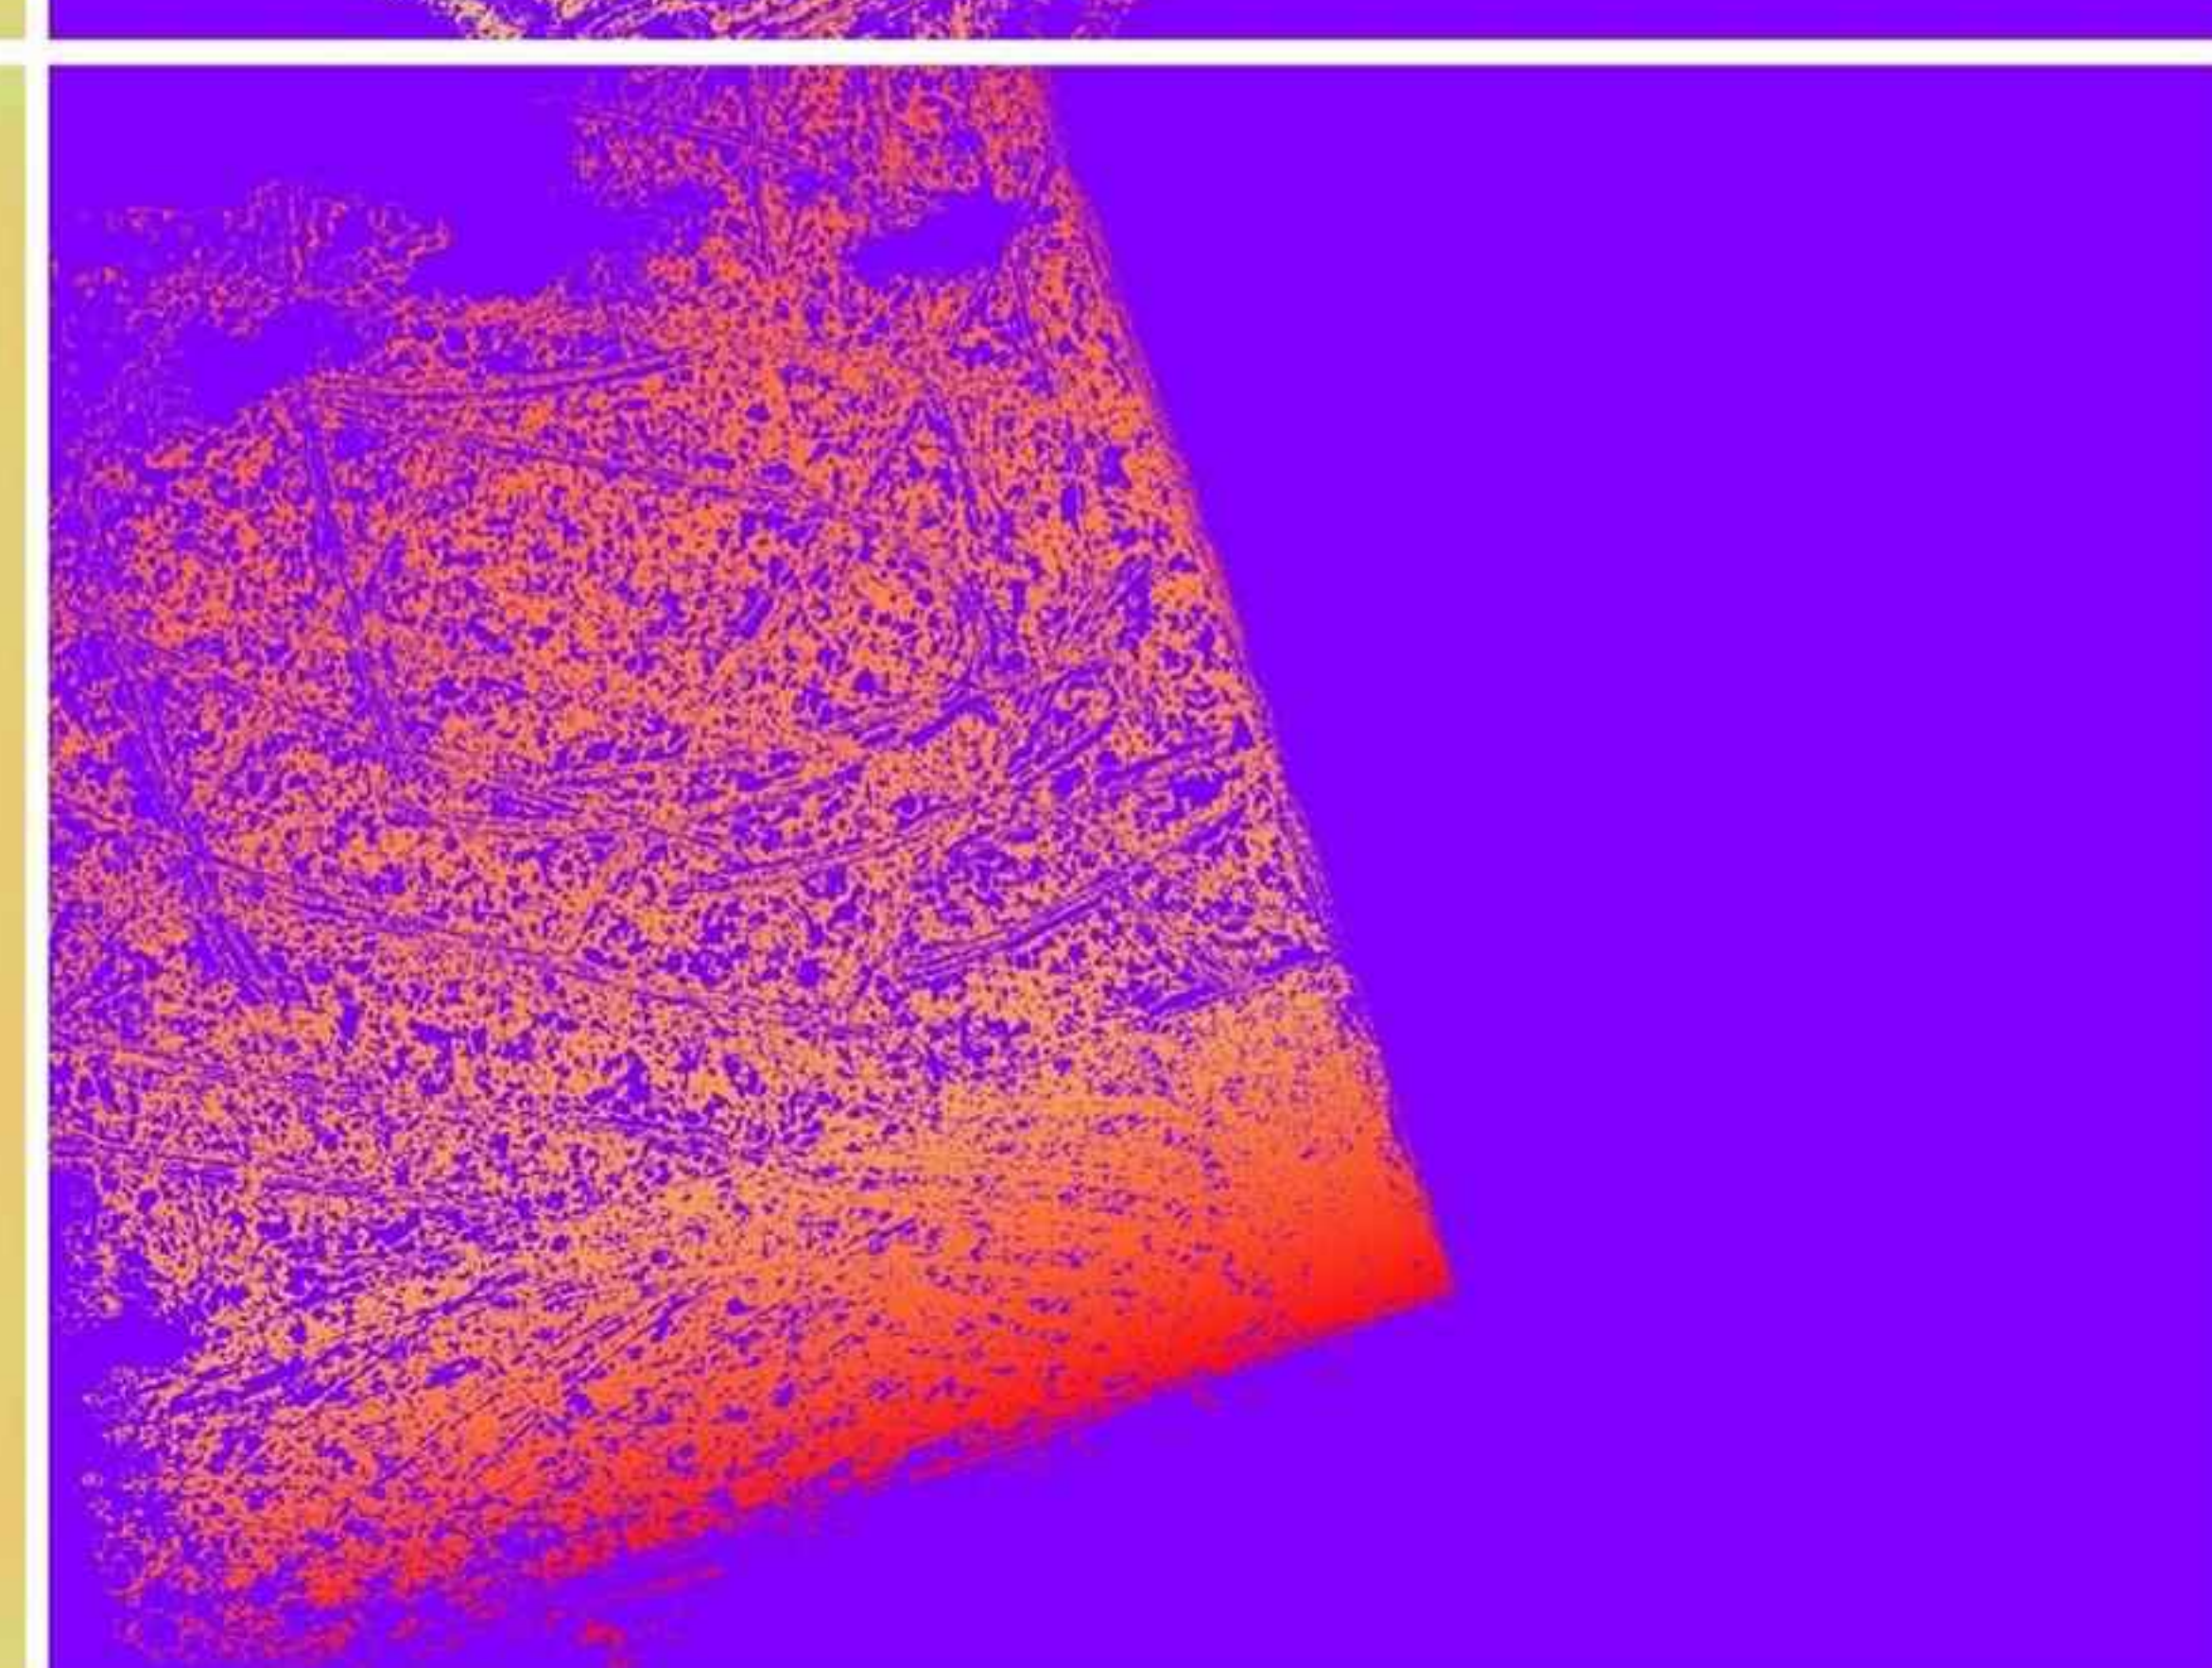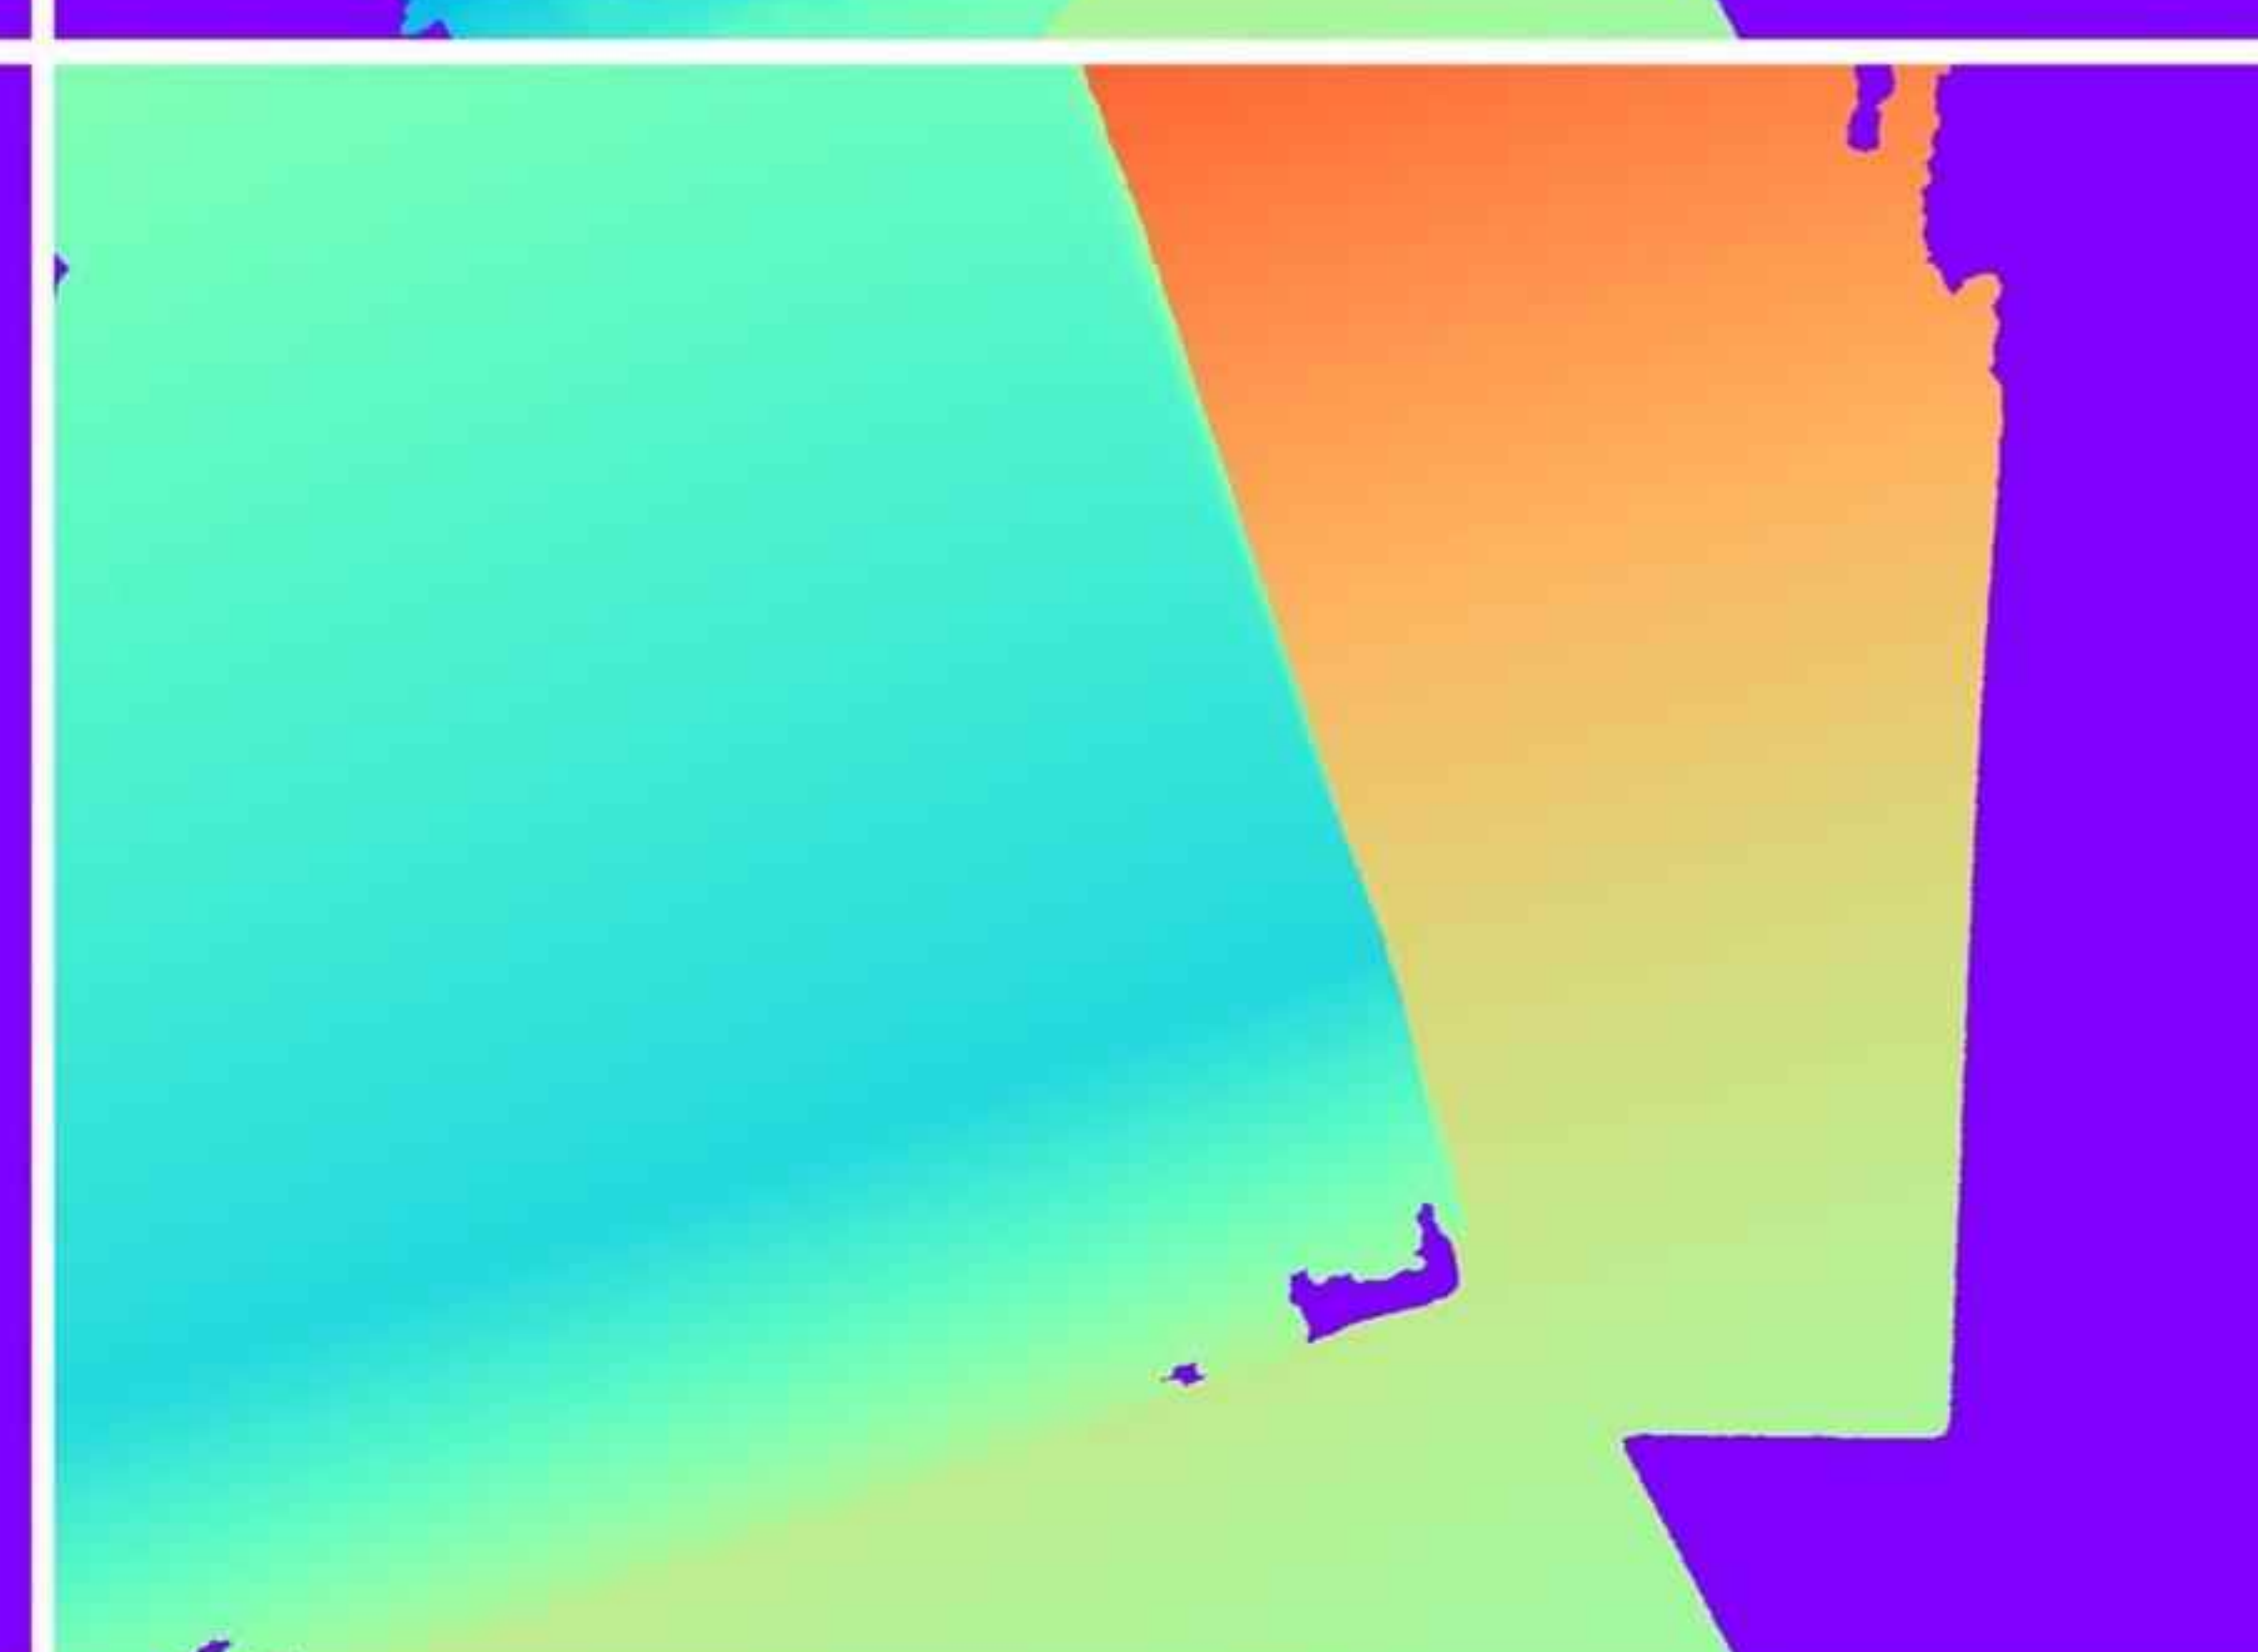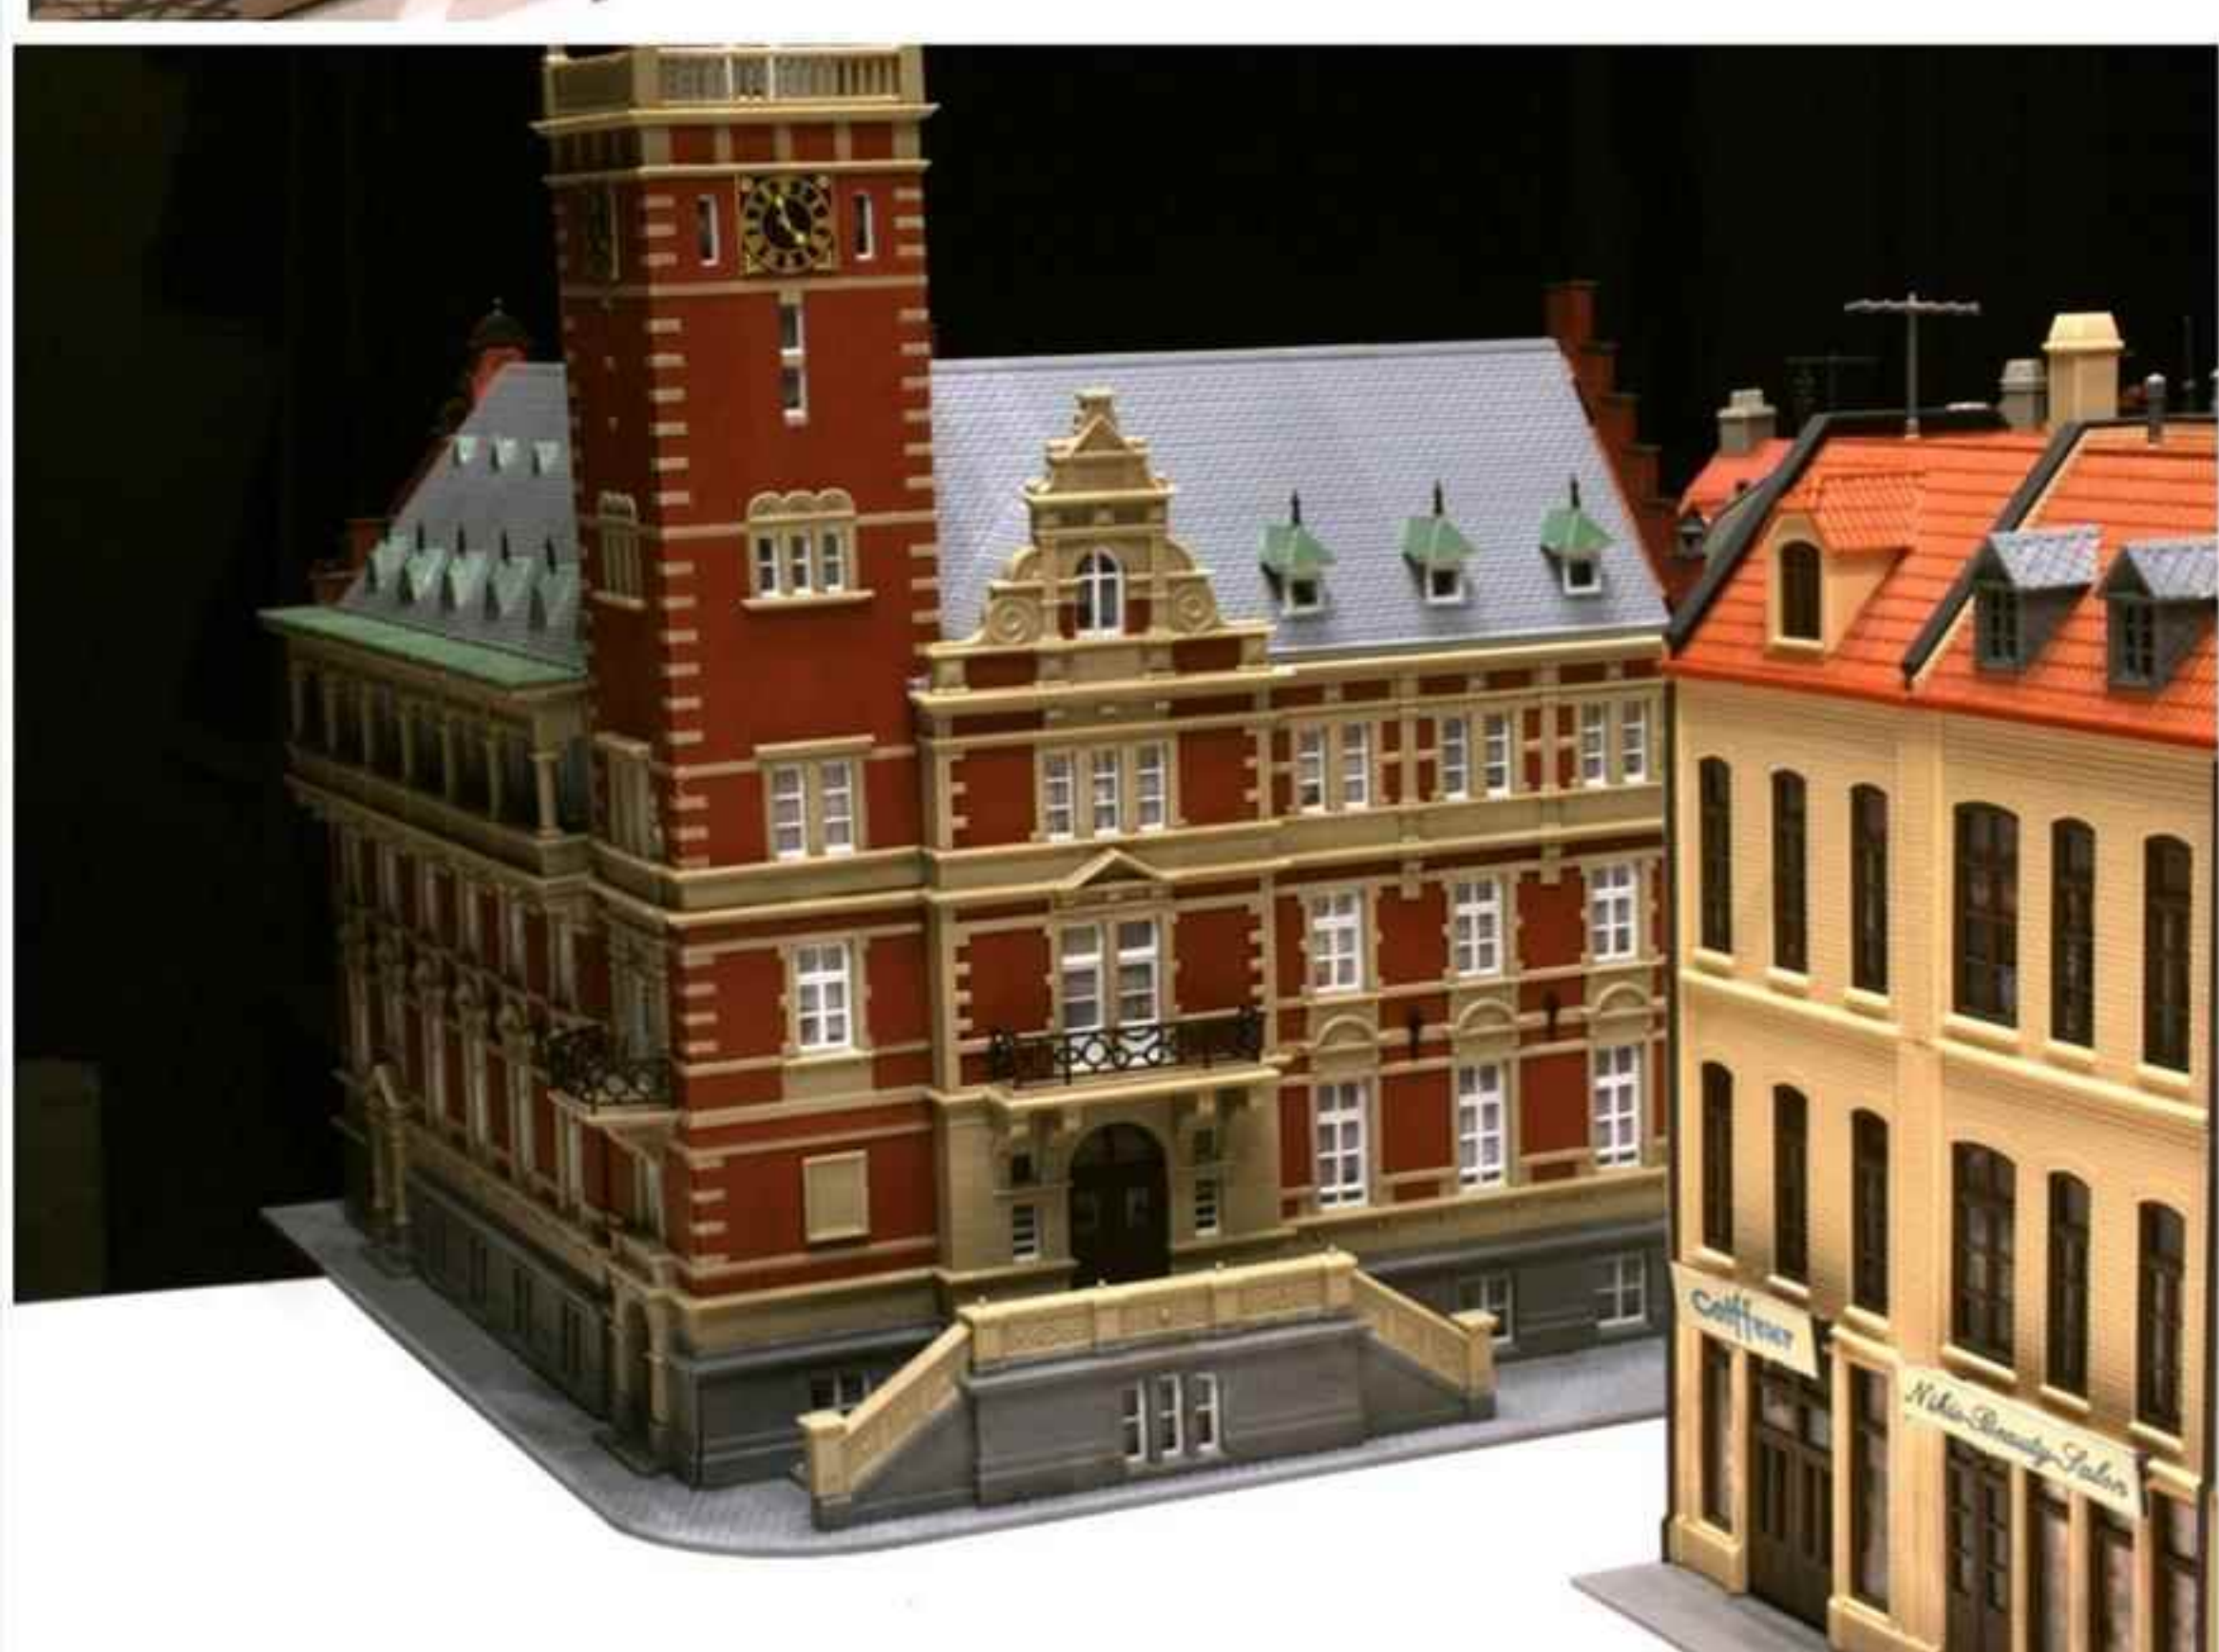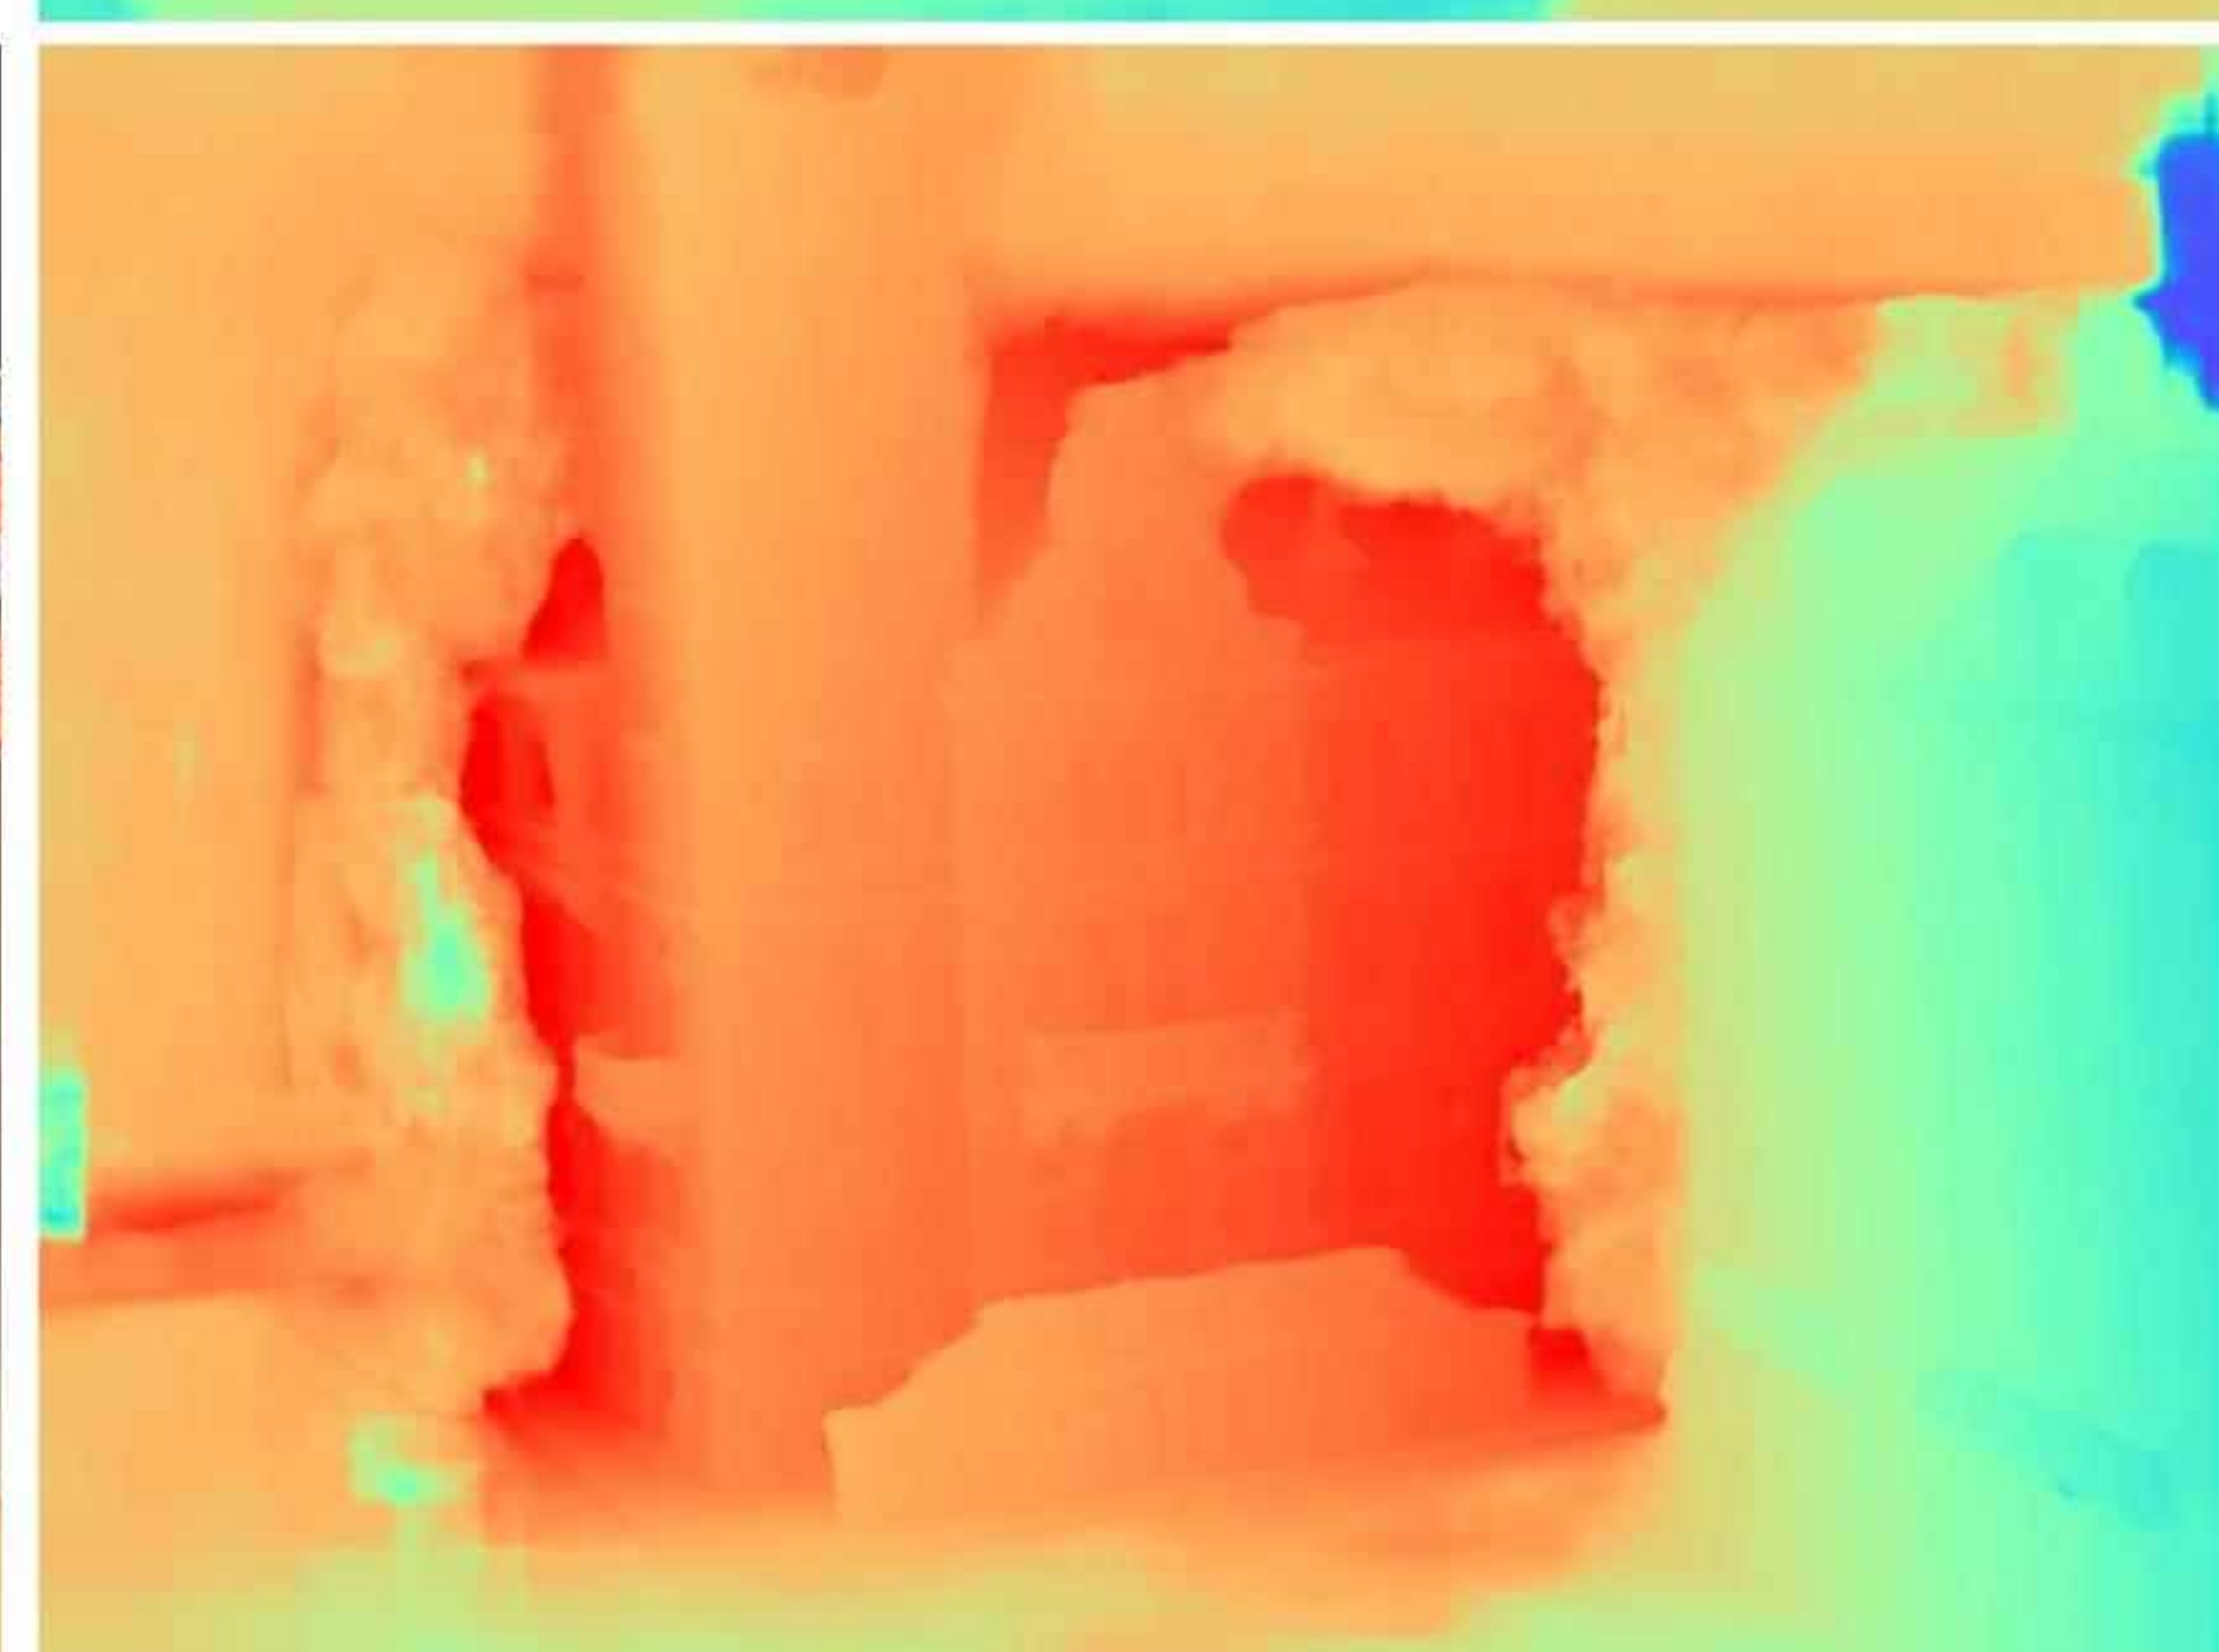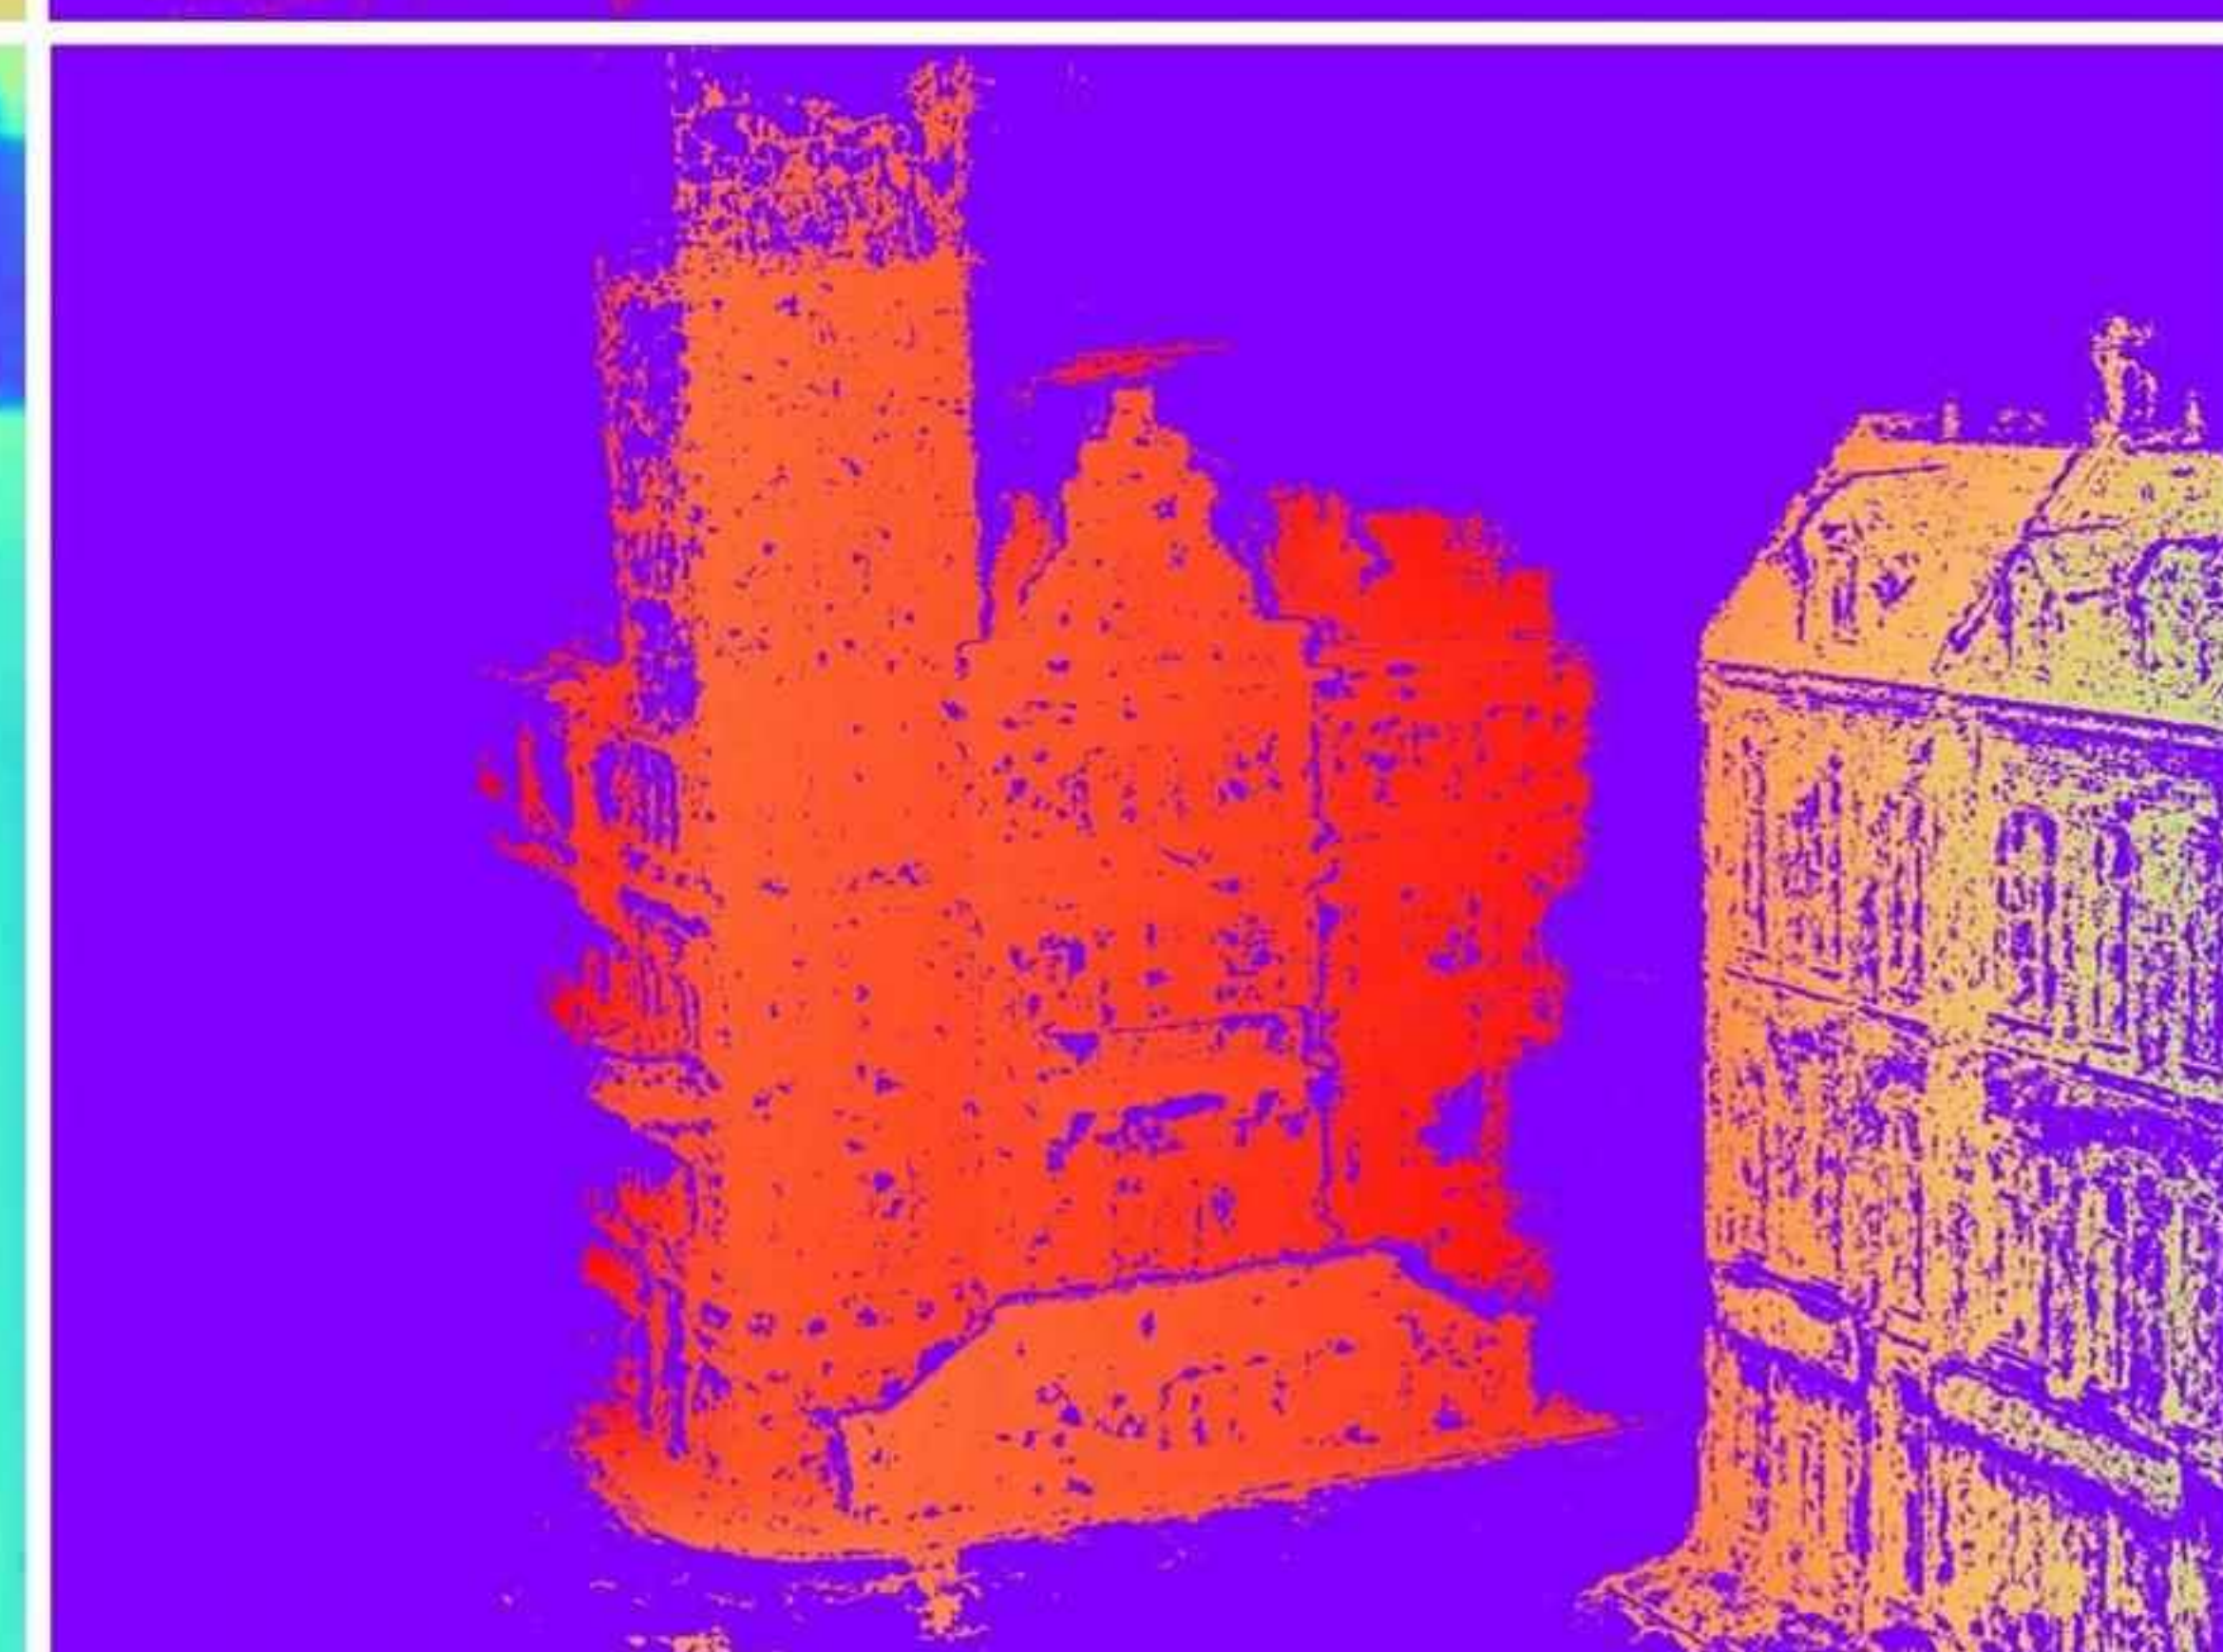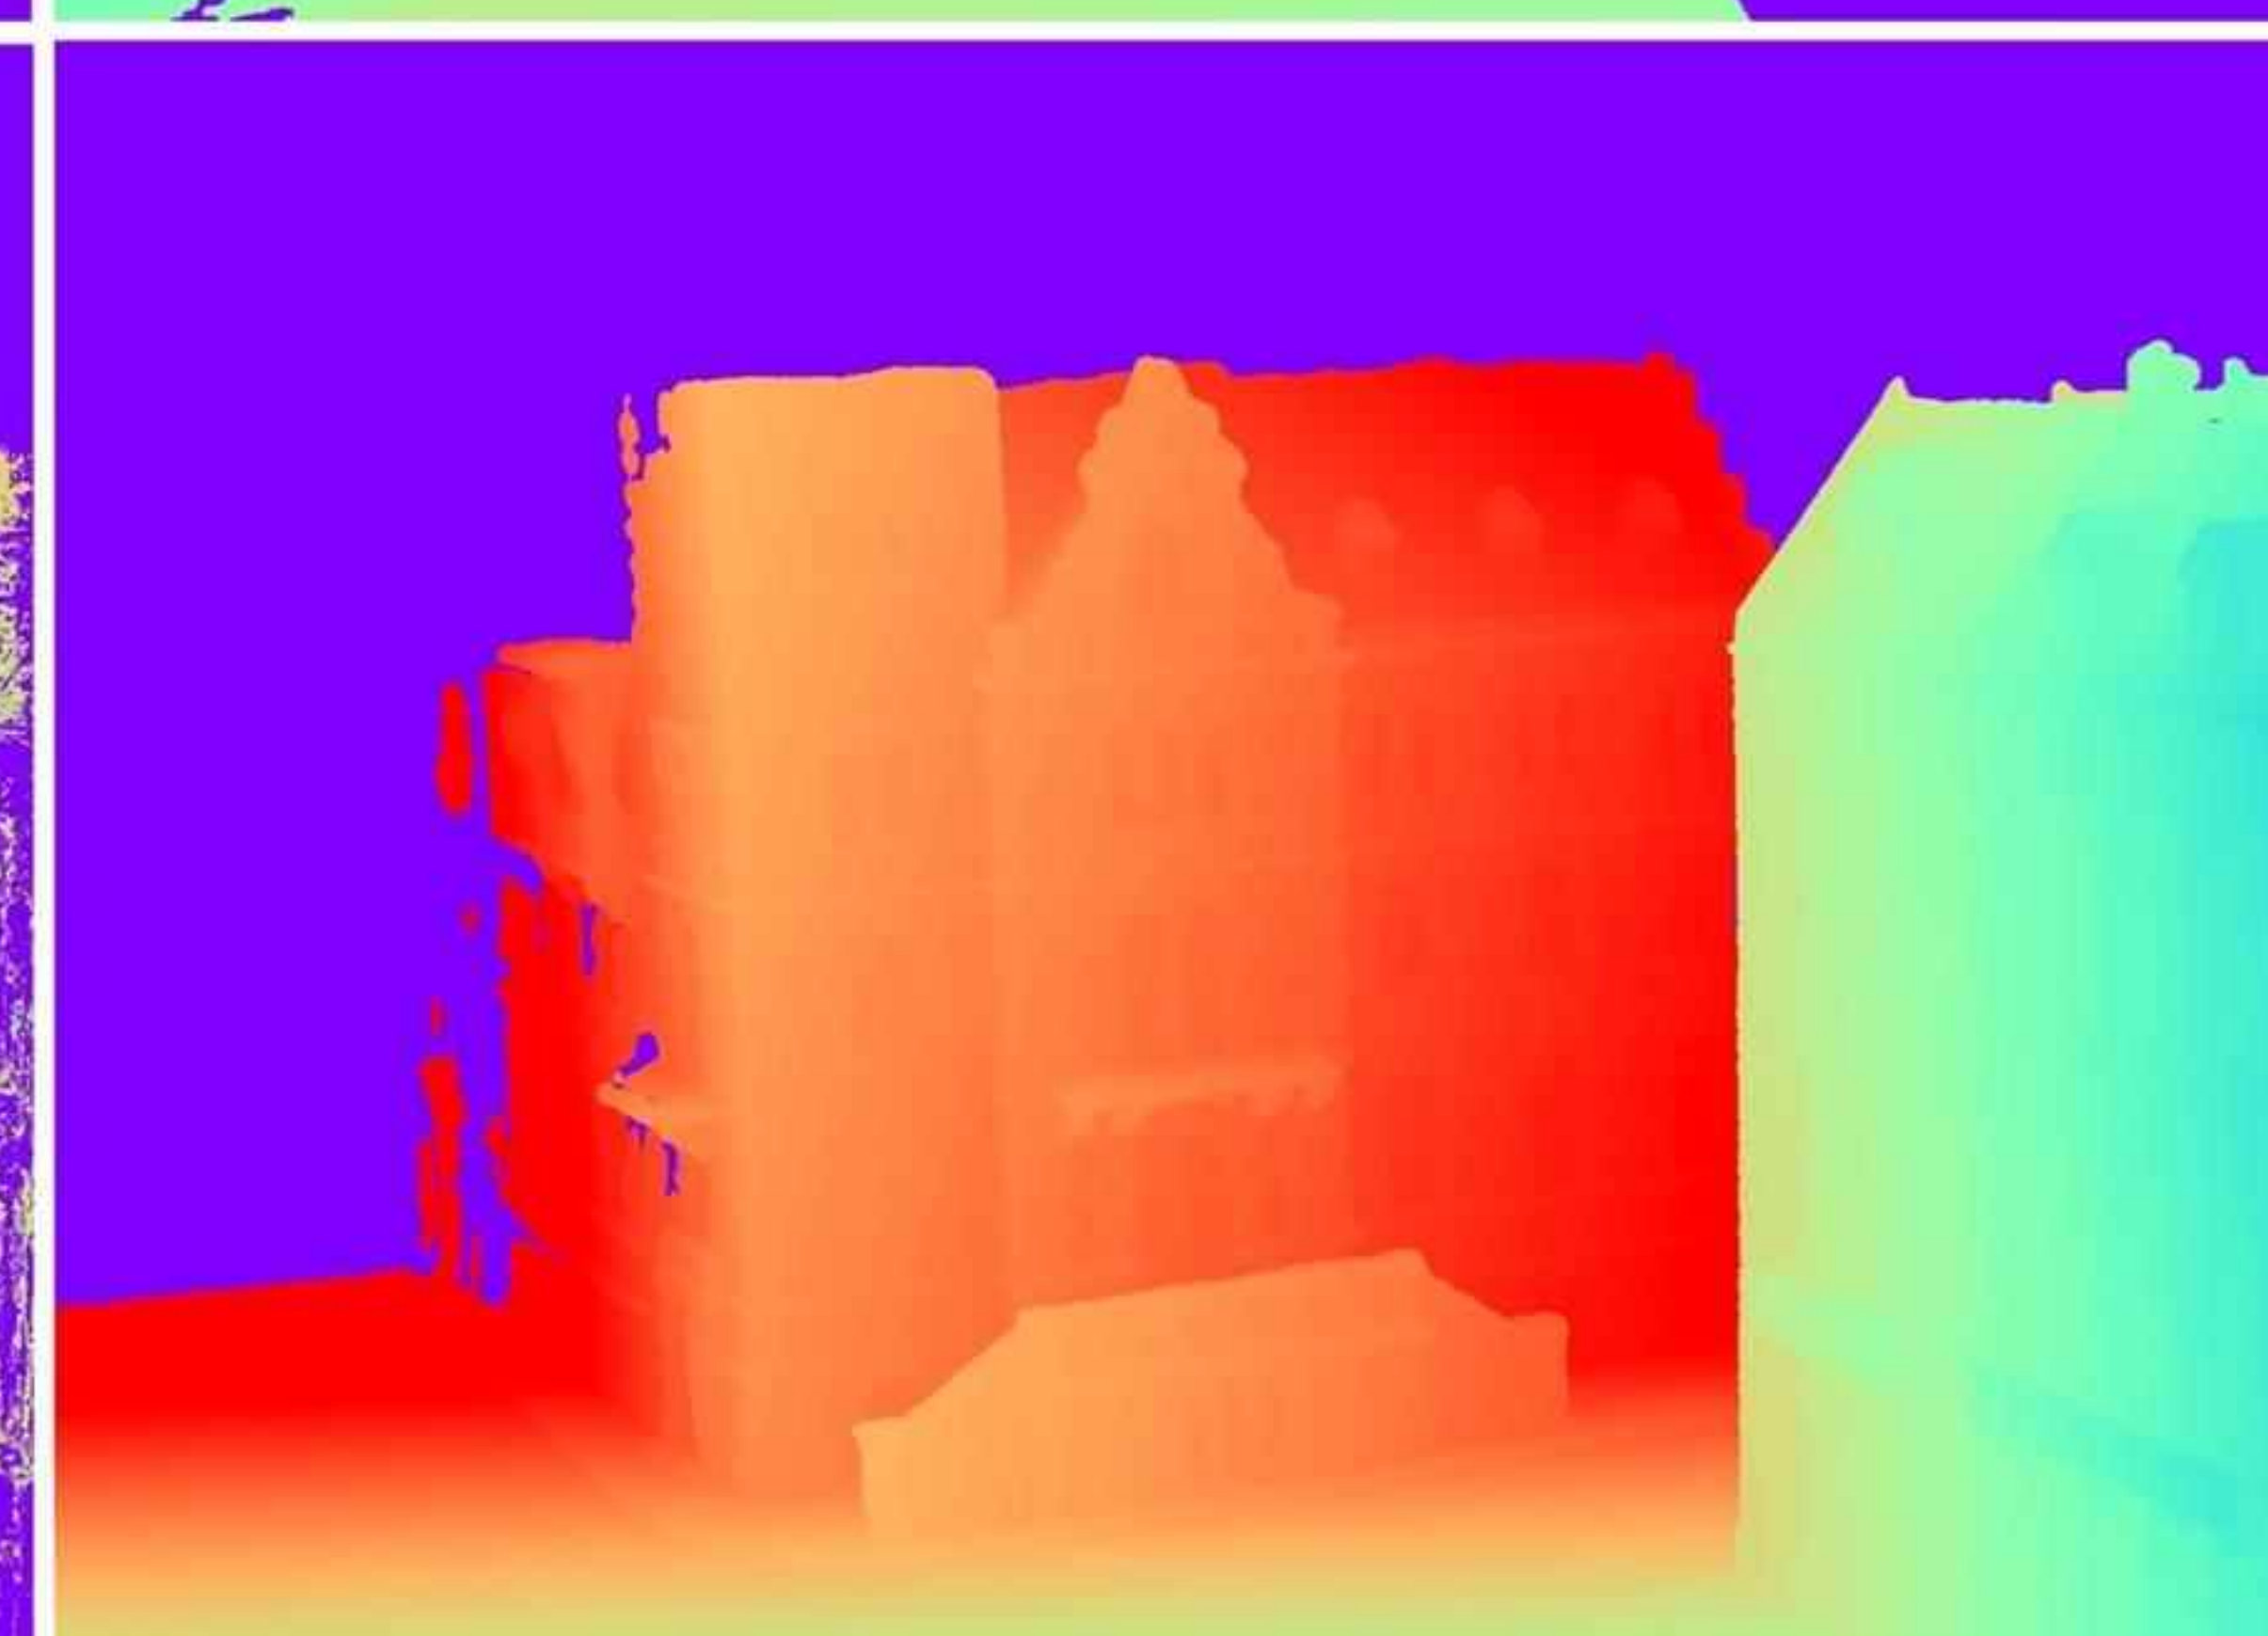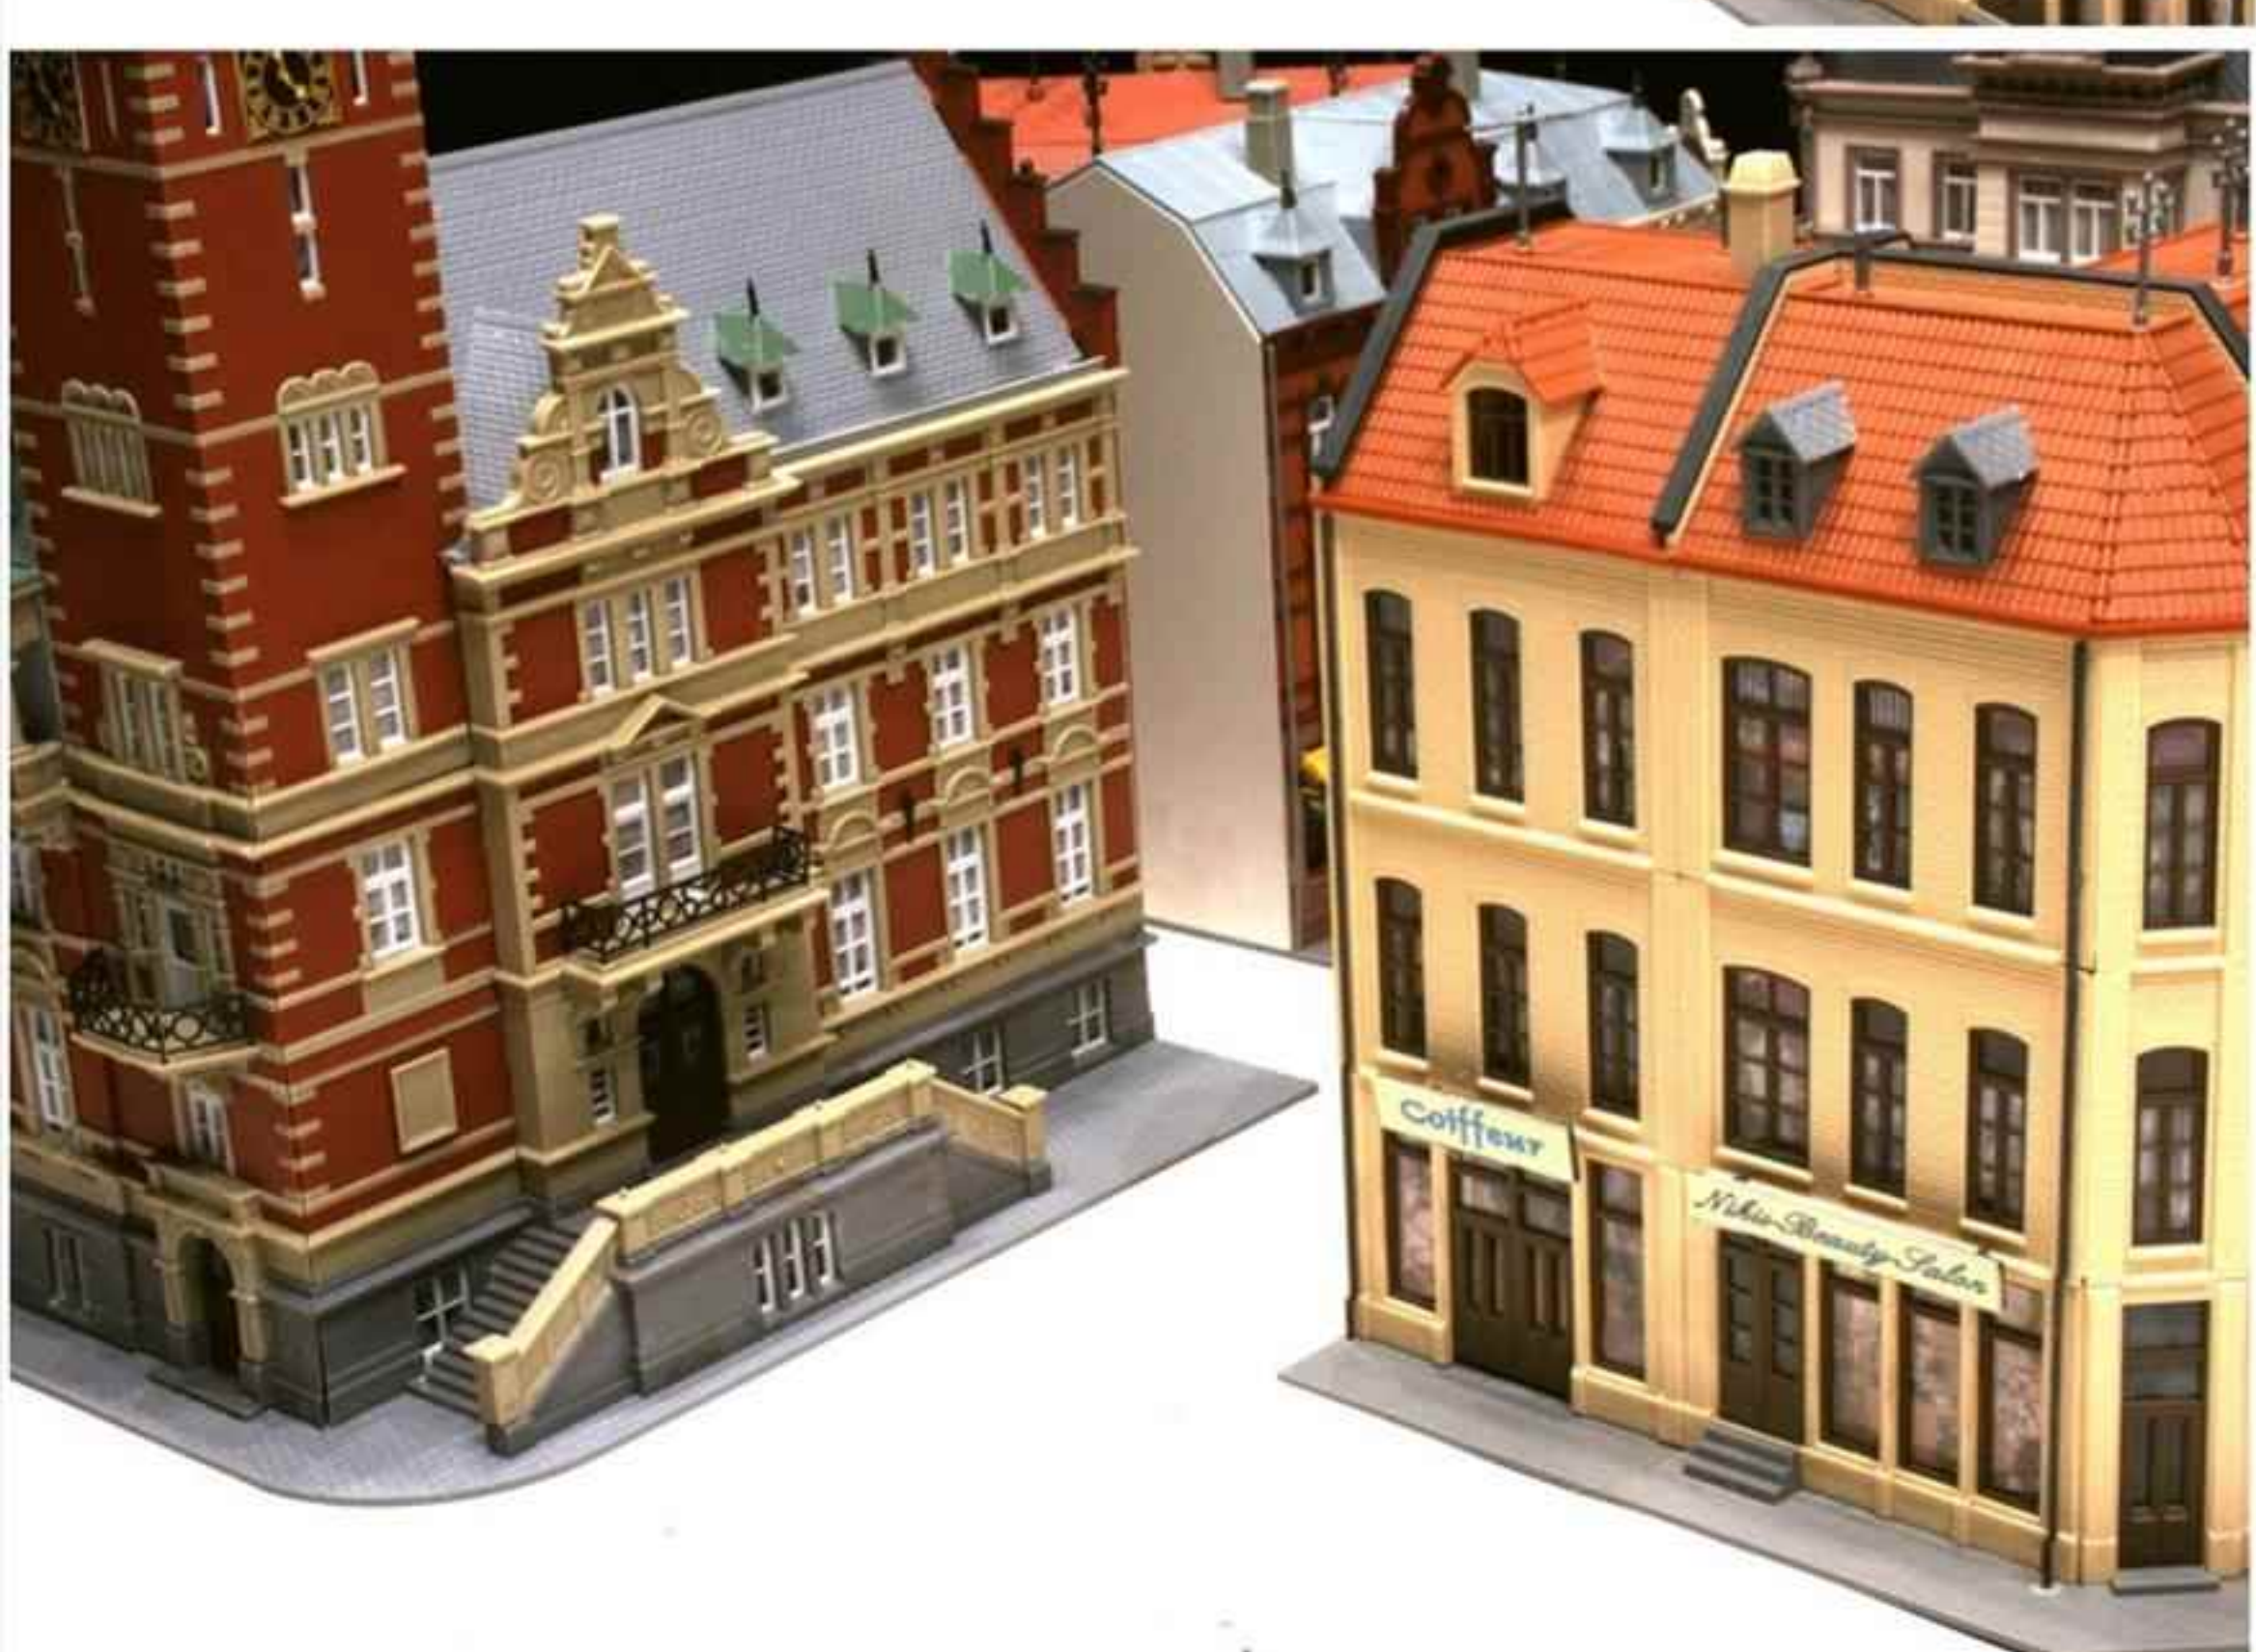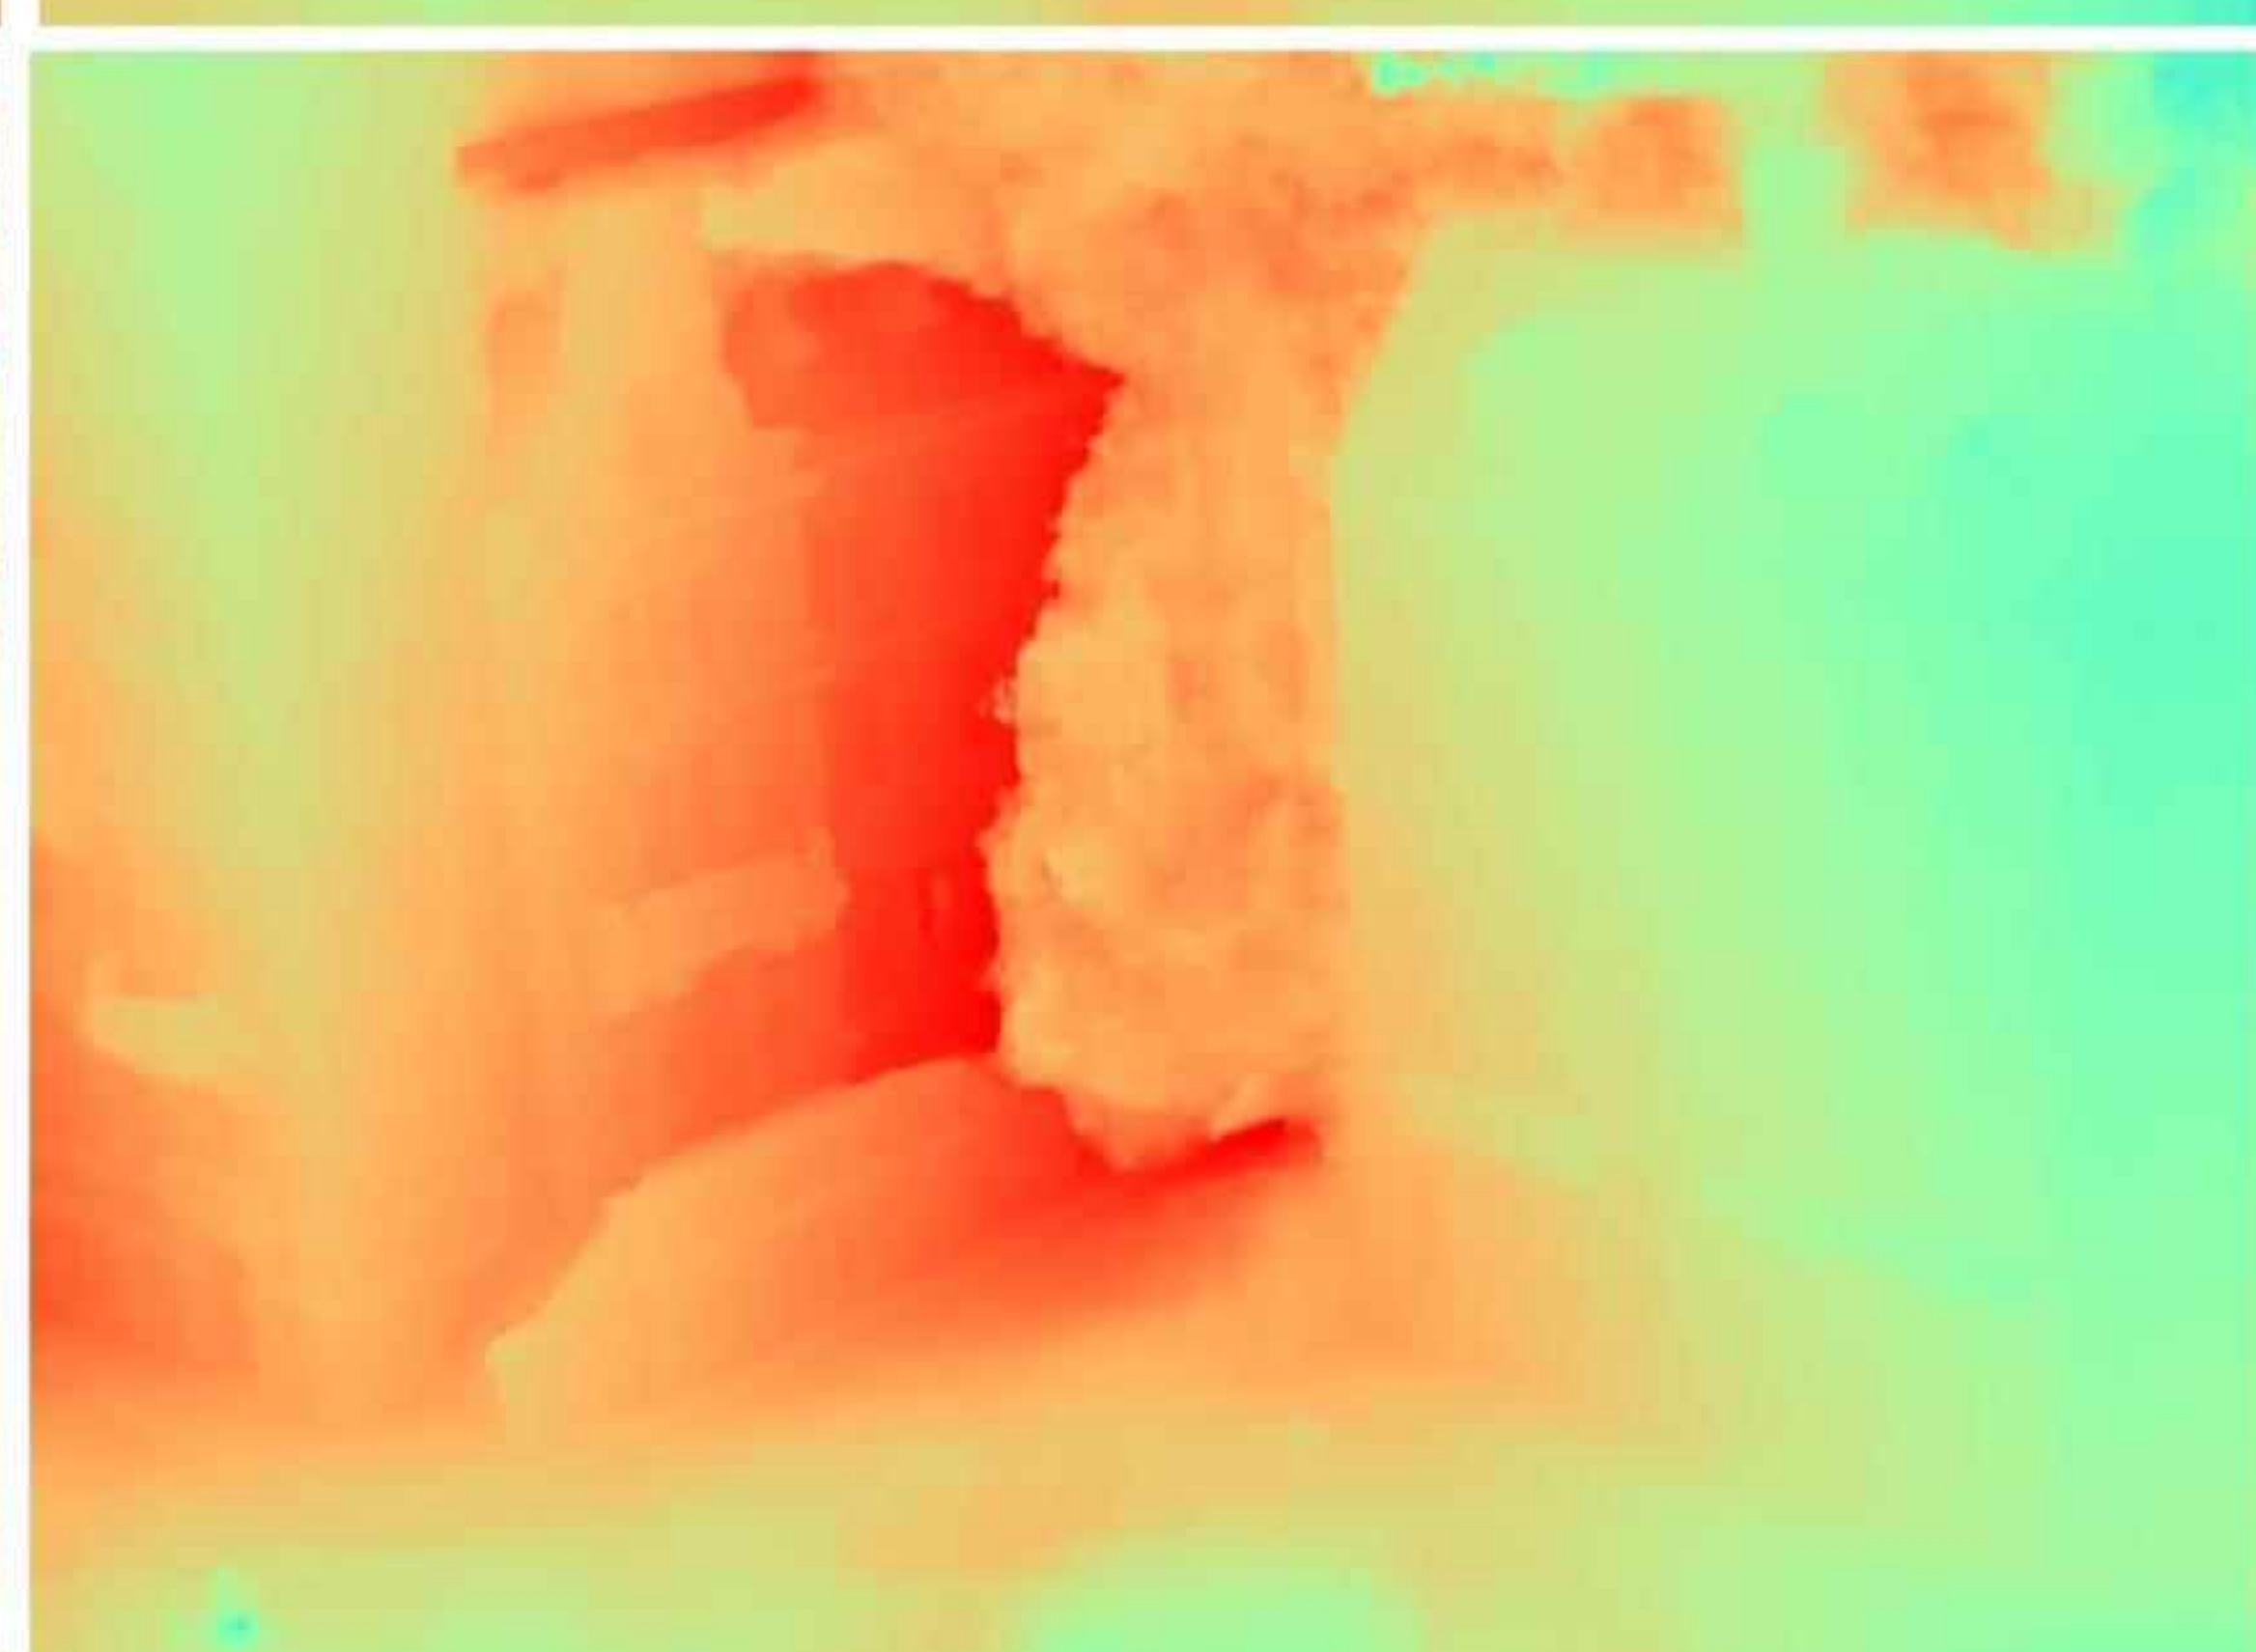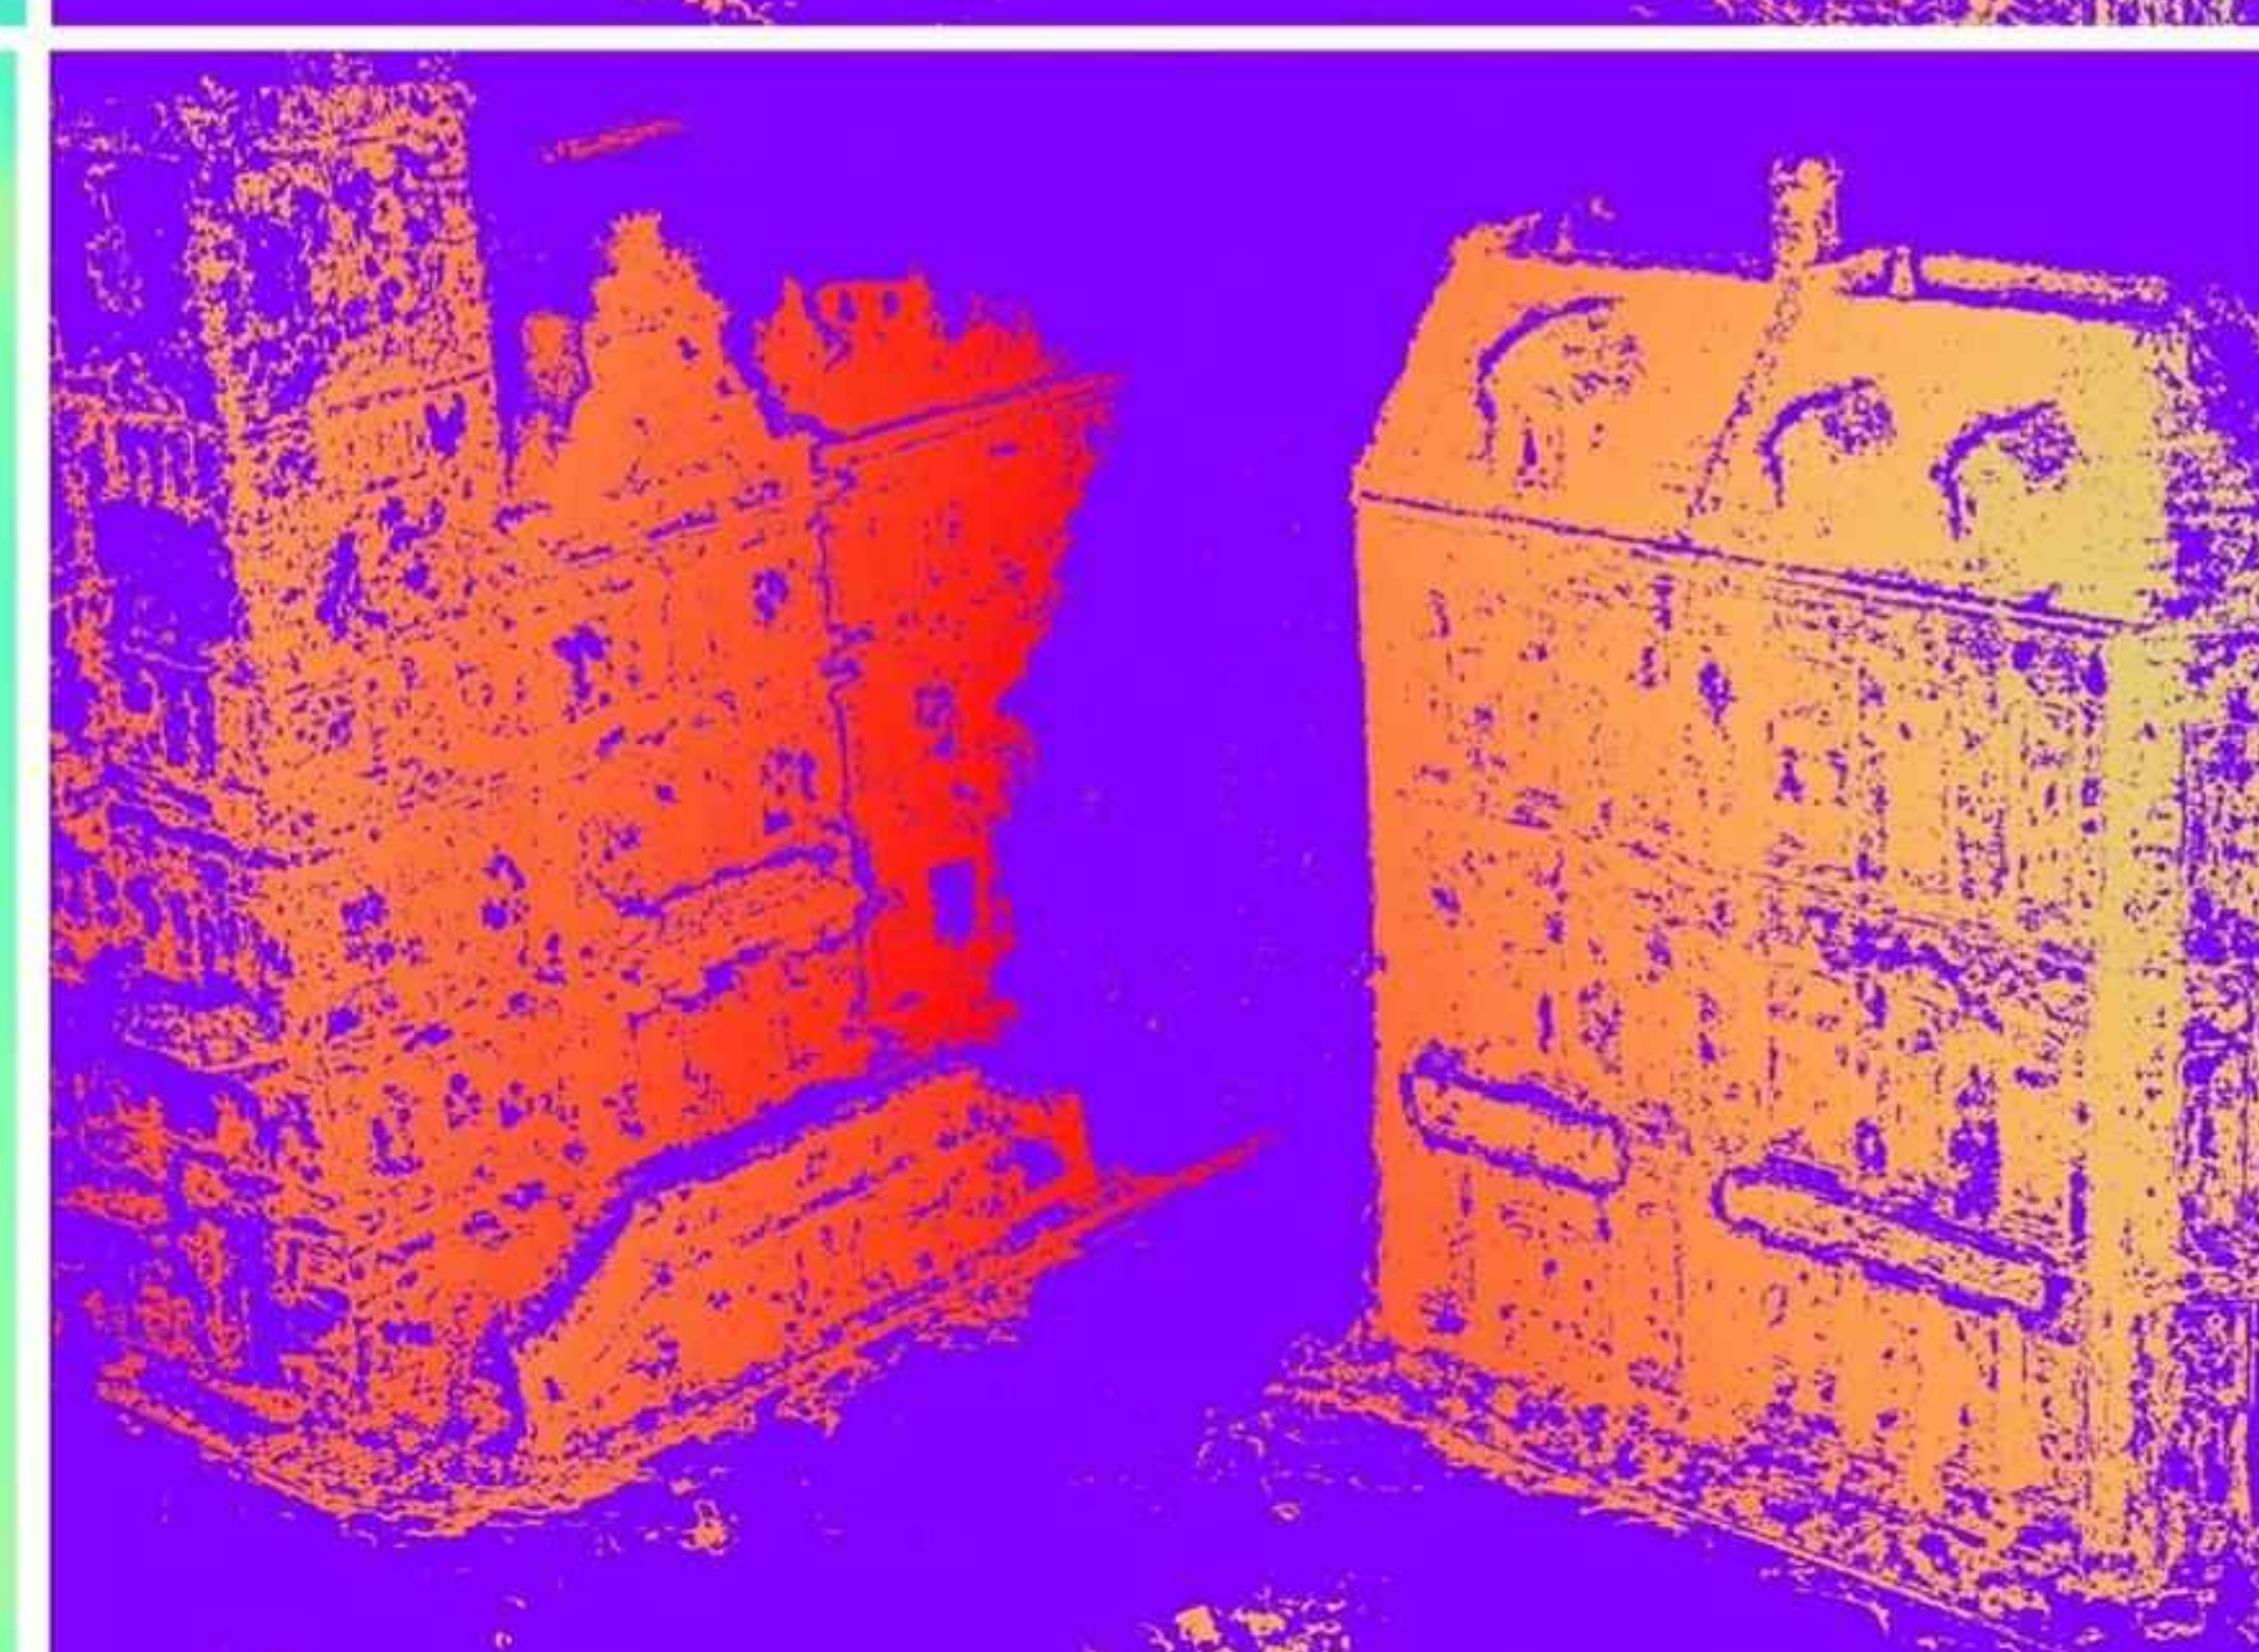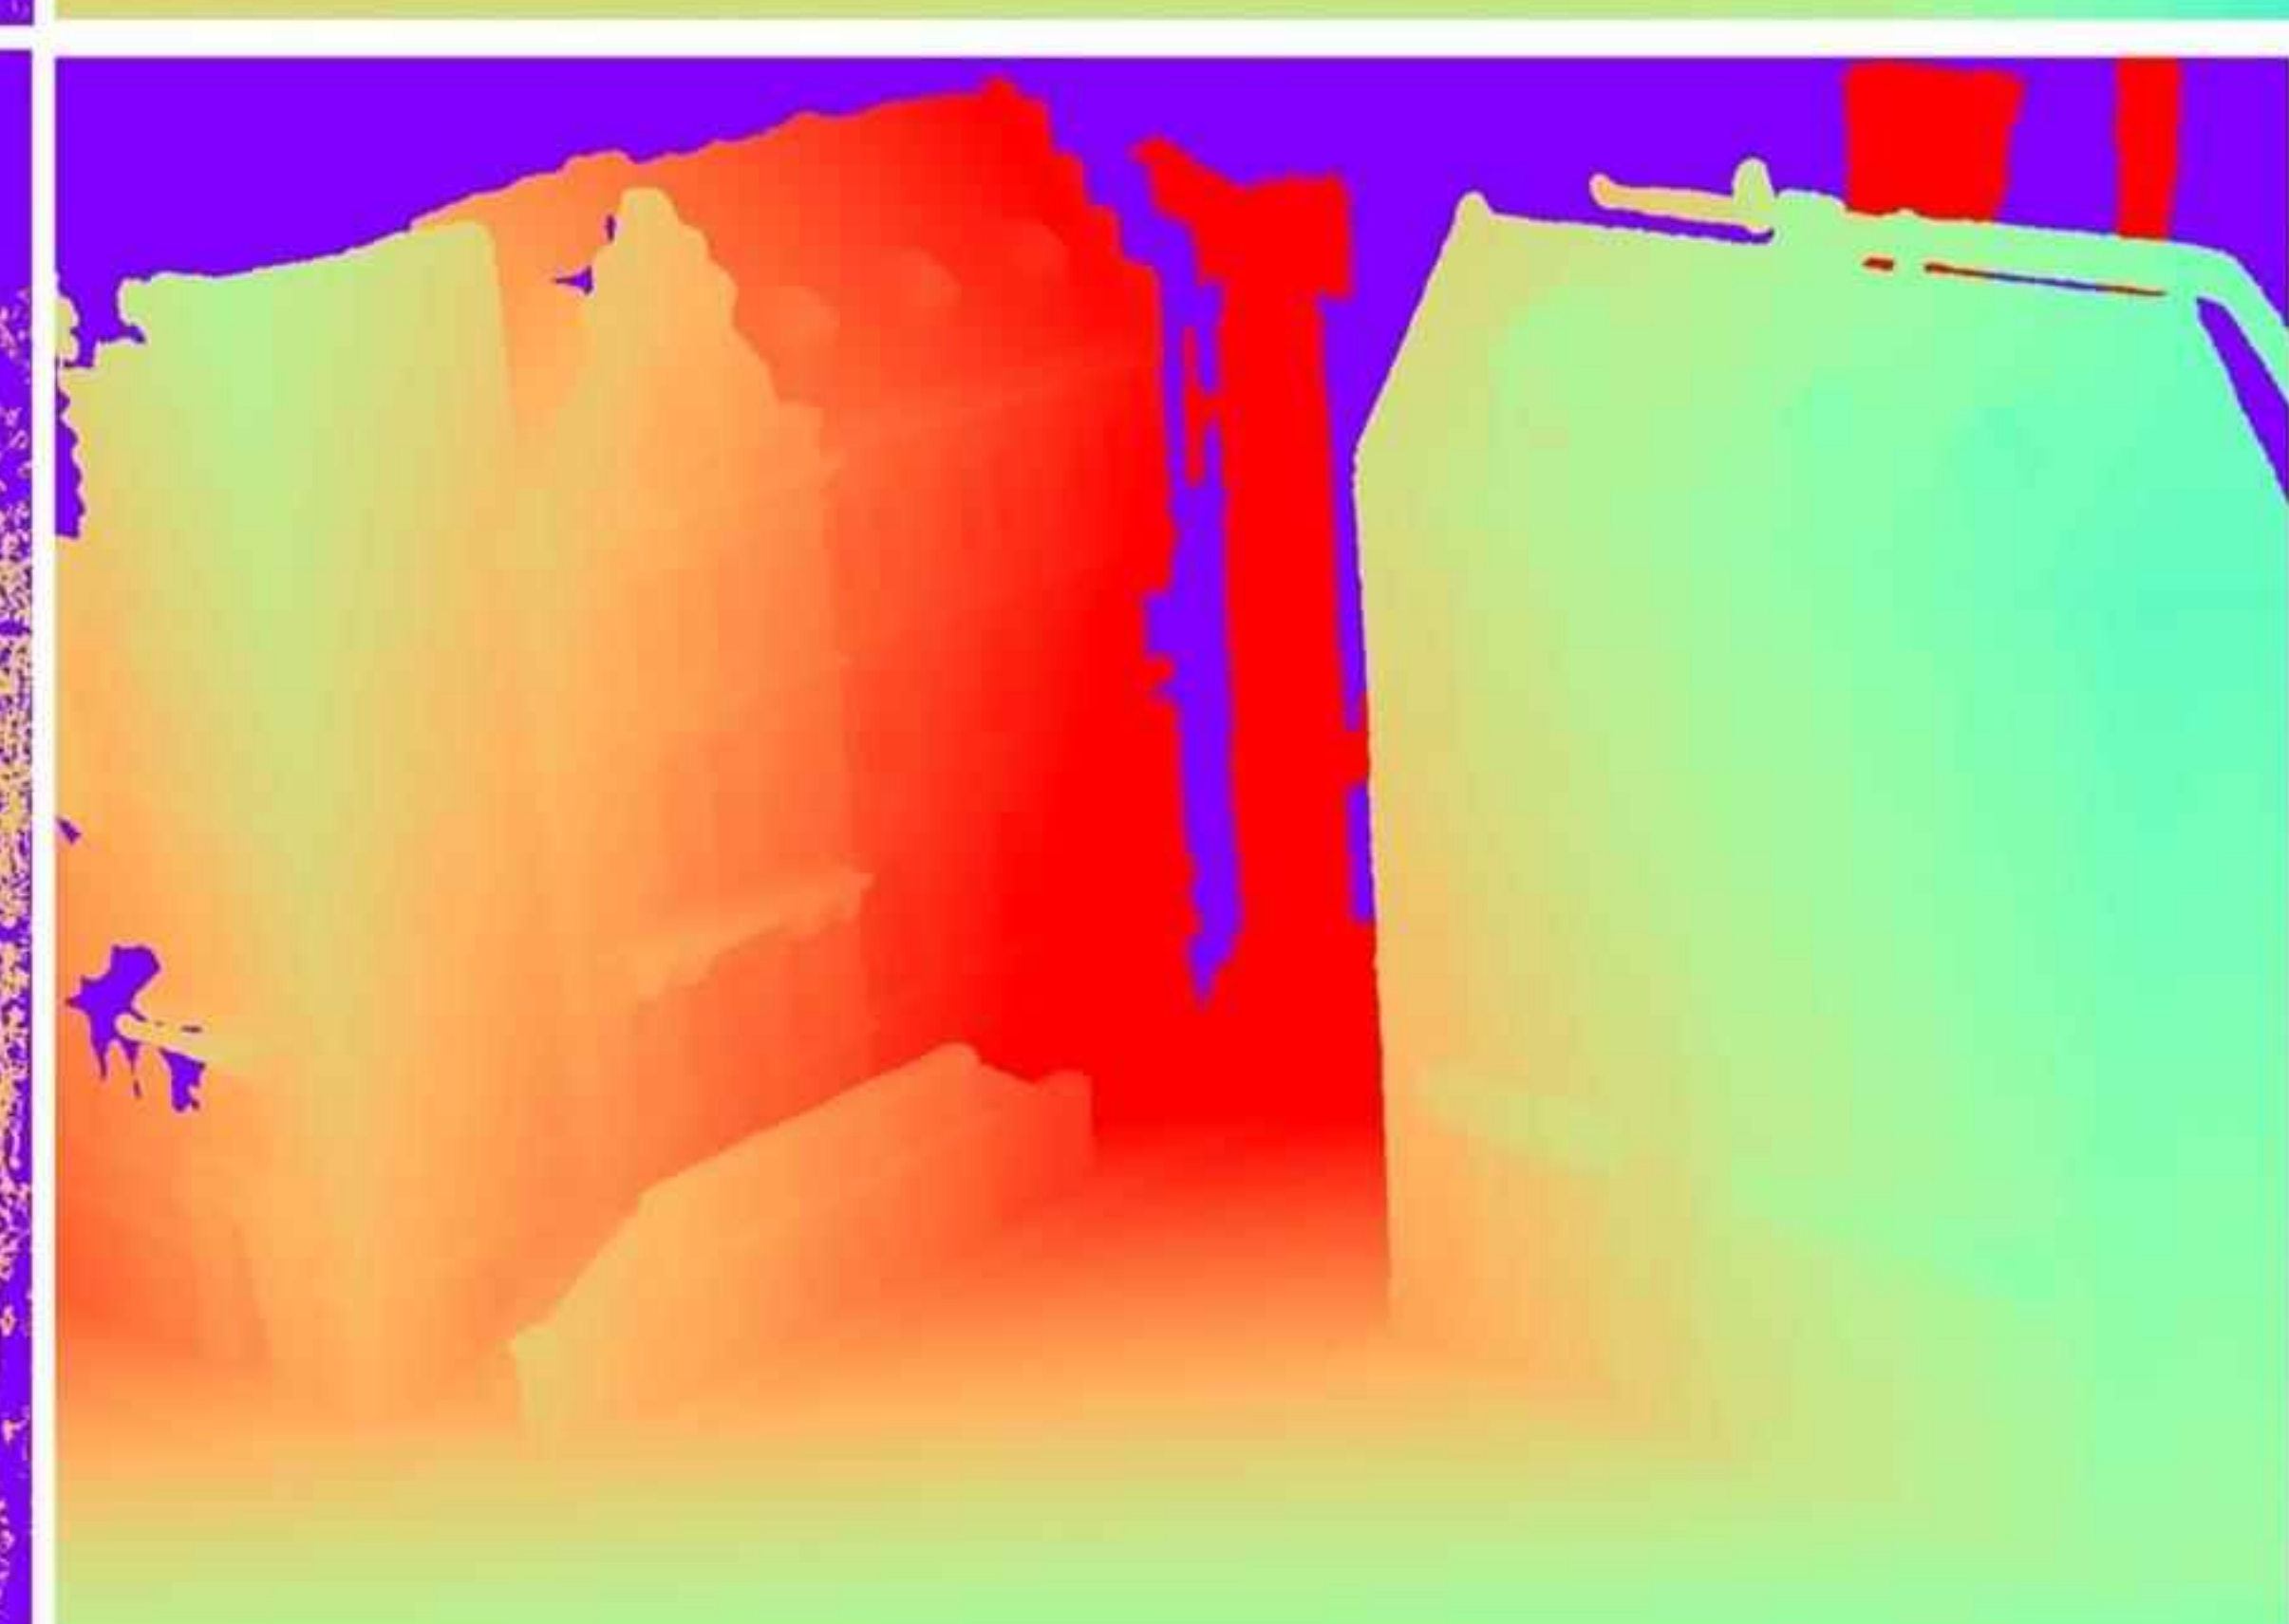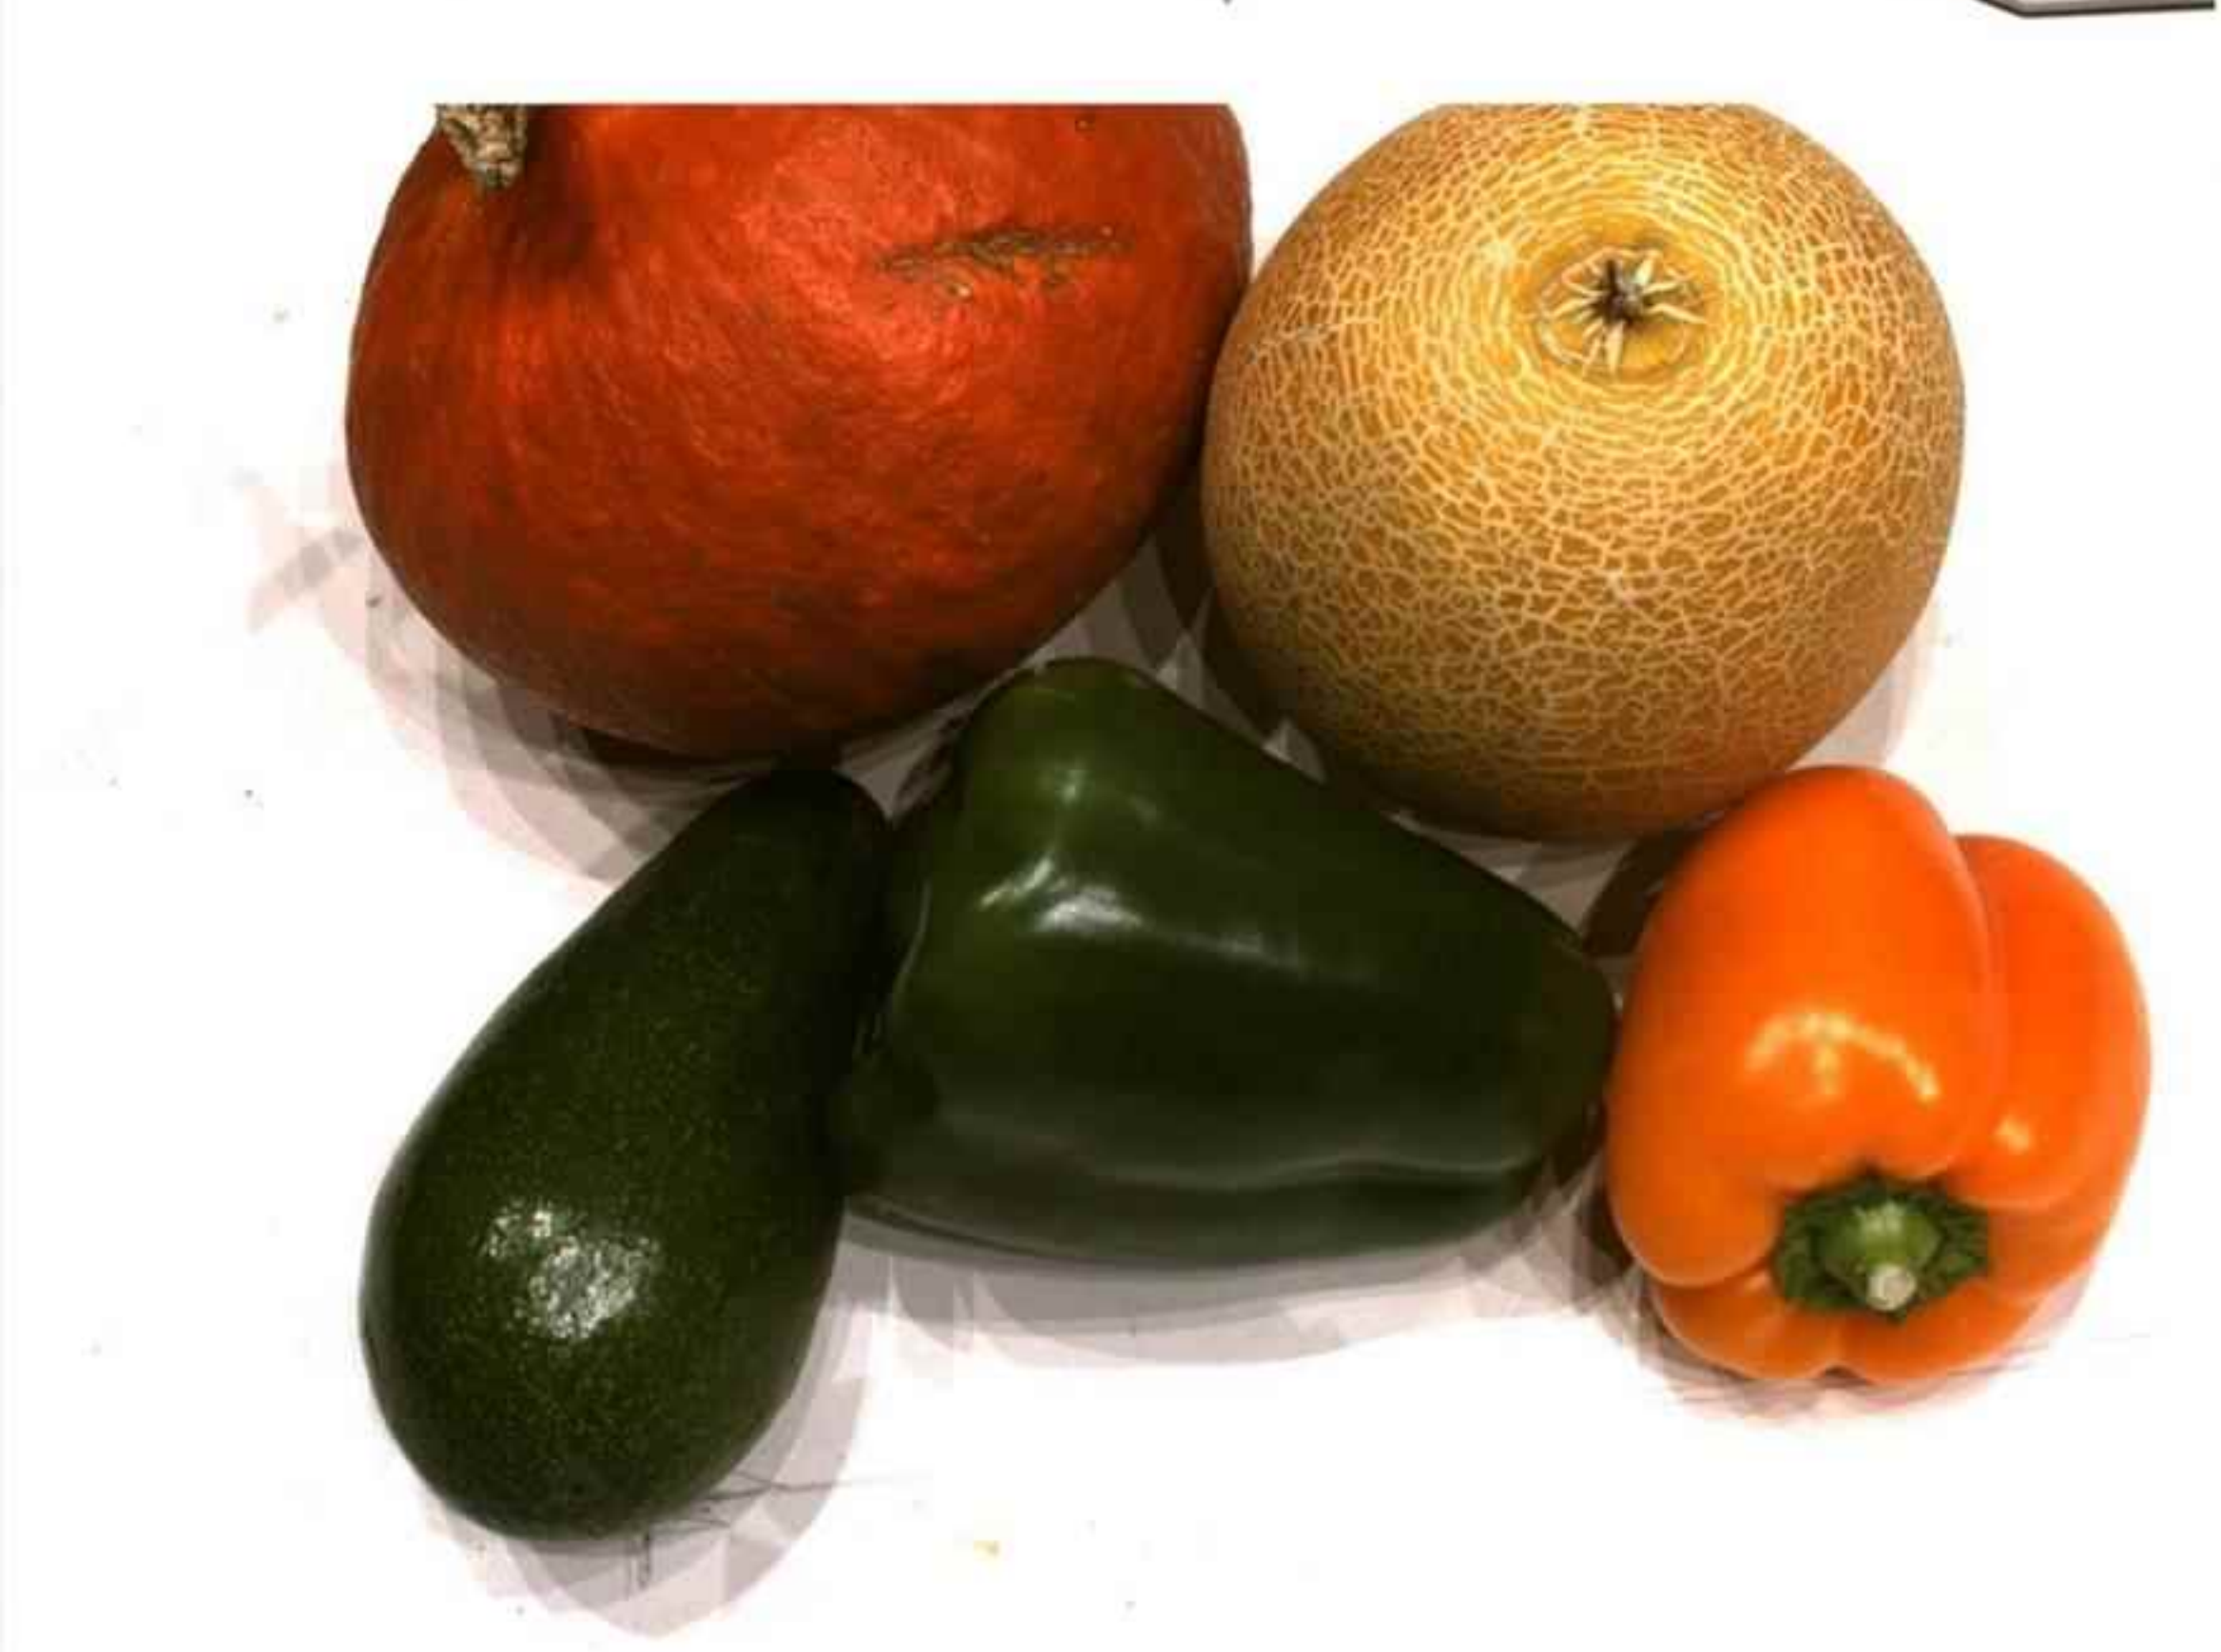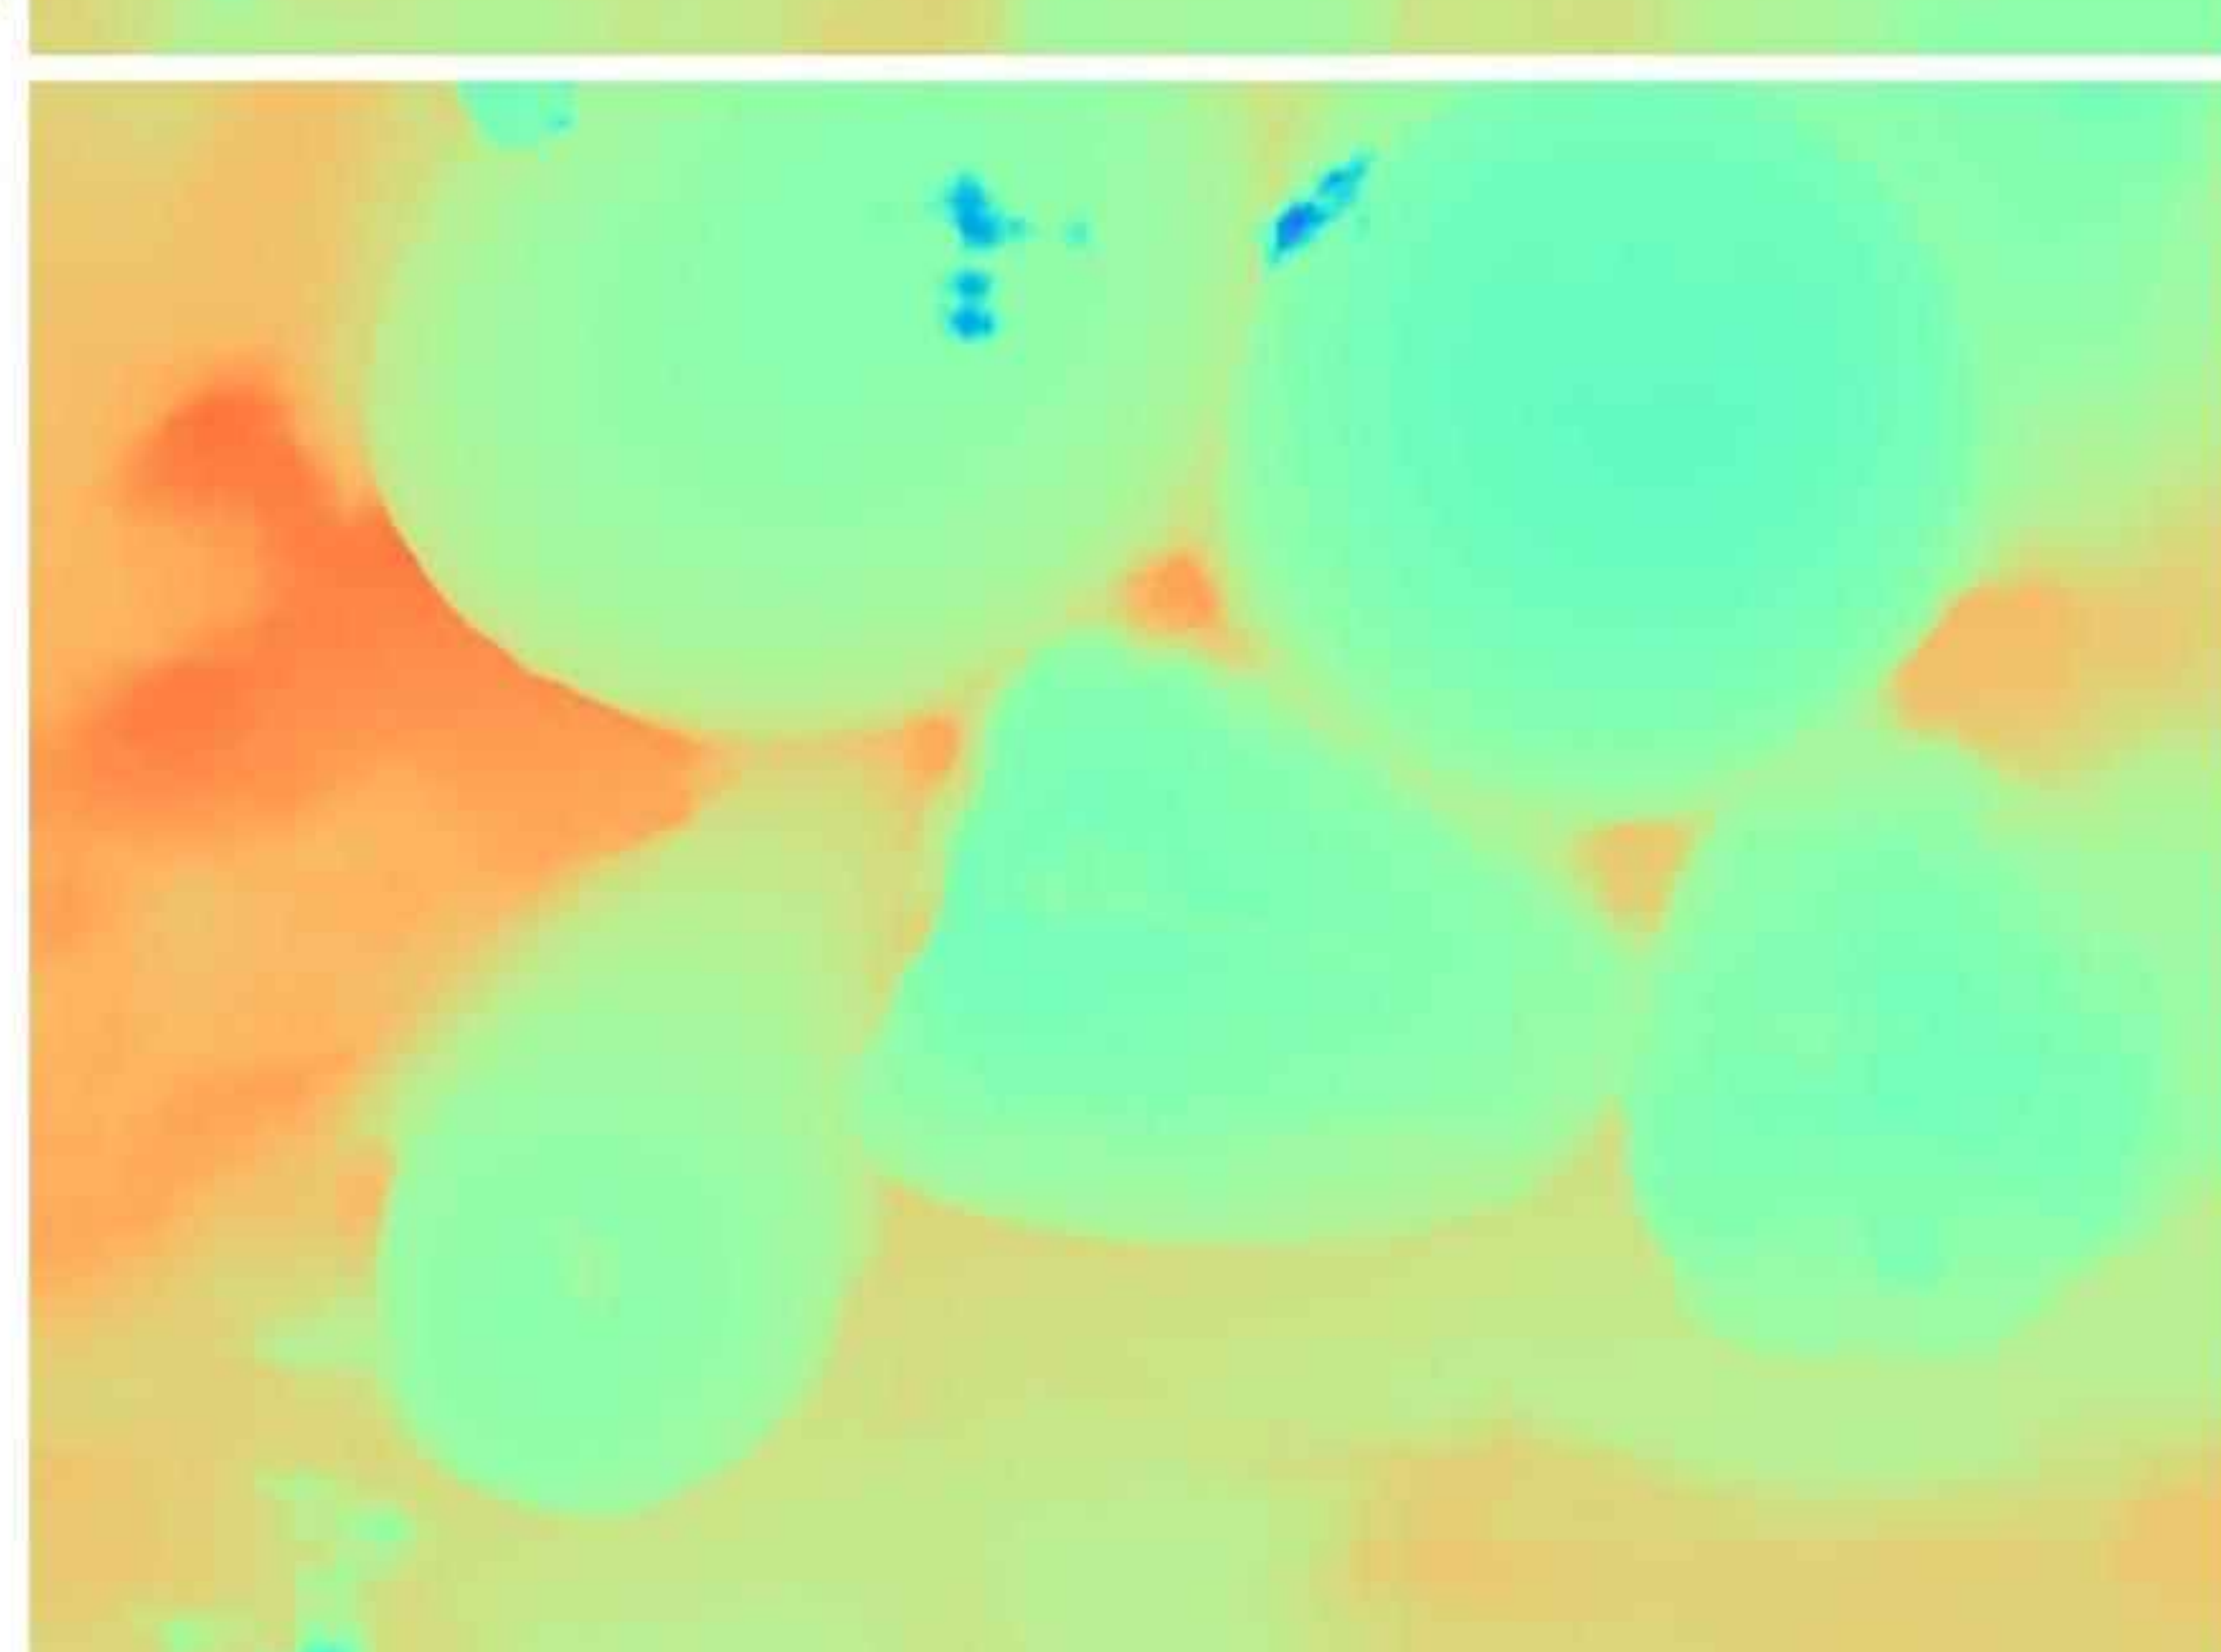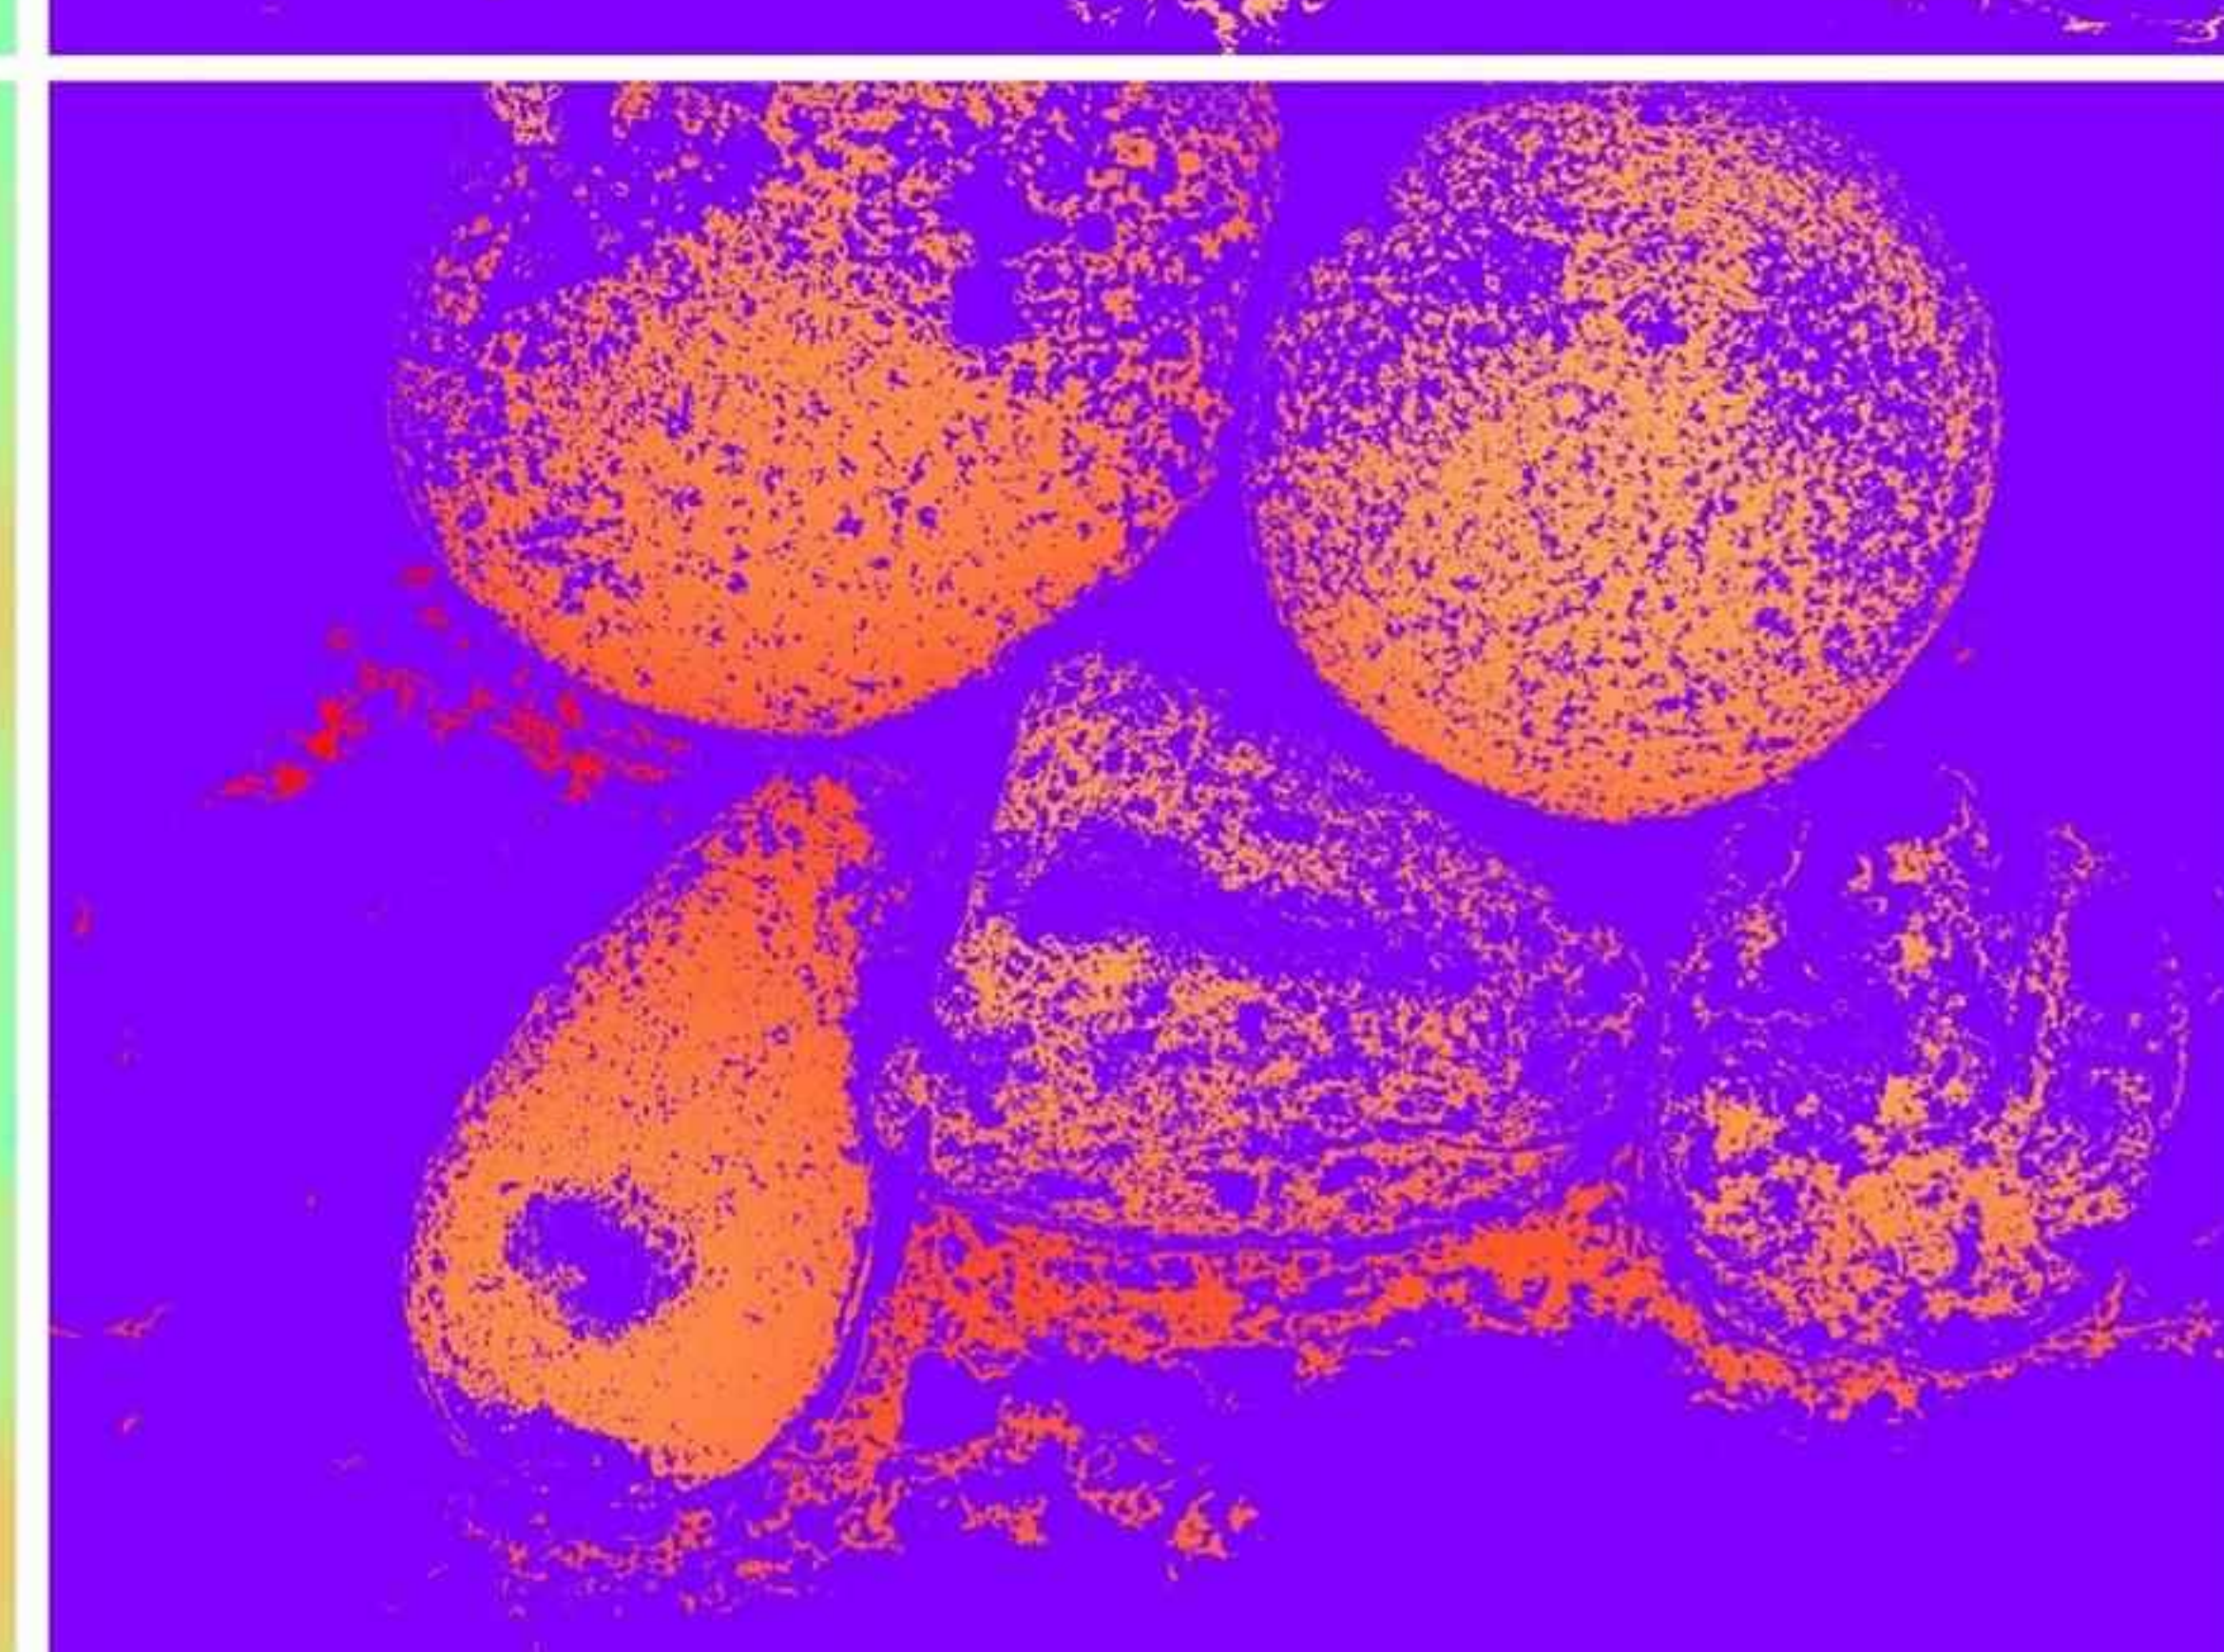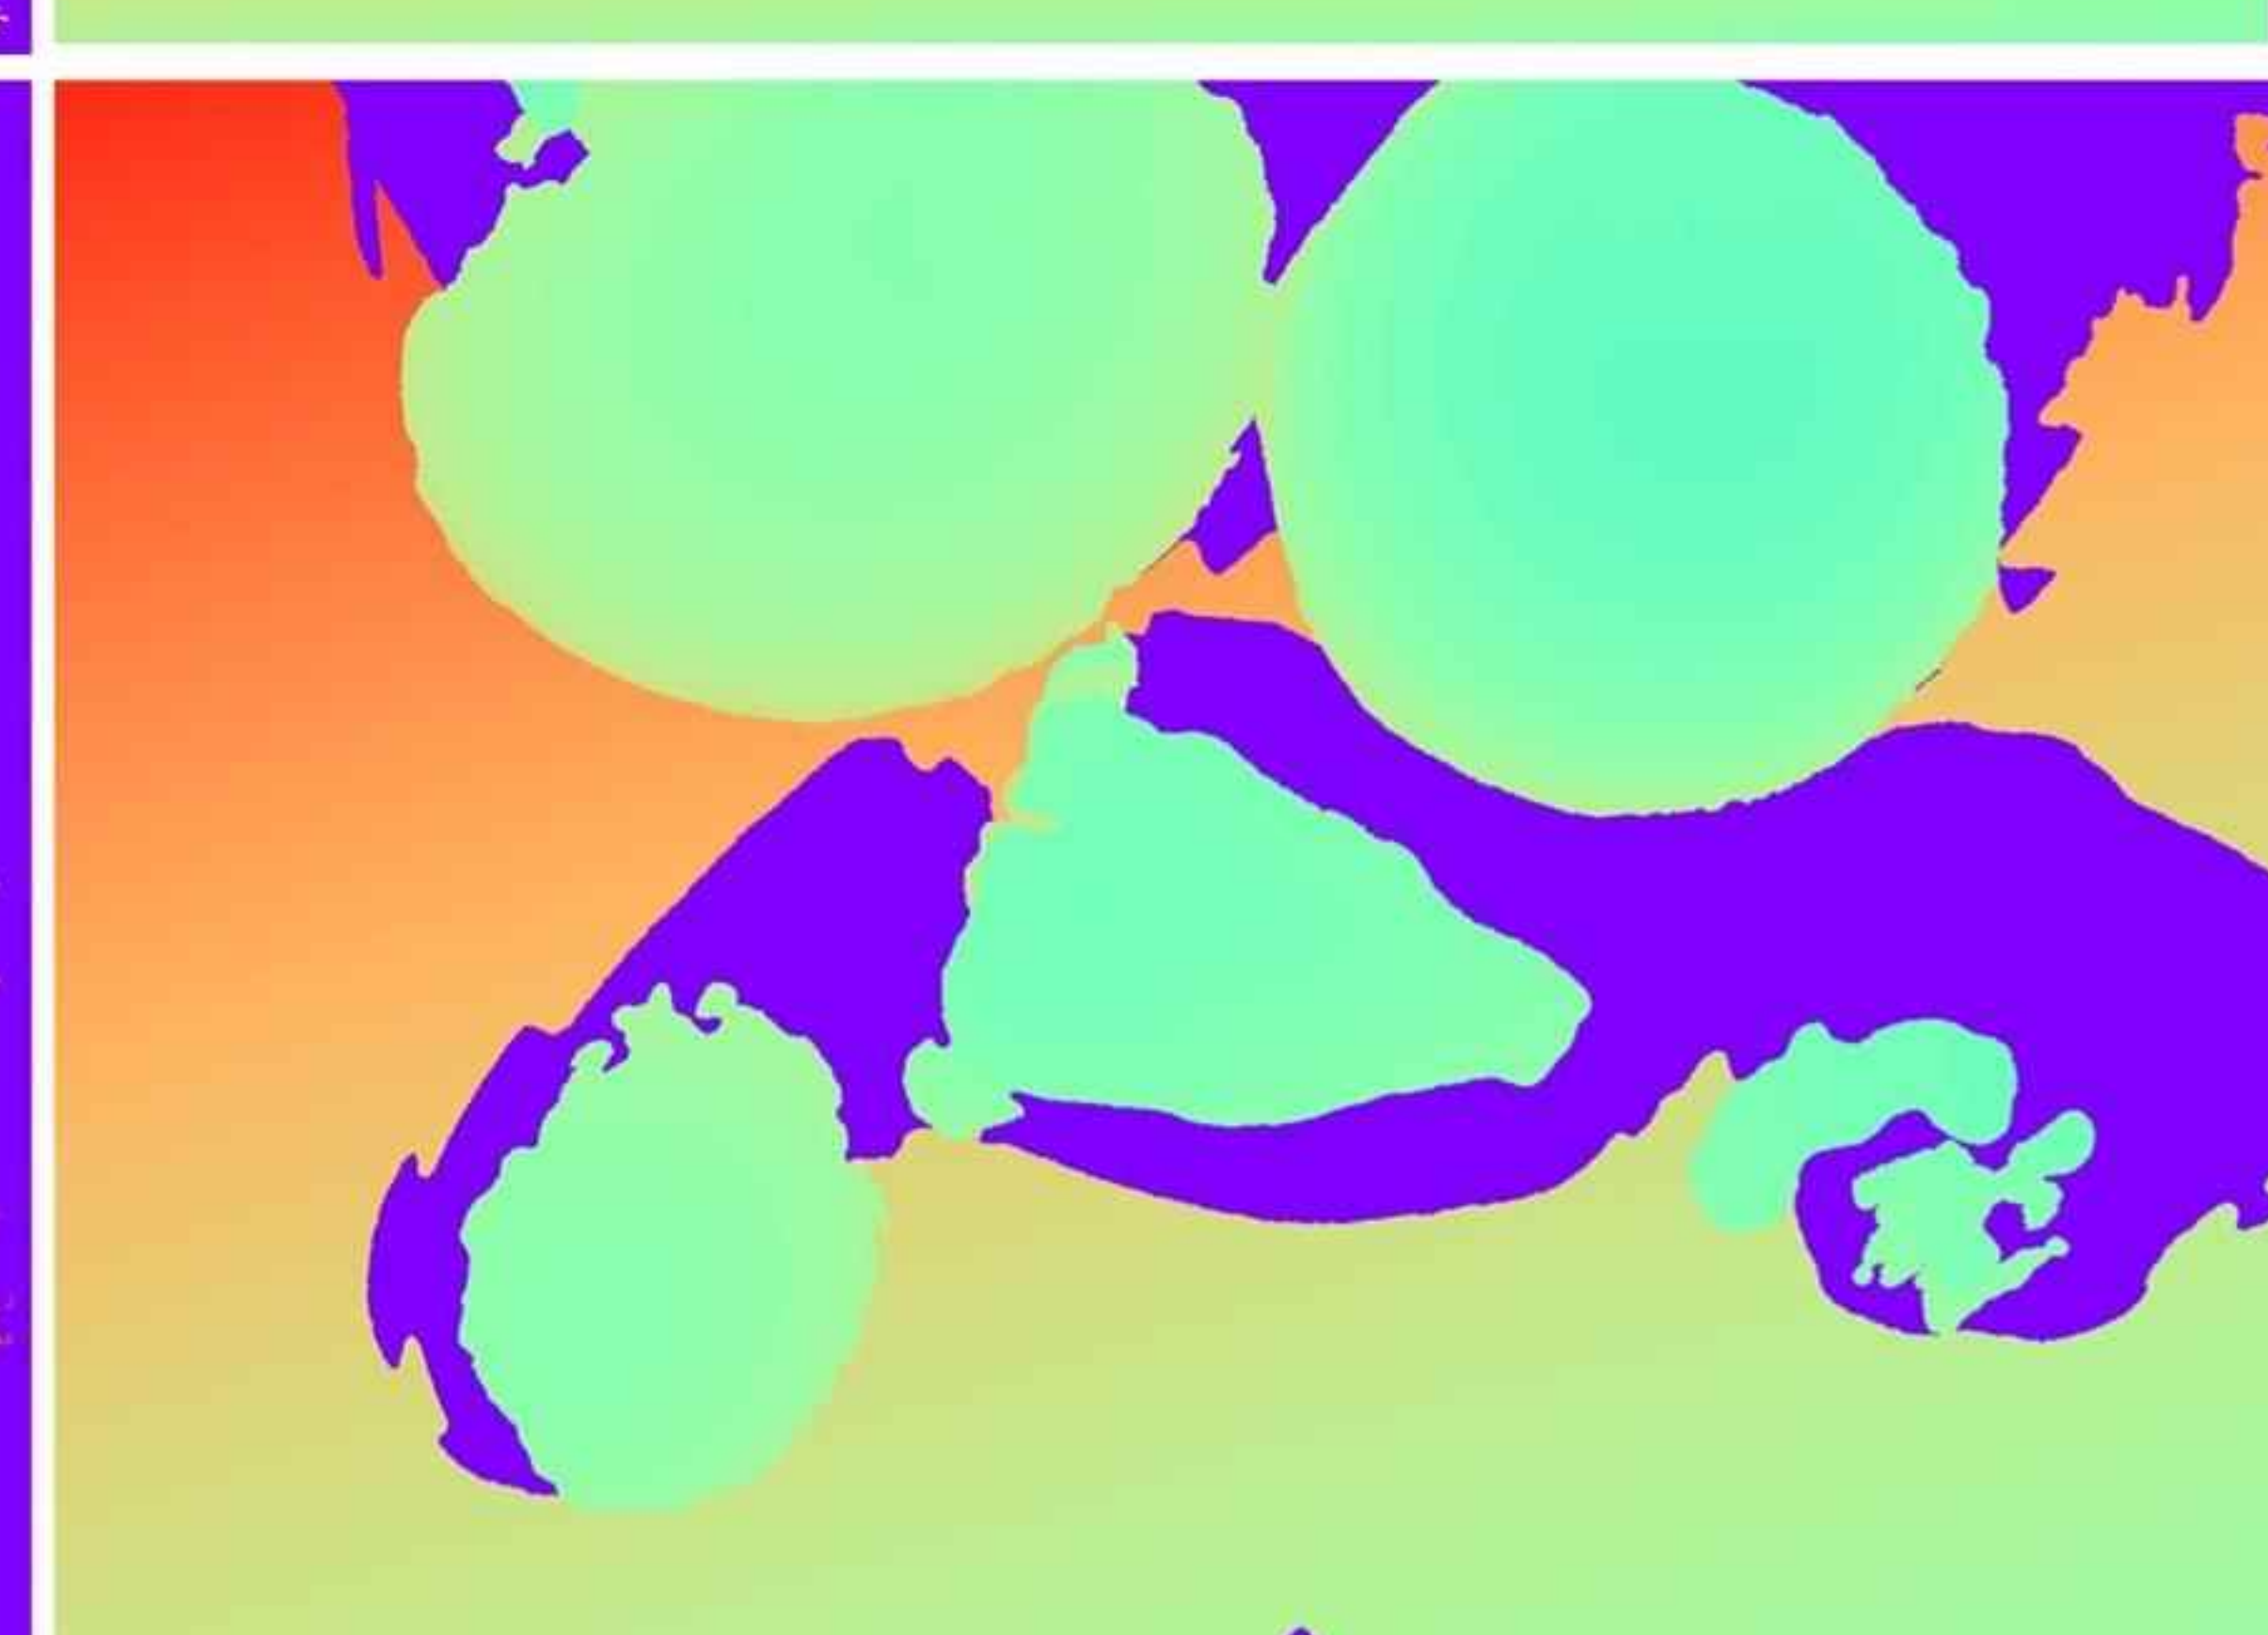

(a) Image

(b) Depth Prediction

(c) Filtered Depth

(d) Ground Truth

Supplement: Supplementary file 2 [file 136910649-supp.zip]

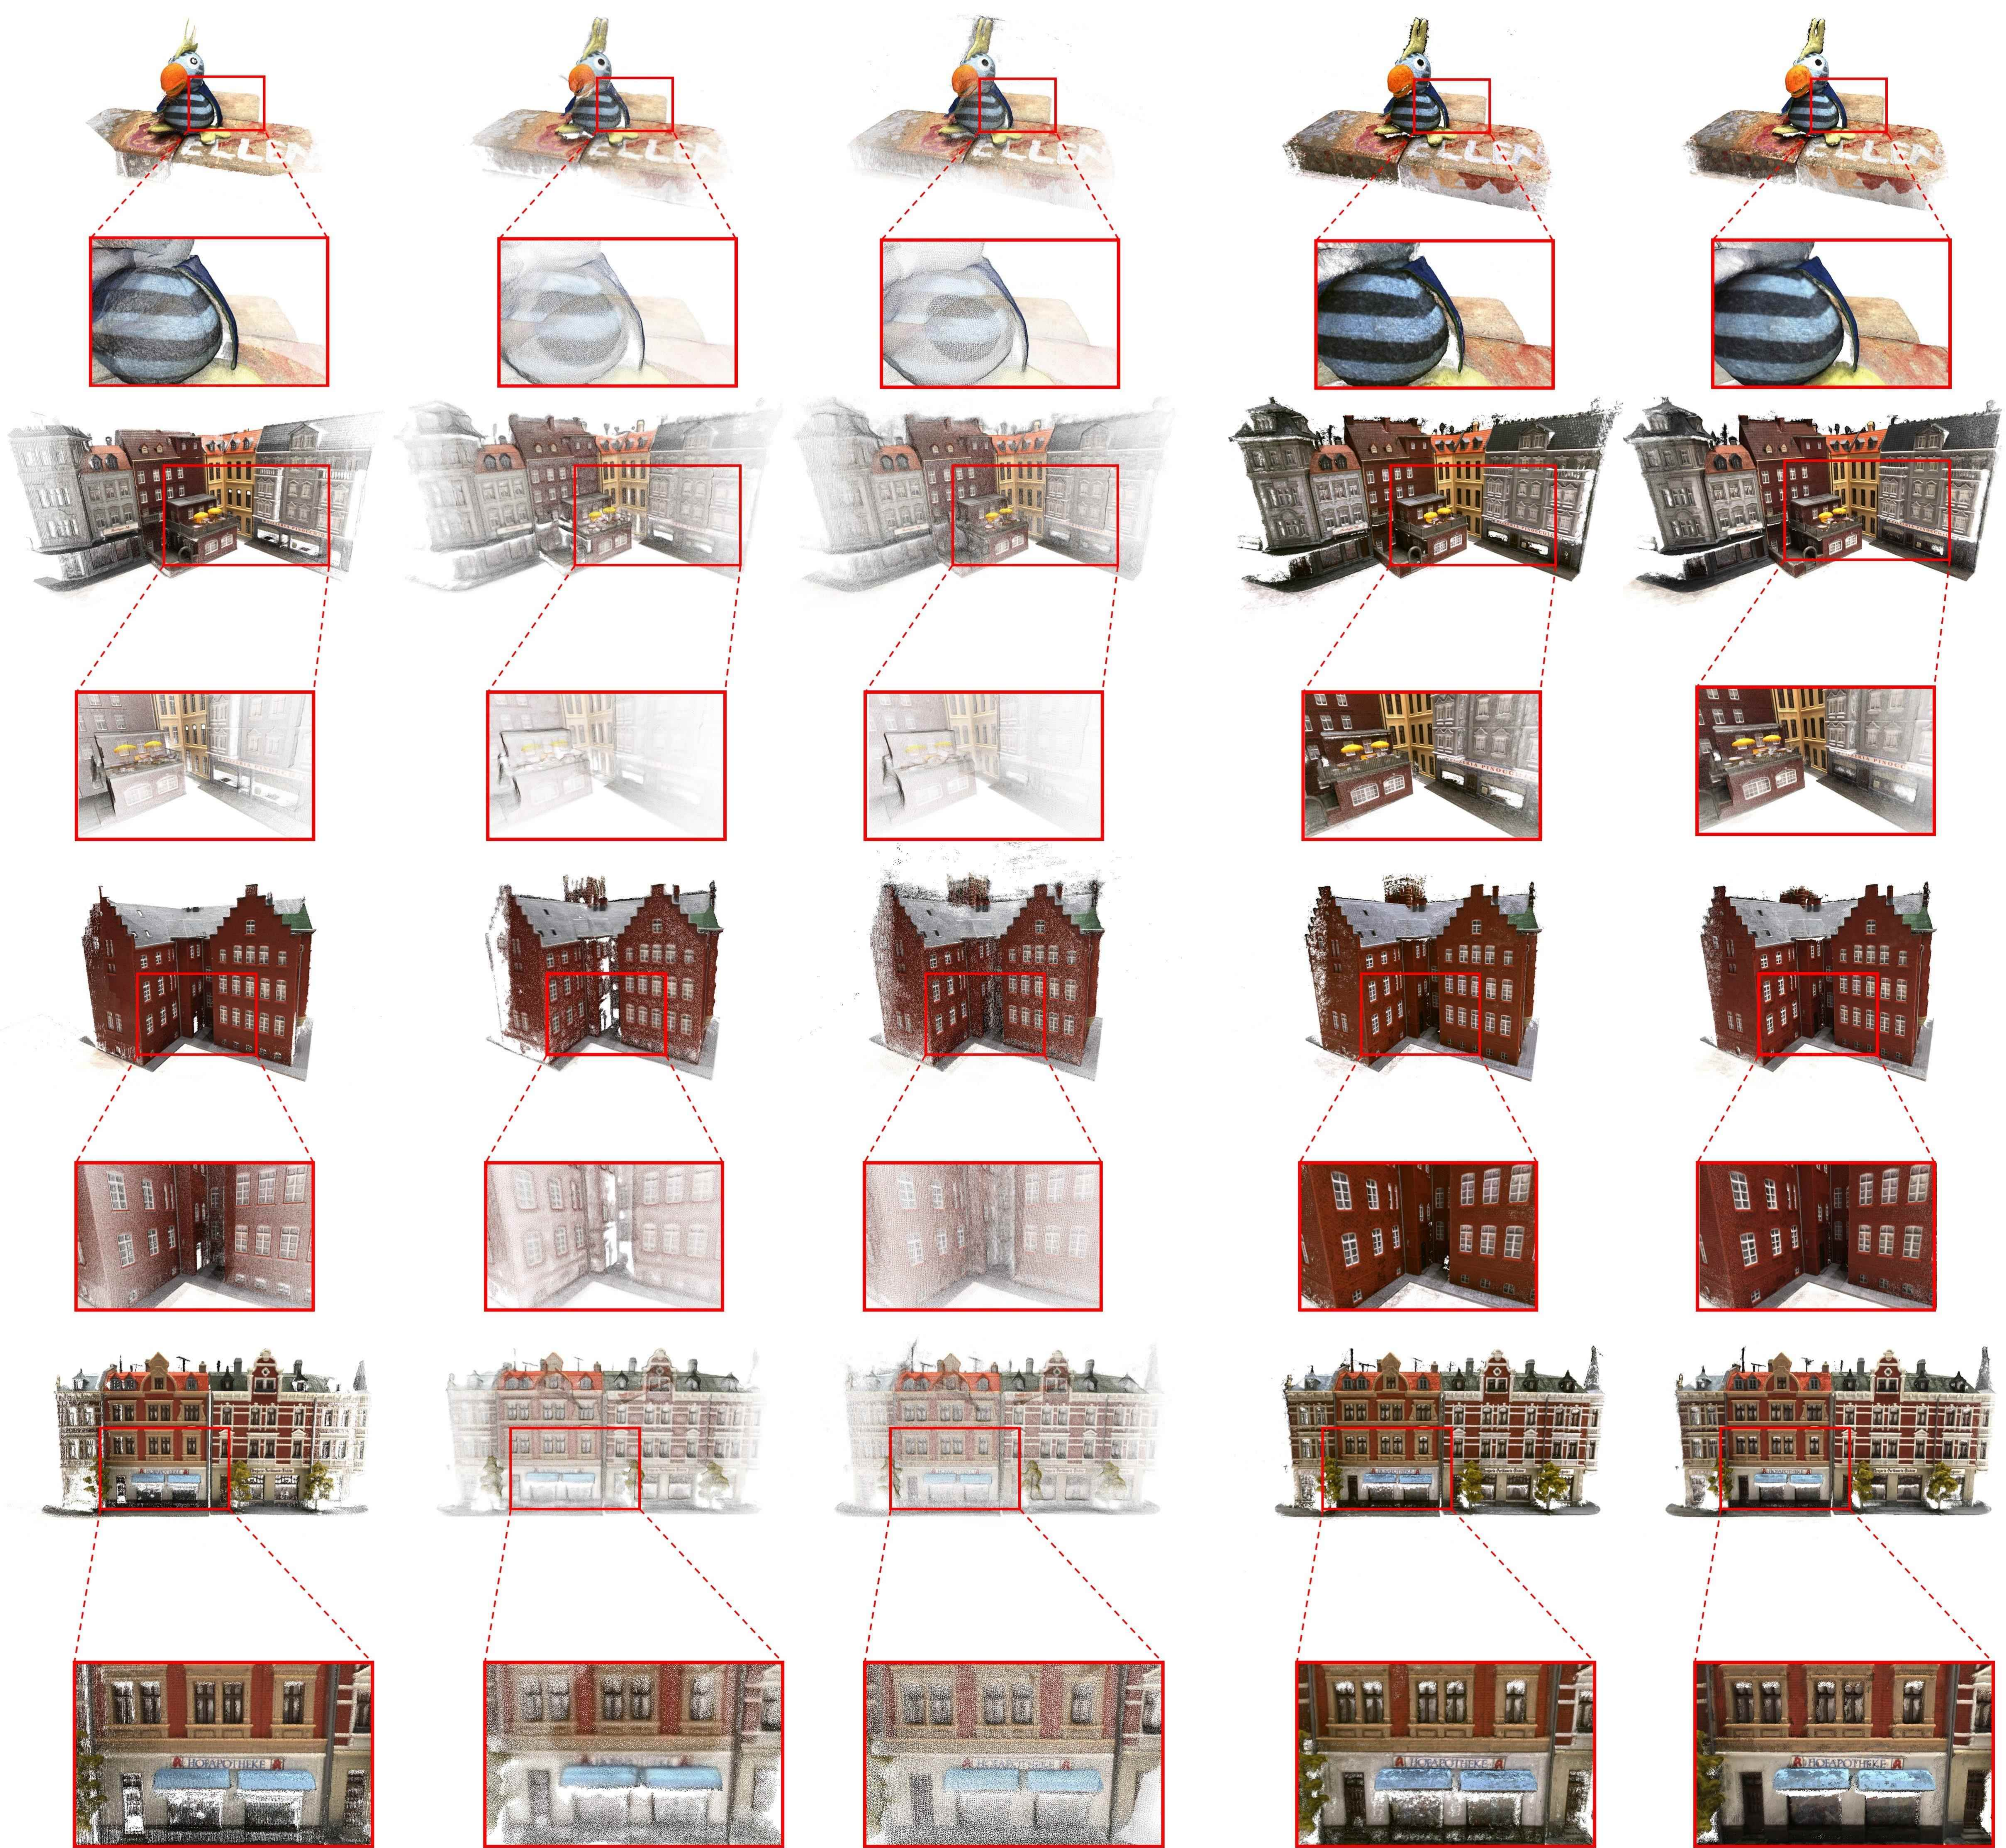

(a) Ground Truth

(b) Unsup\_MVS

(c) JDACS

(d) Ours

(e) CasMVSNet

Supplement: Supplementary file 3 [file 136910649-supp.zip]

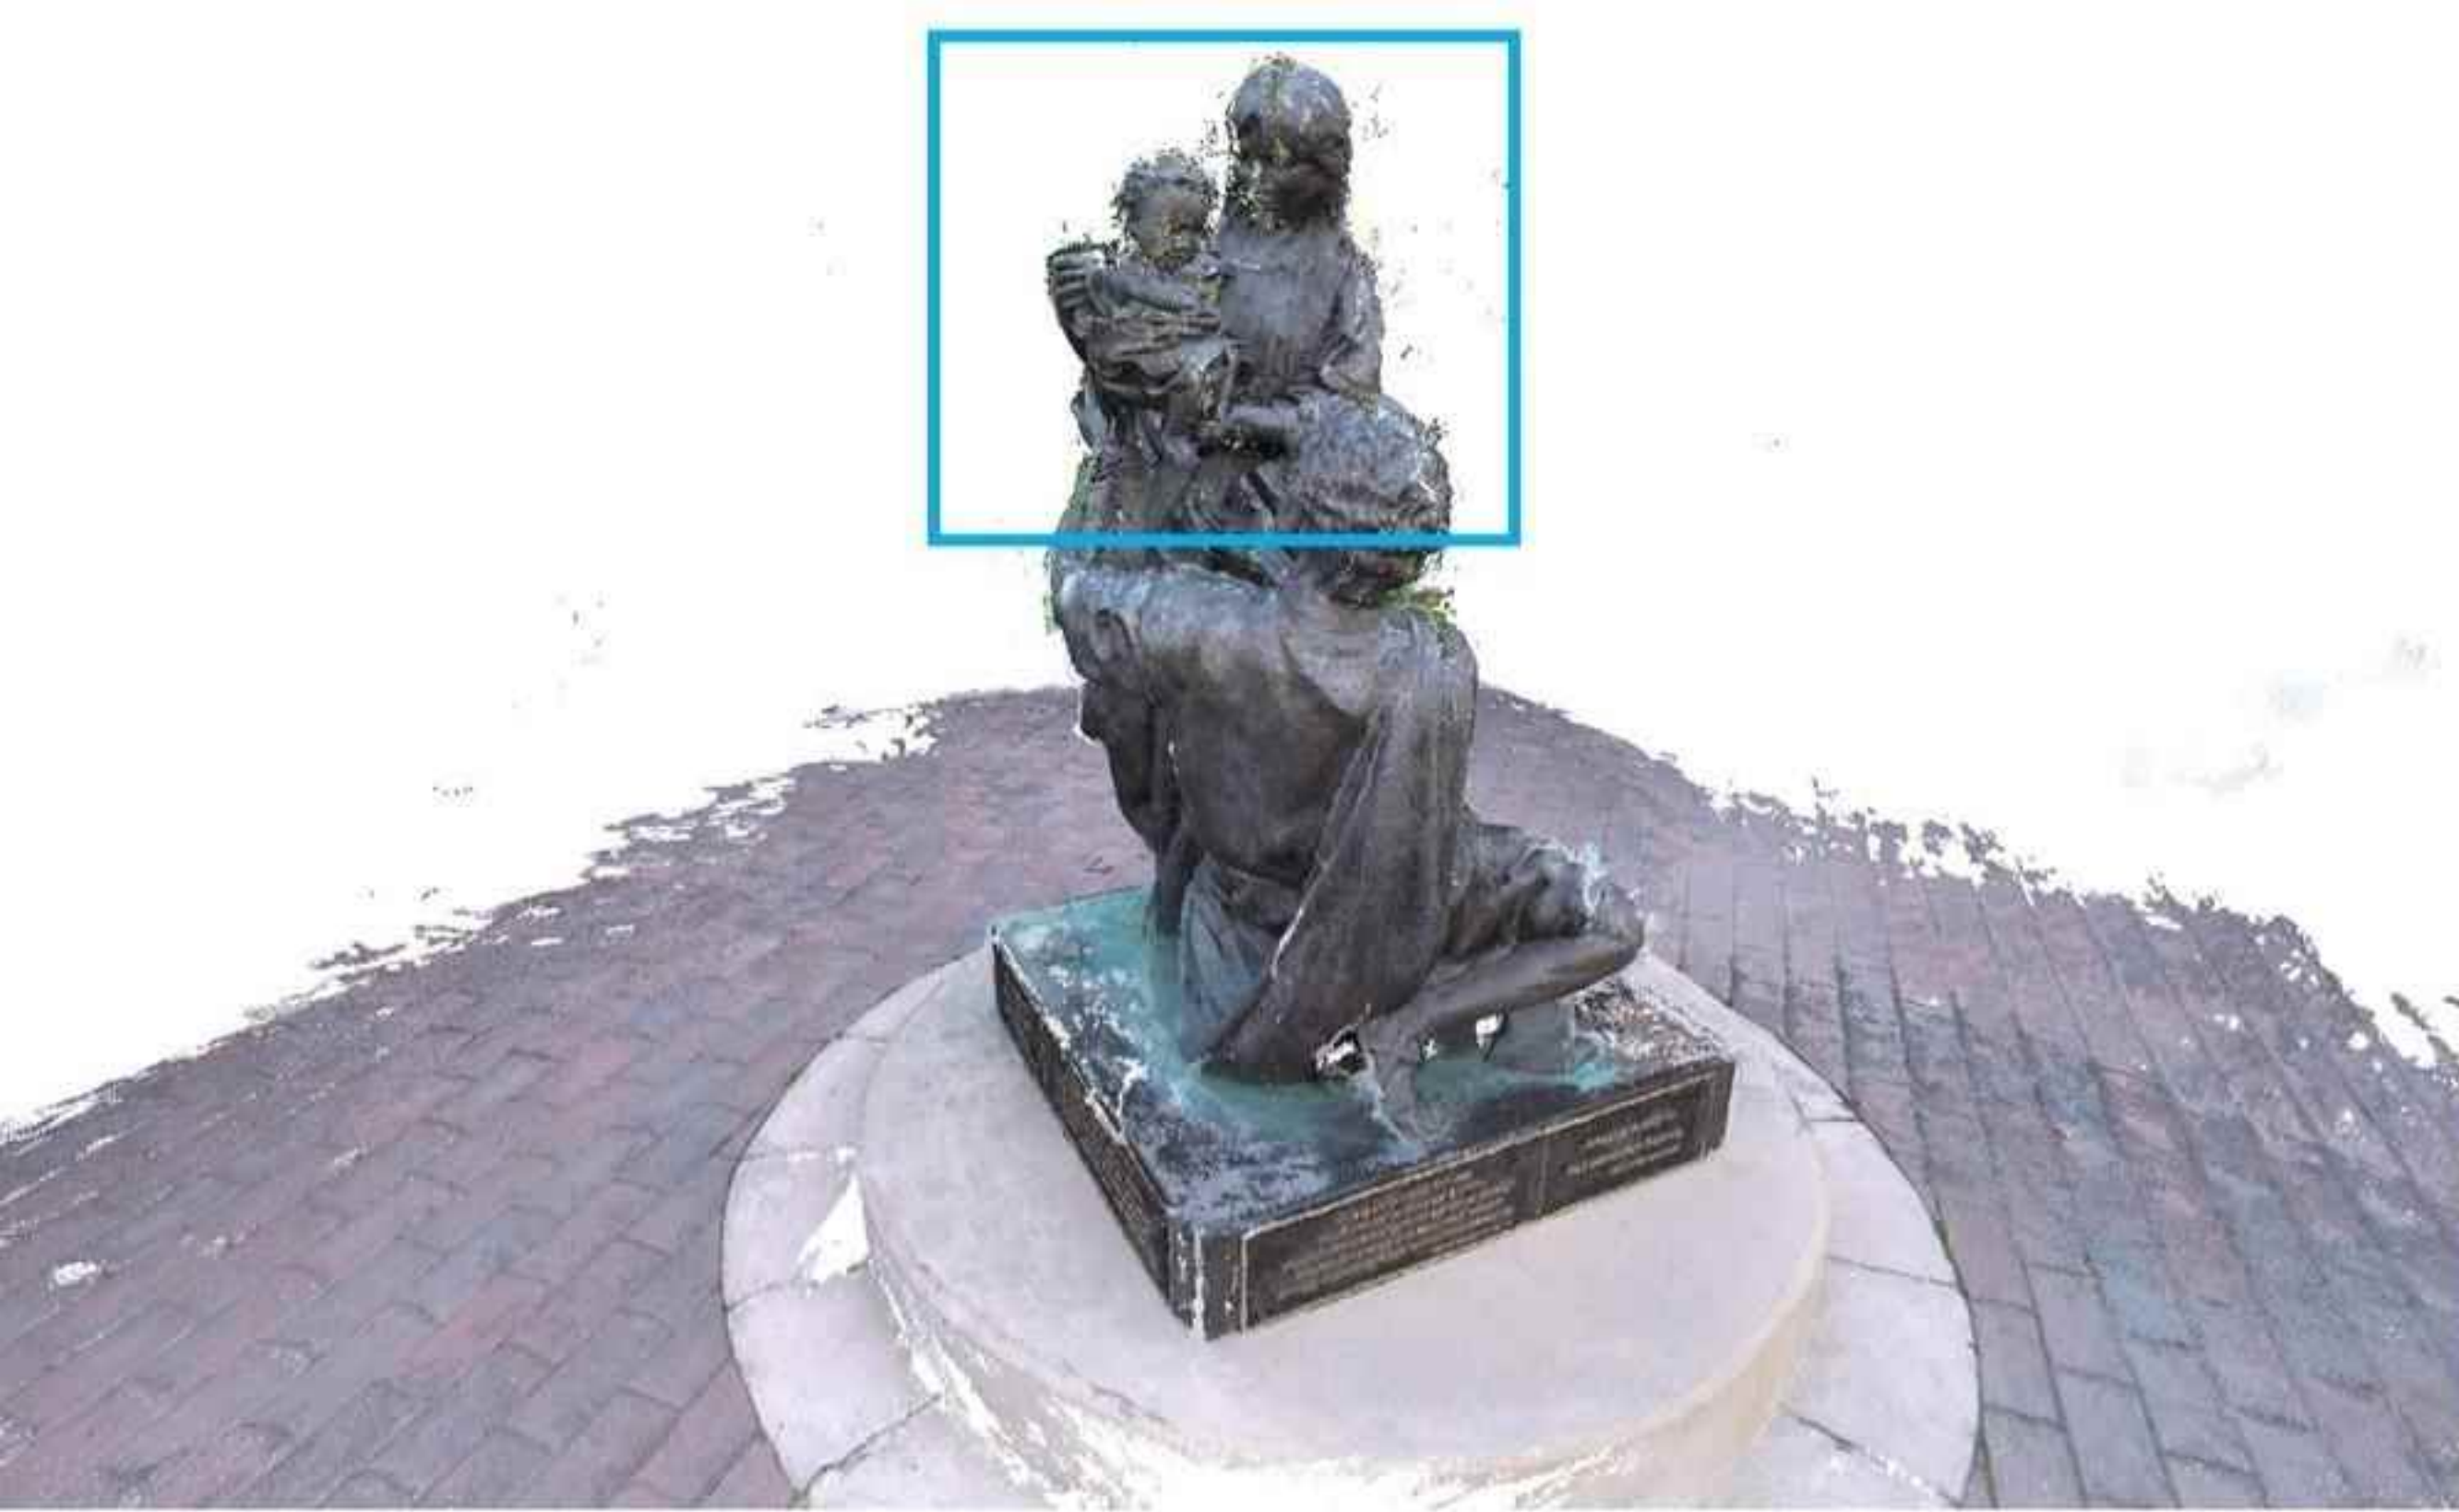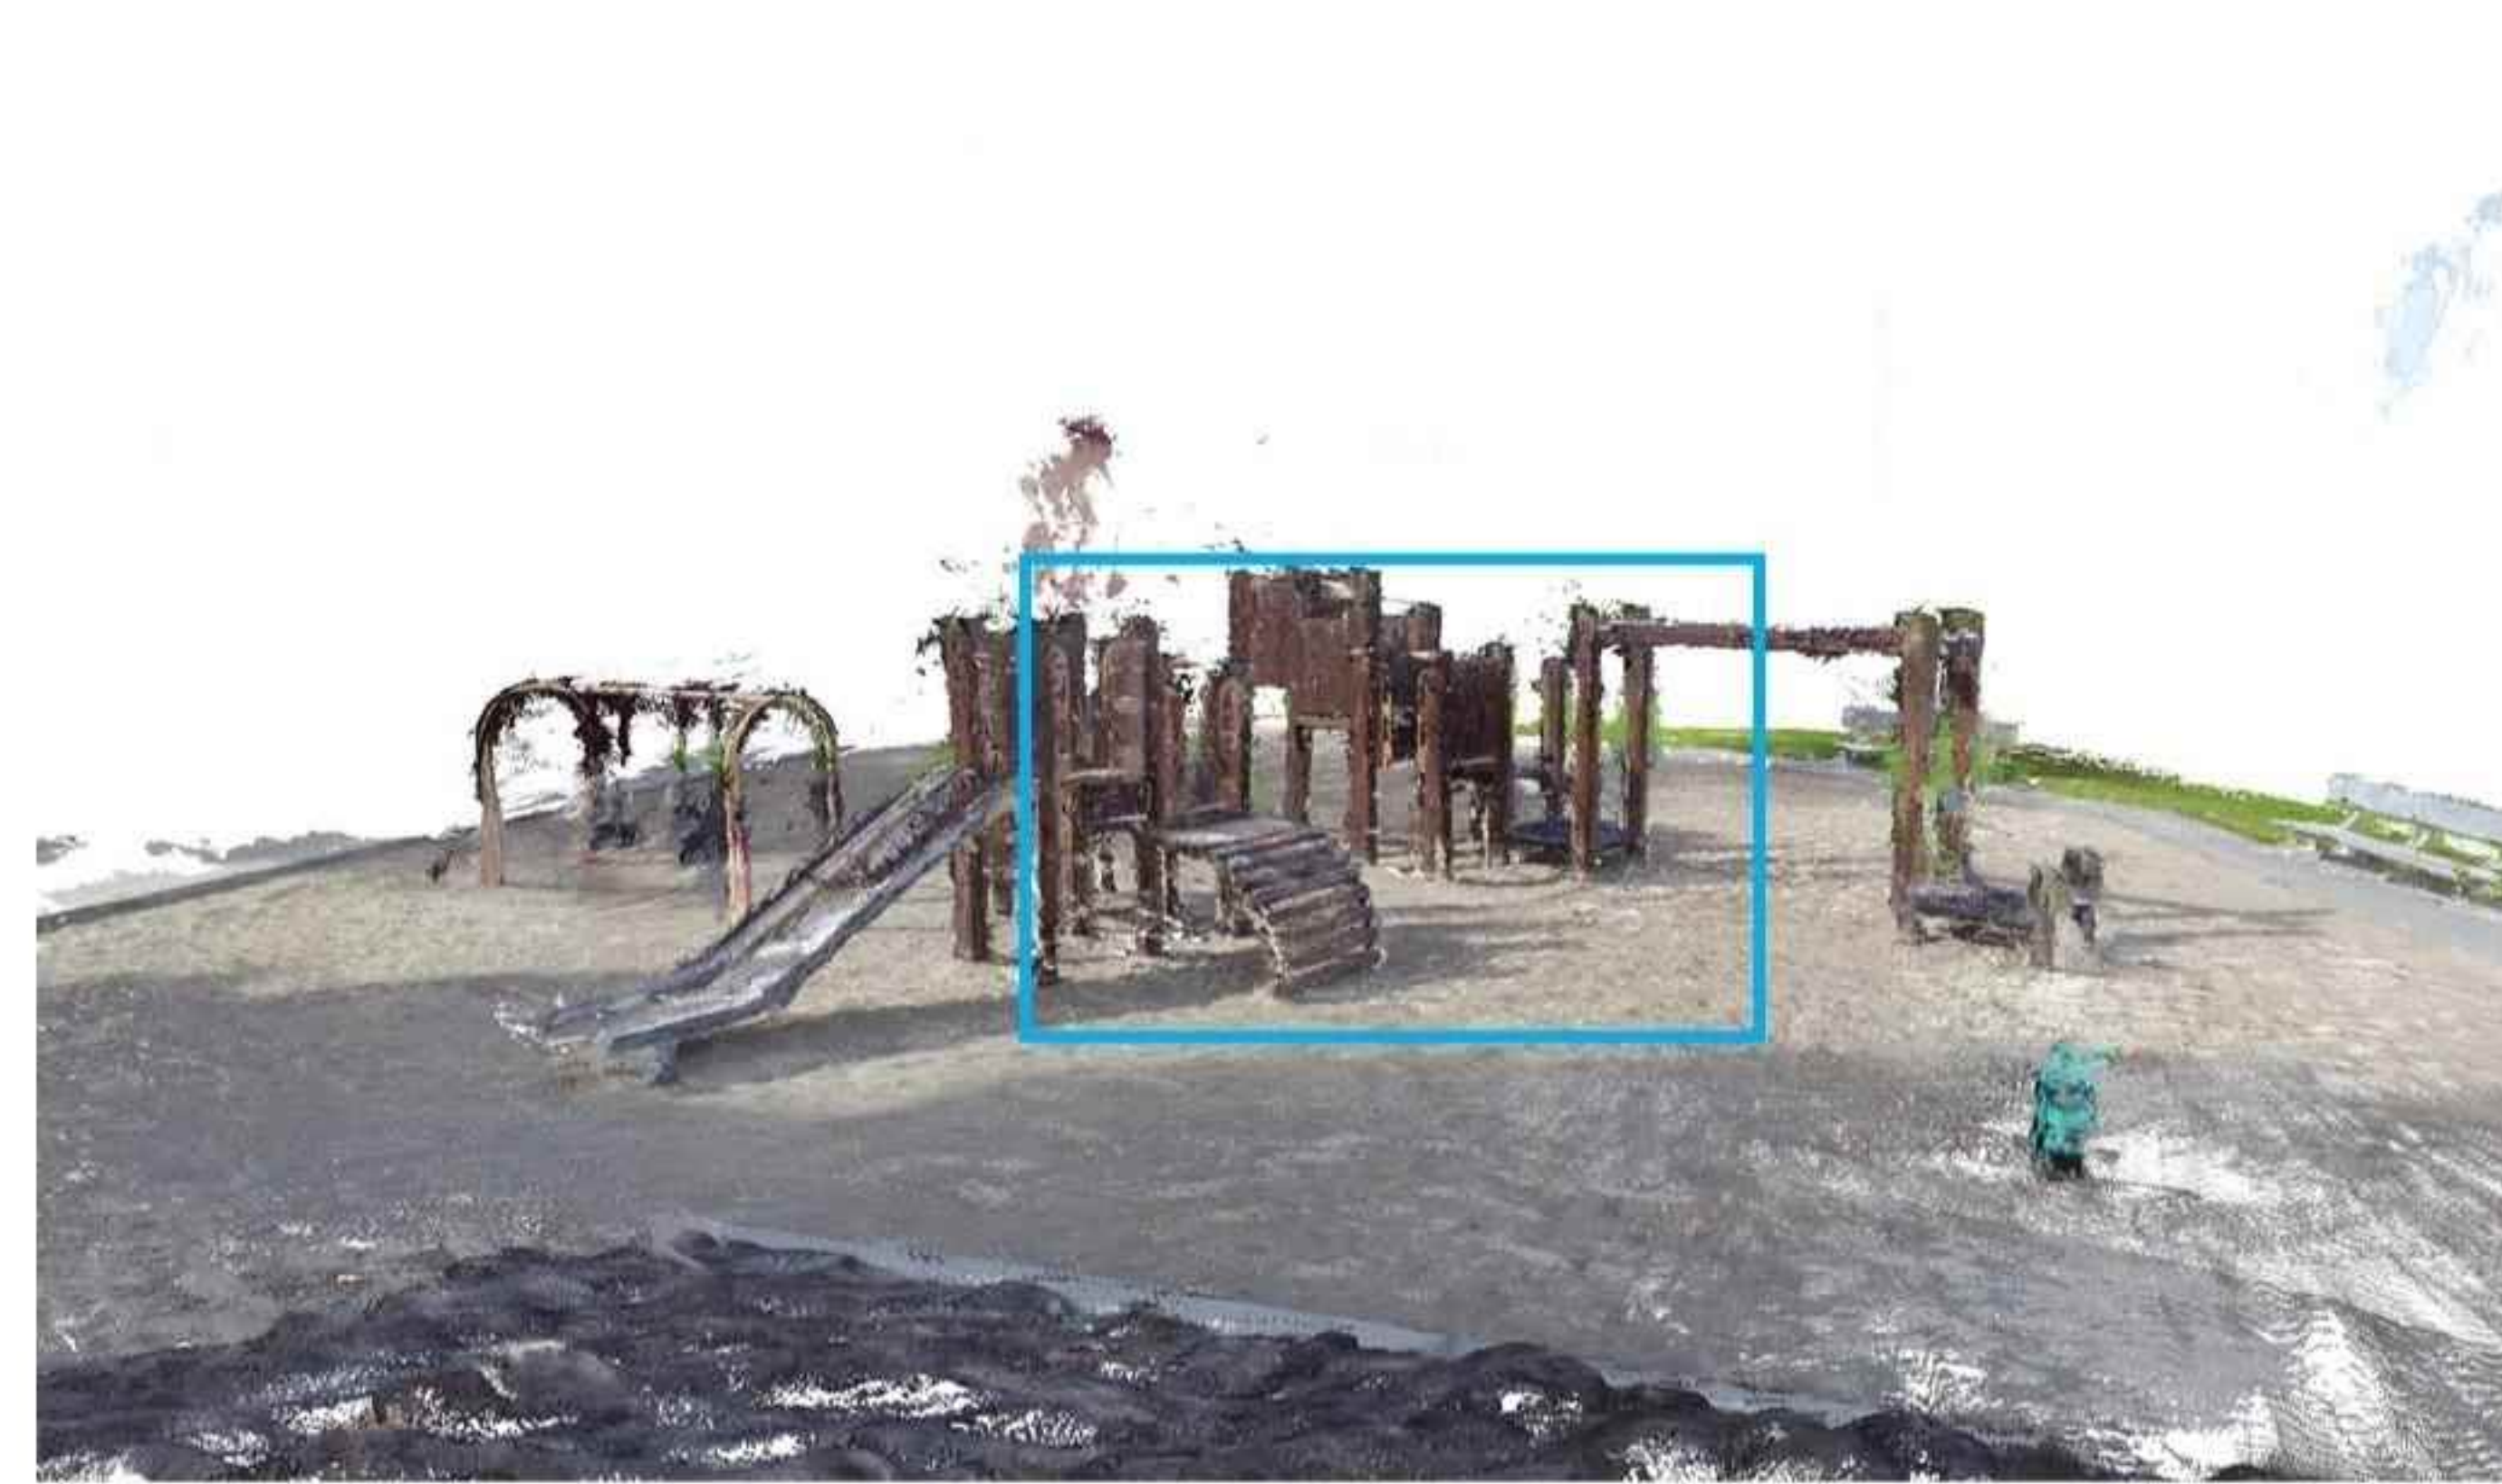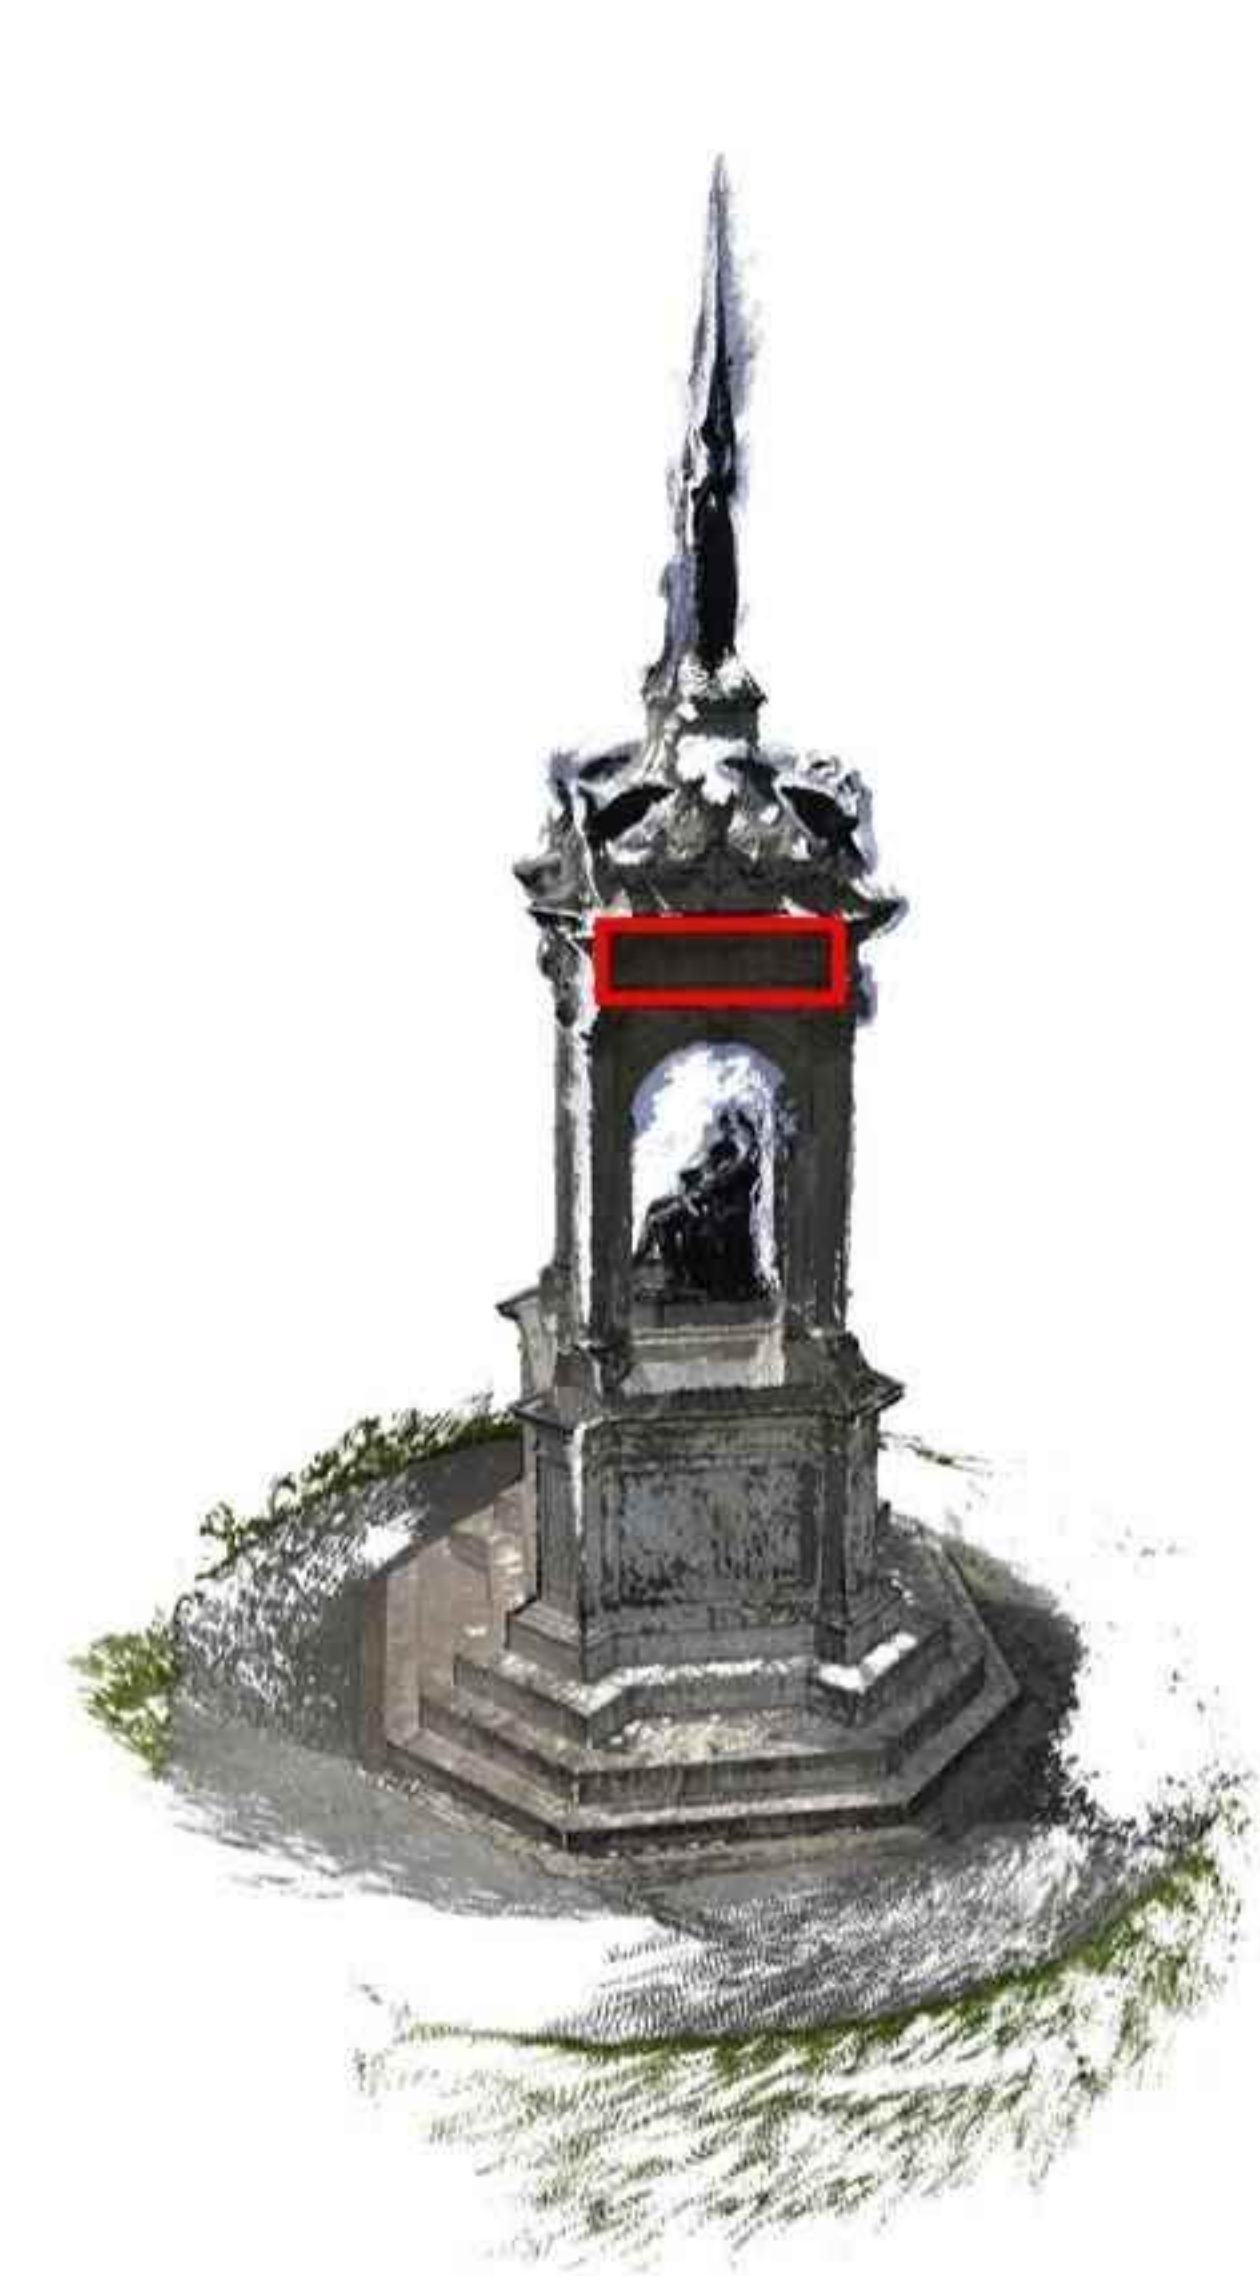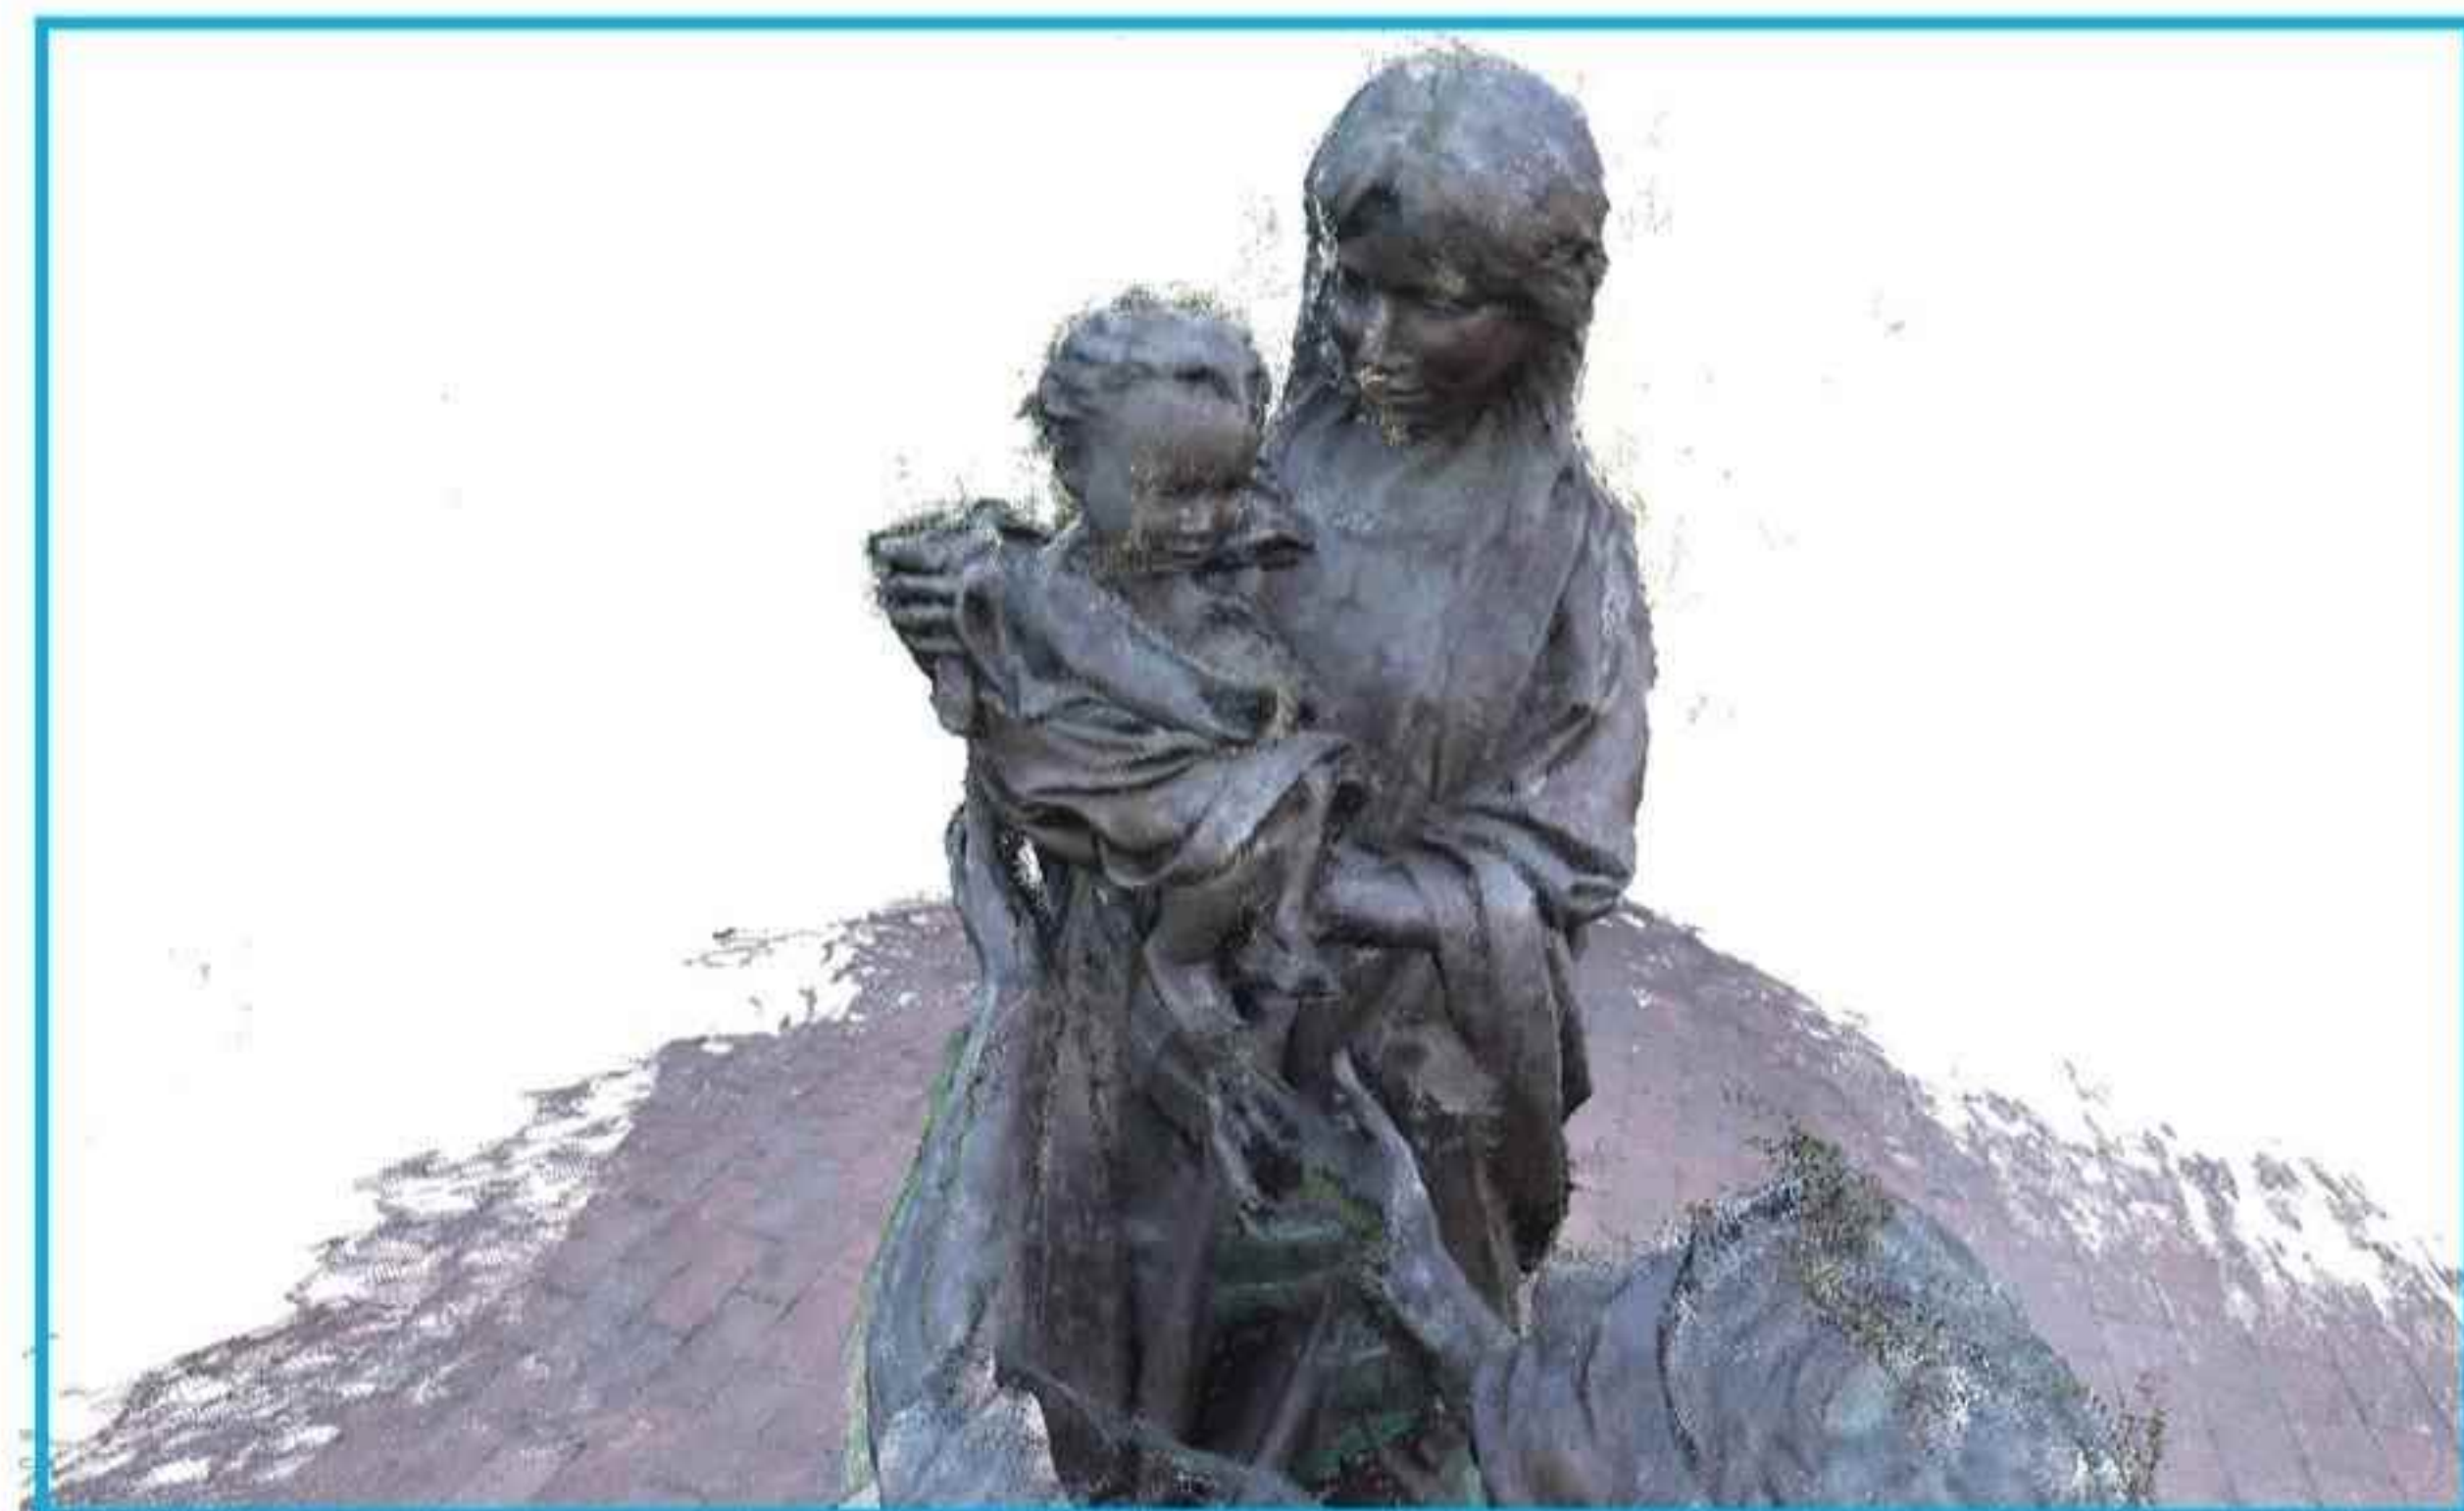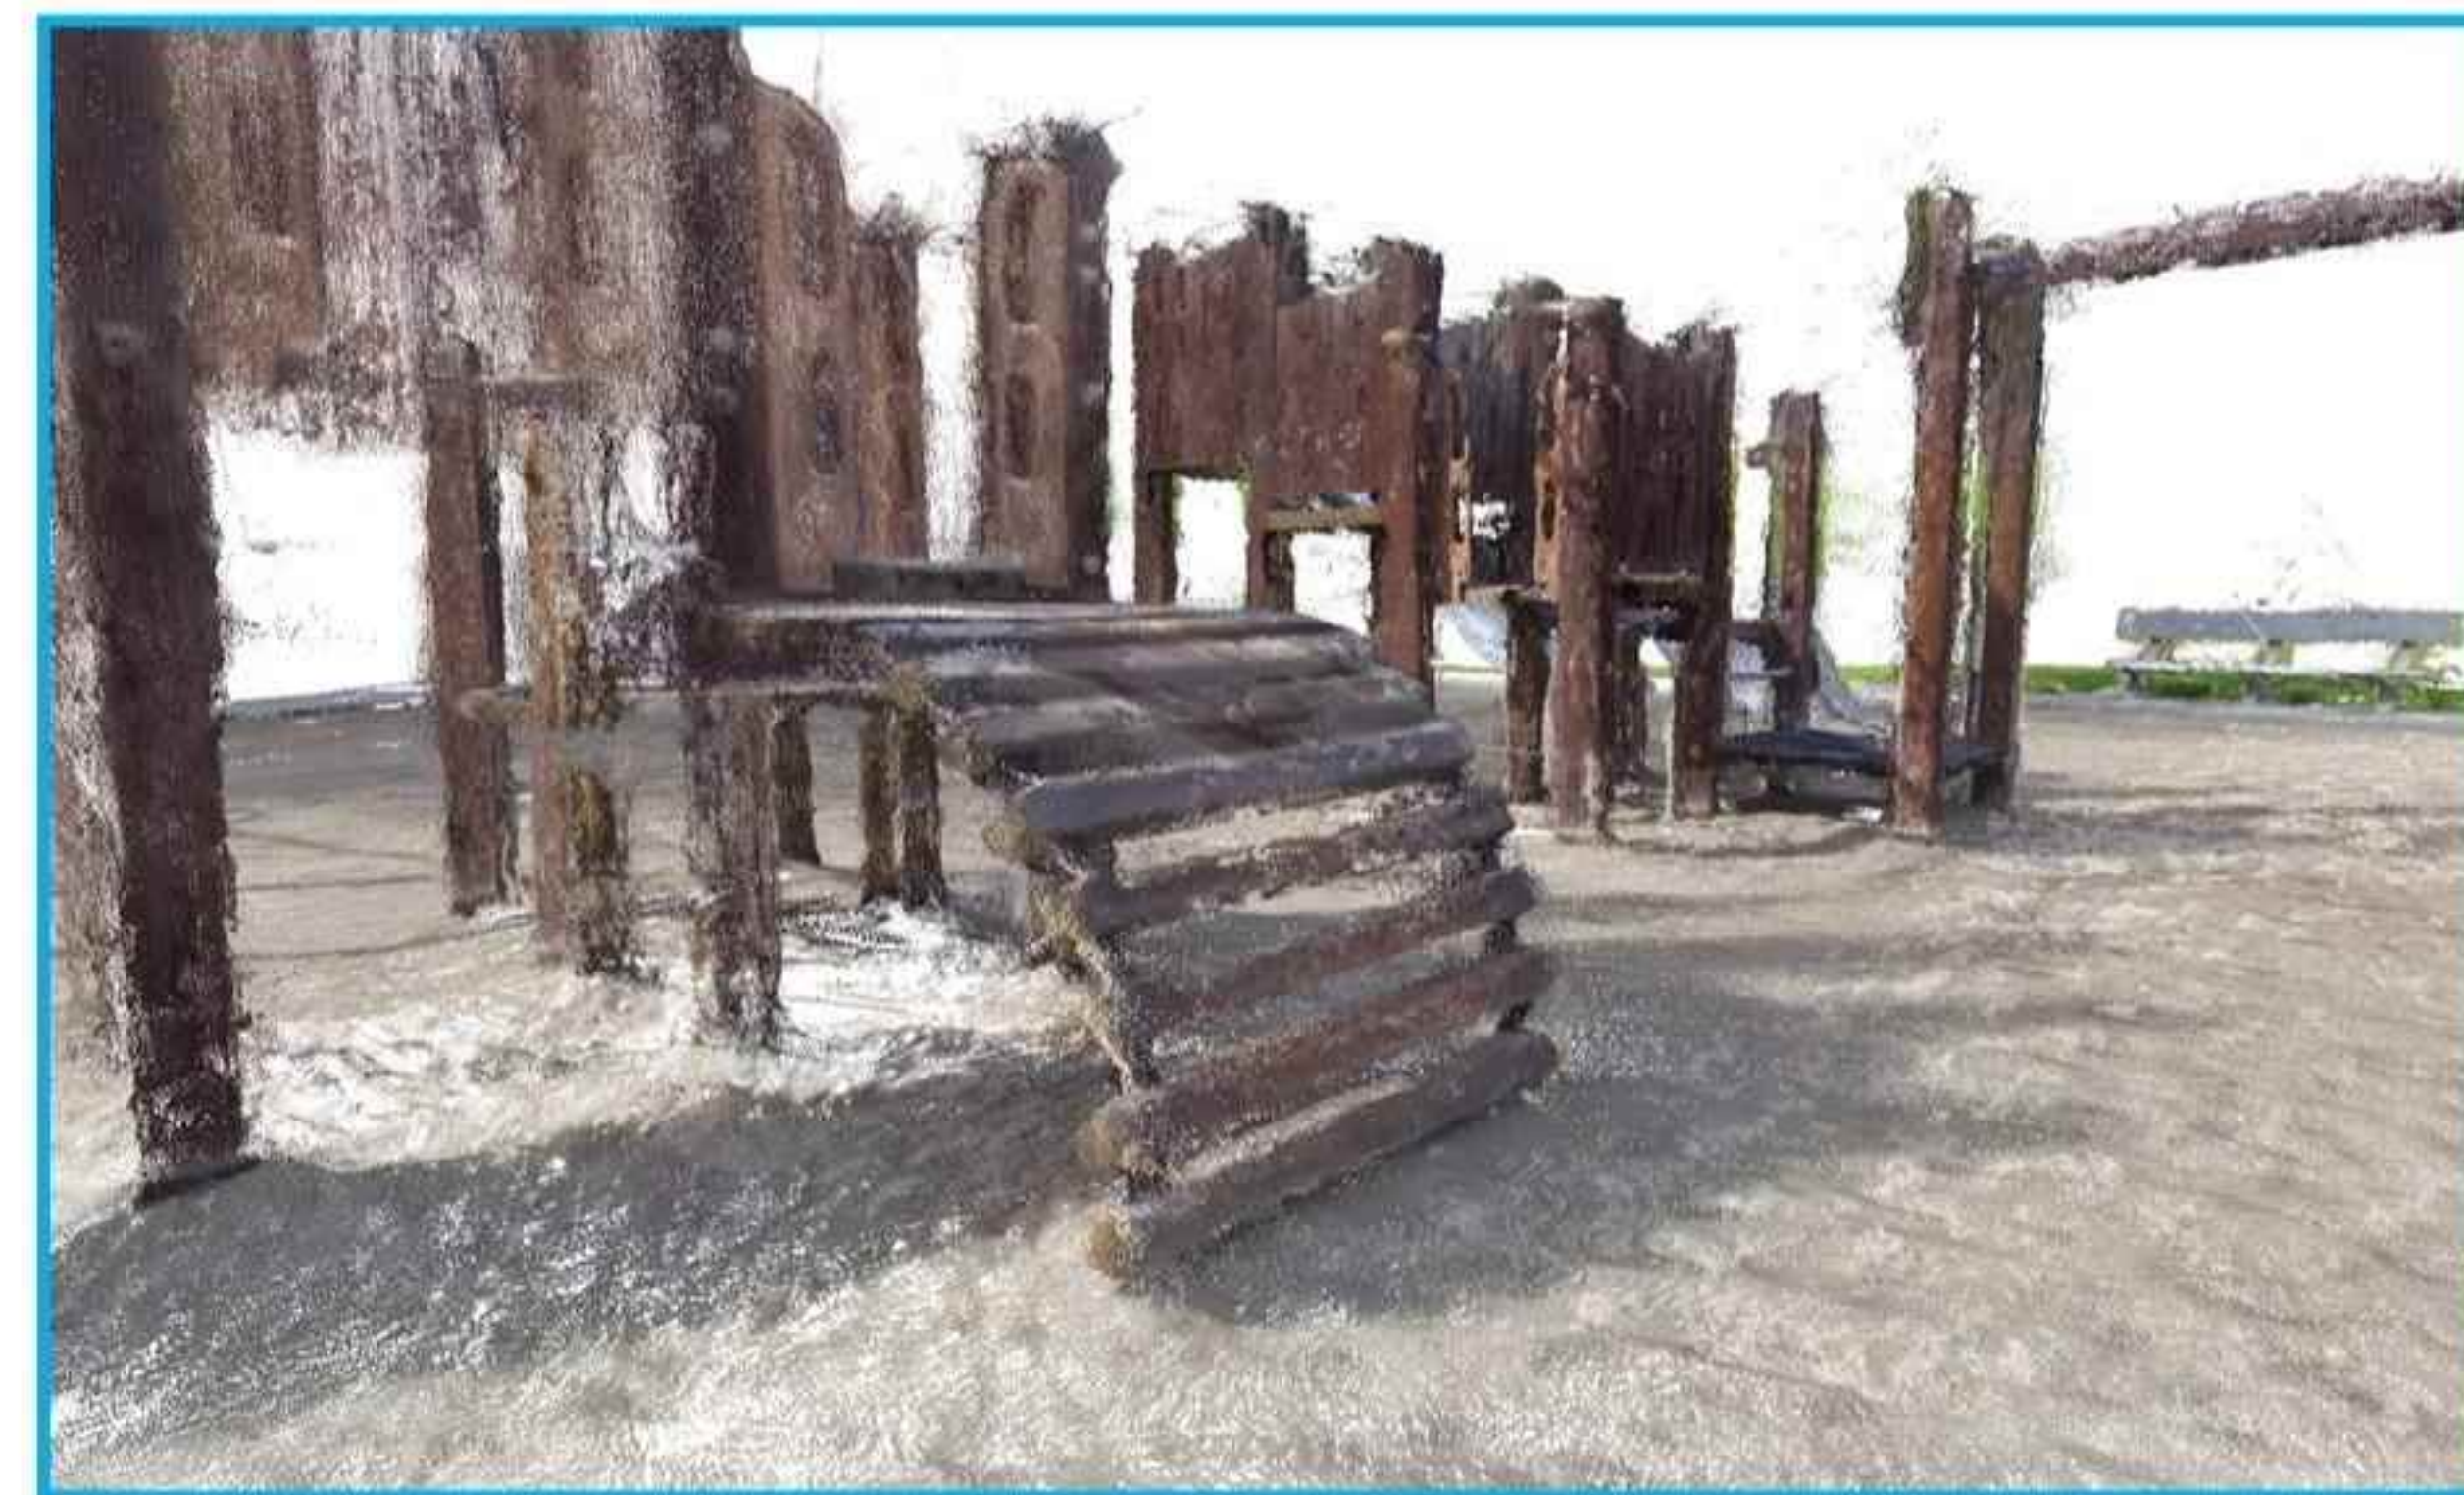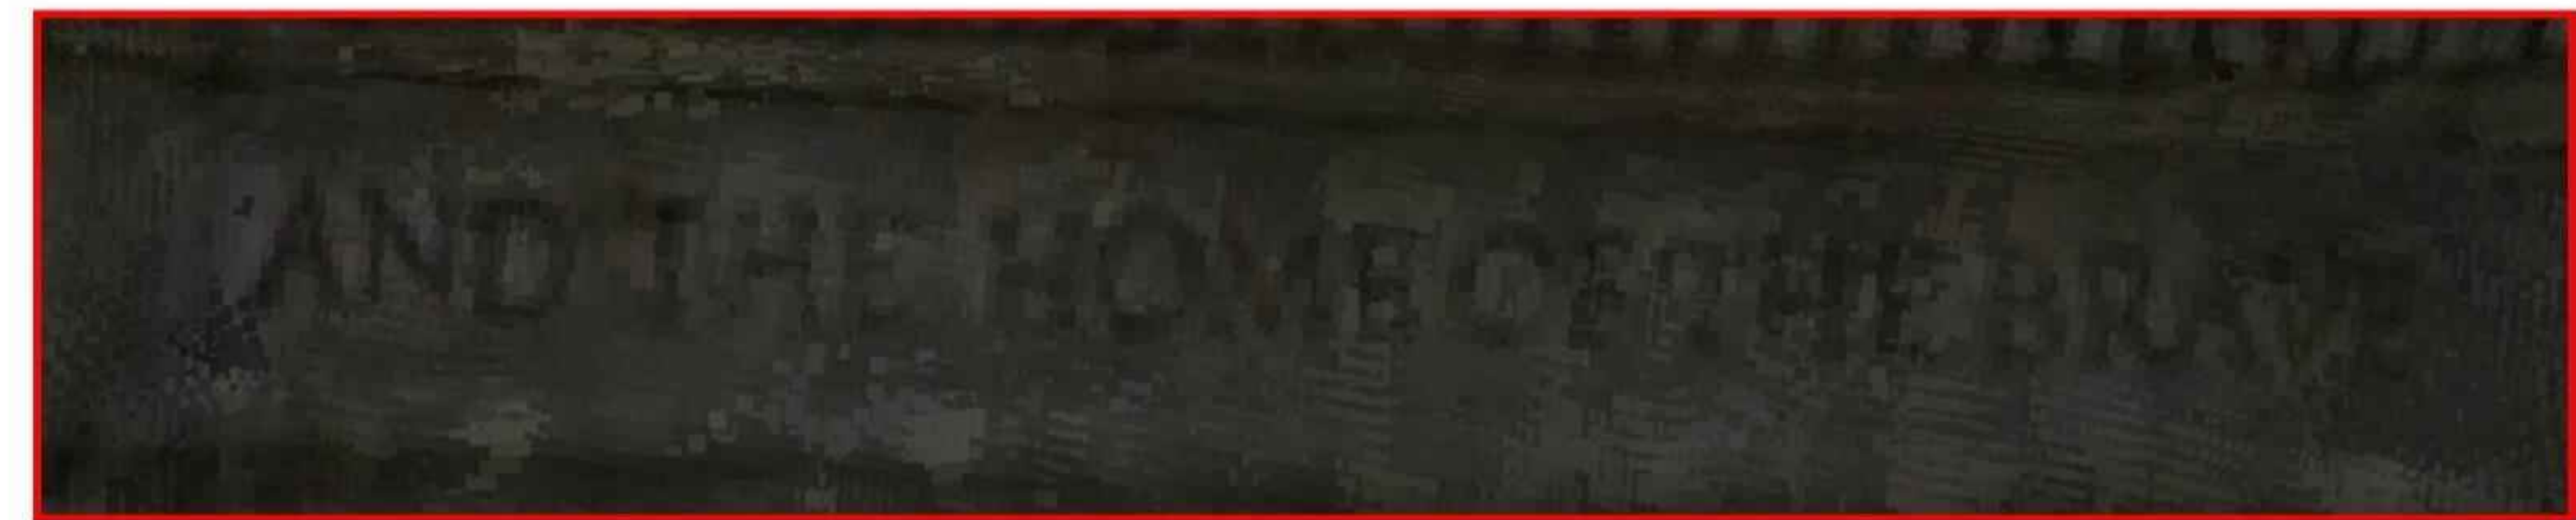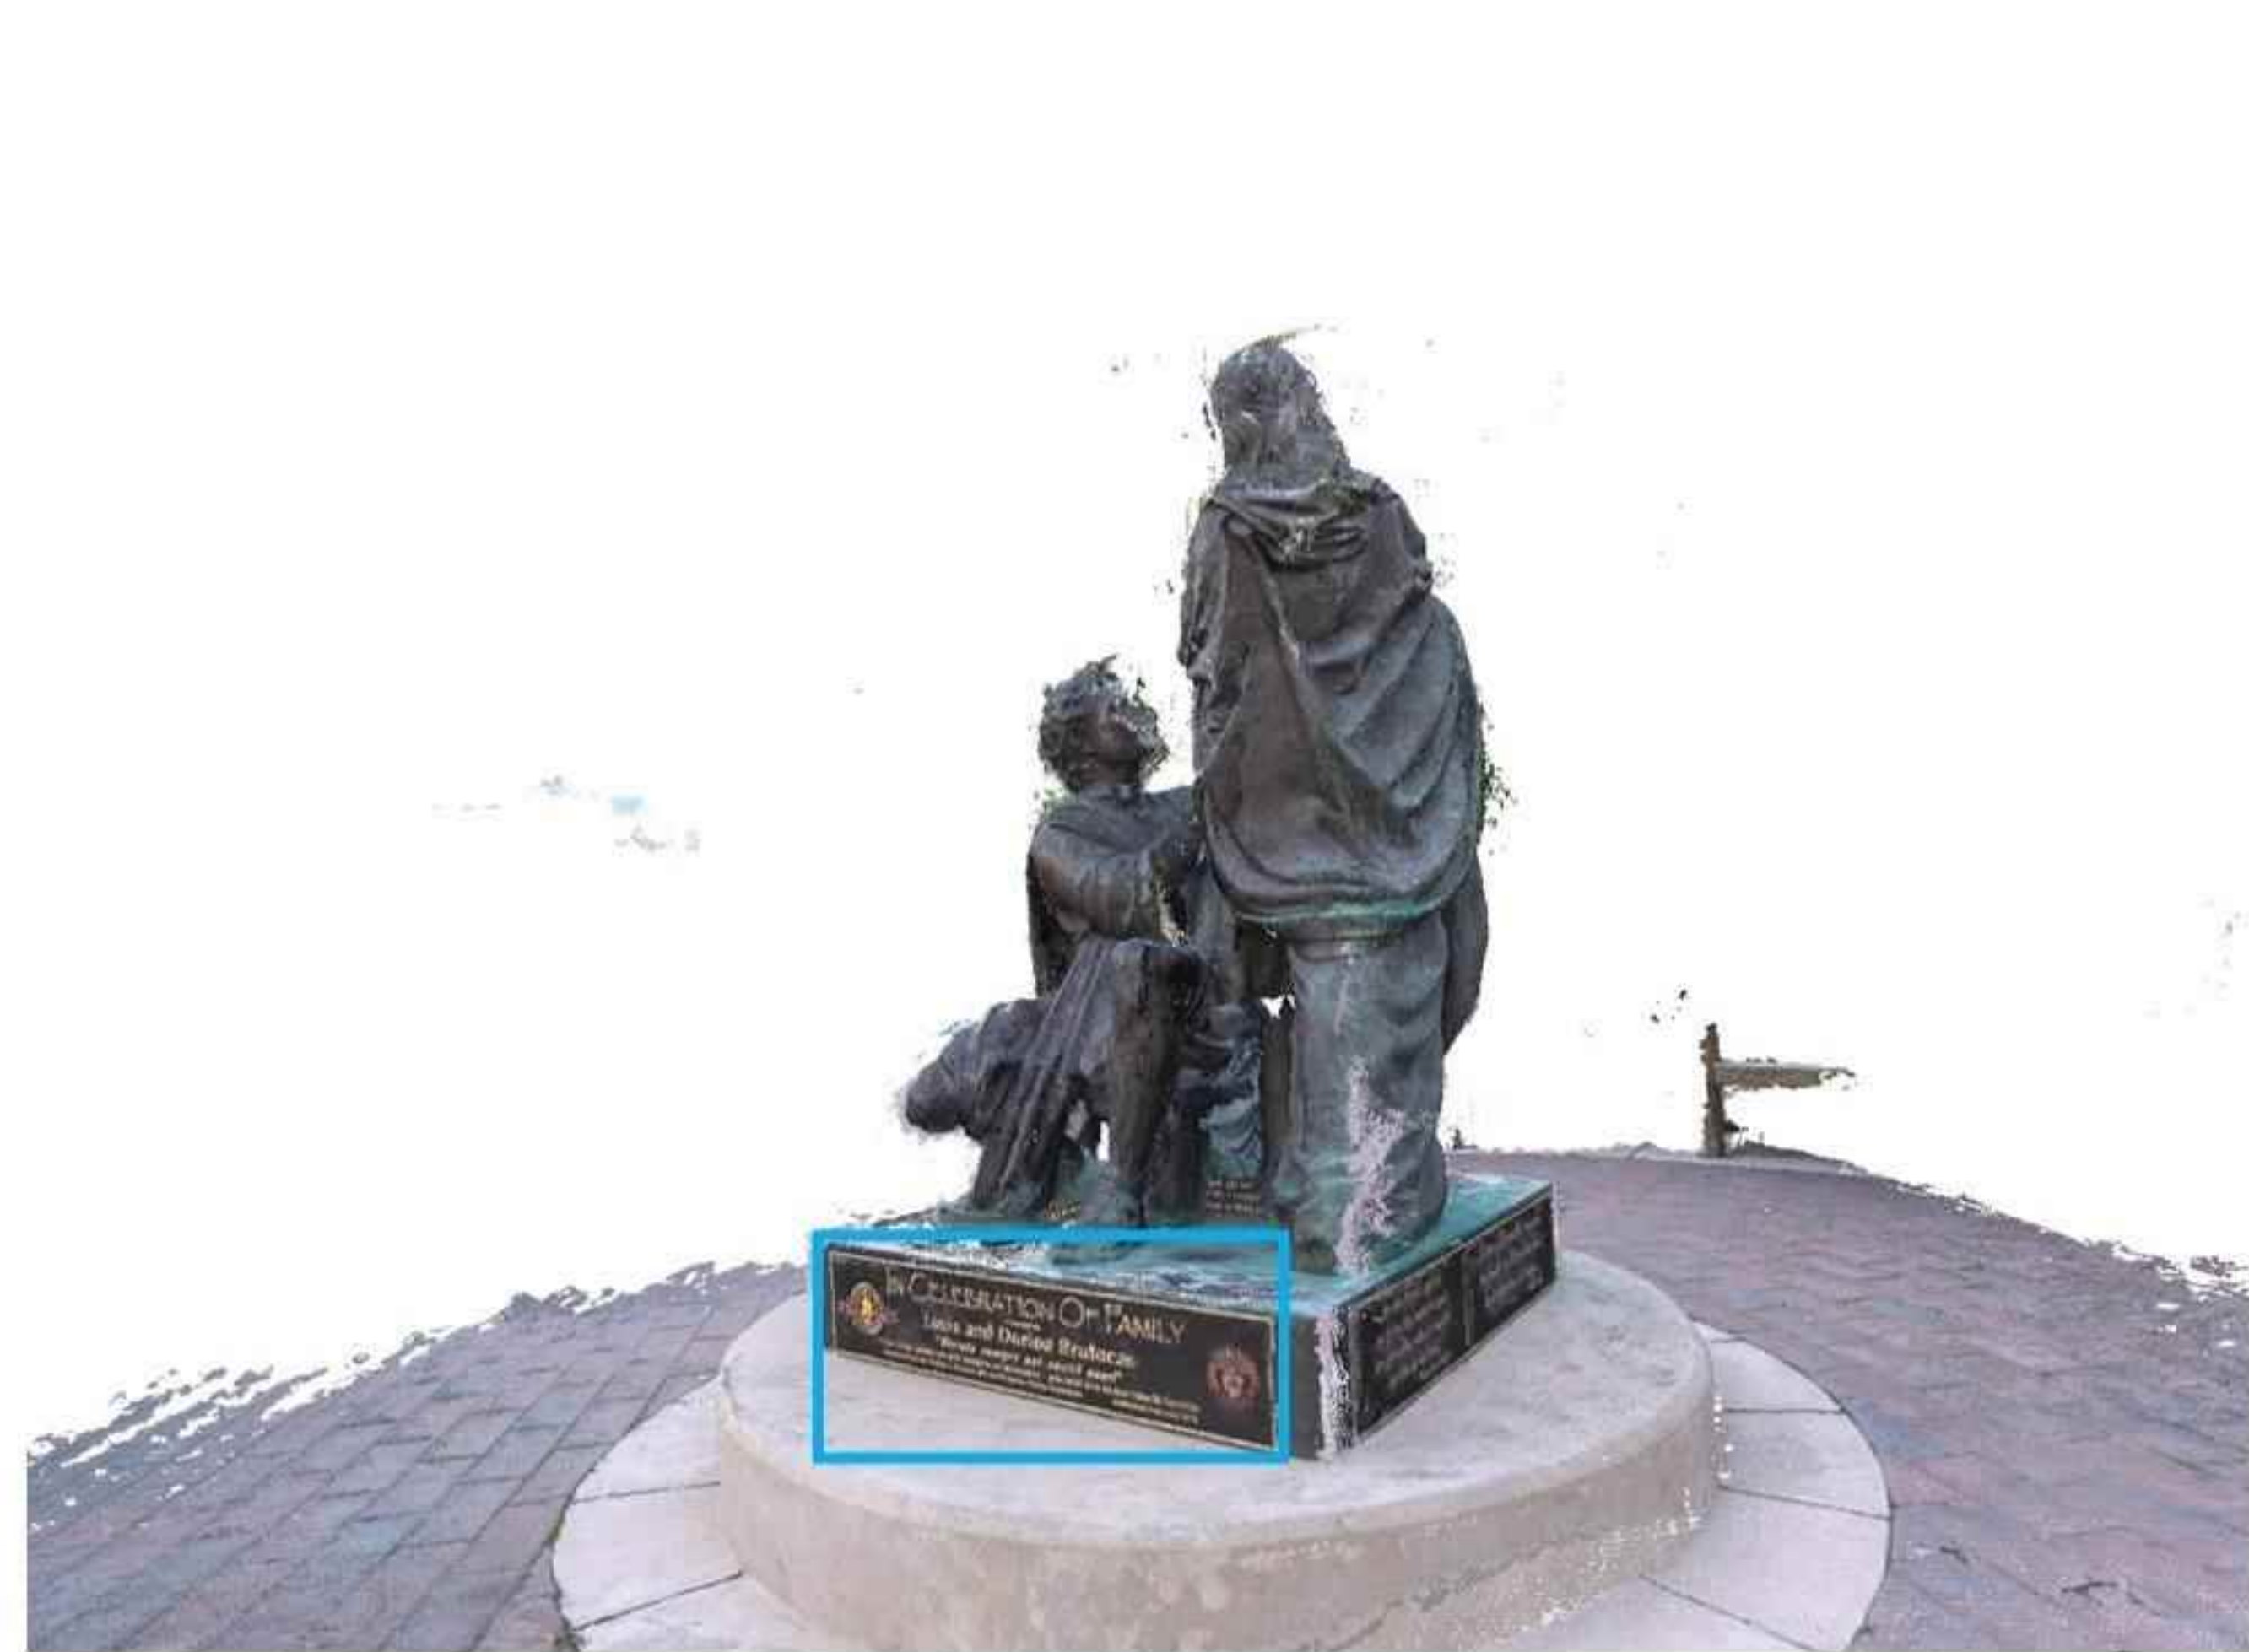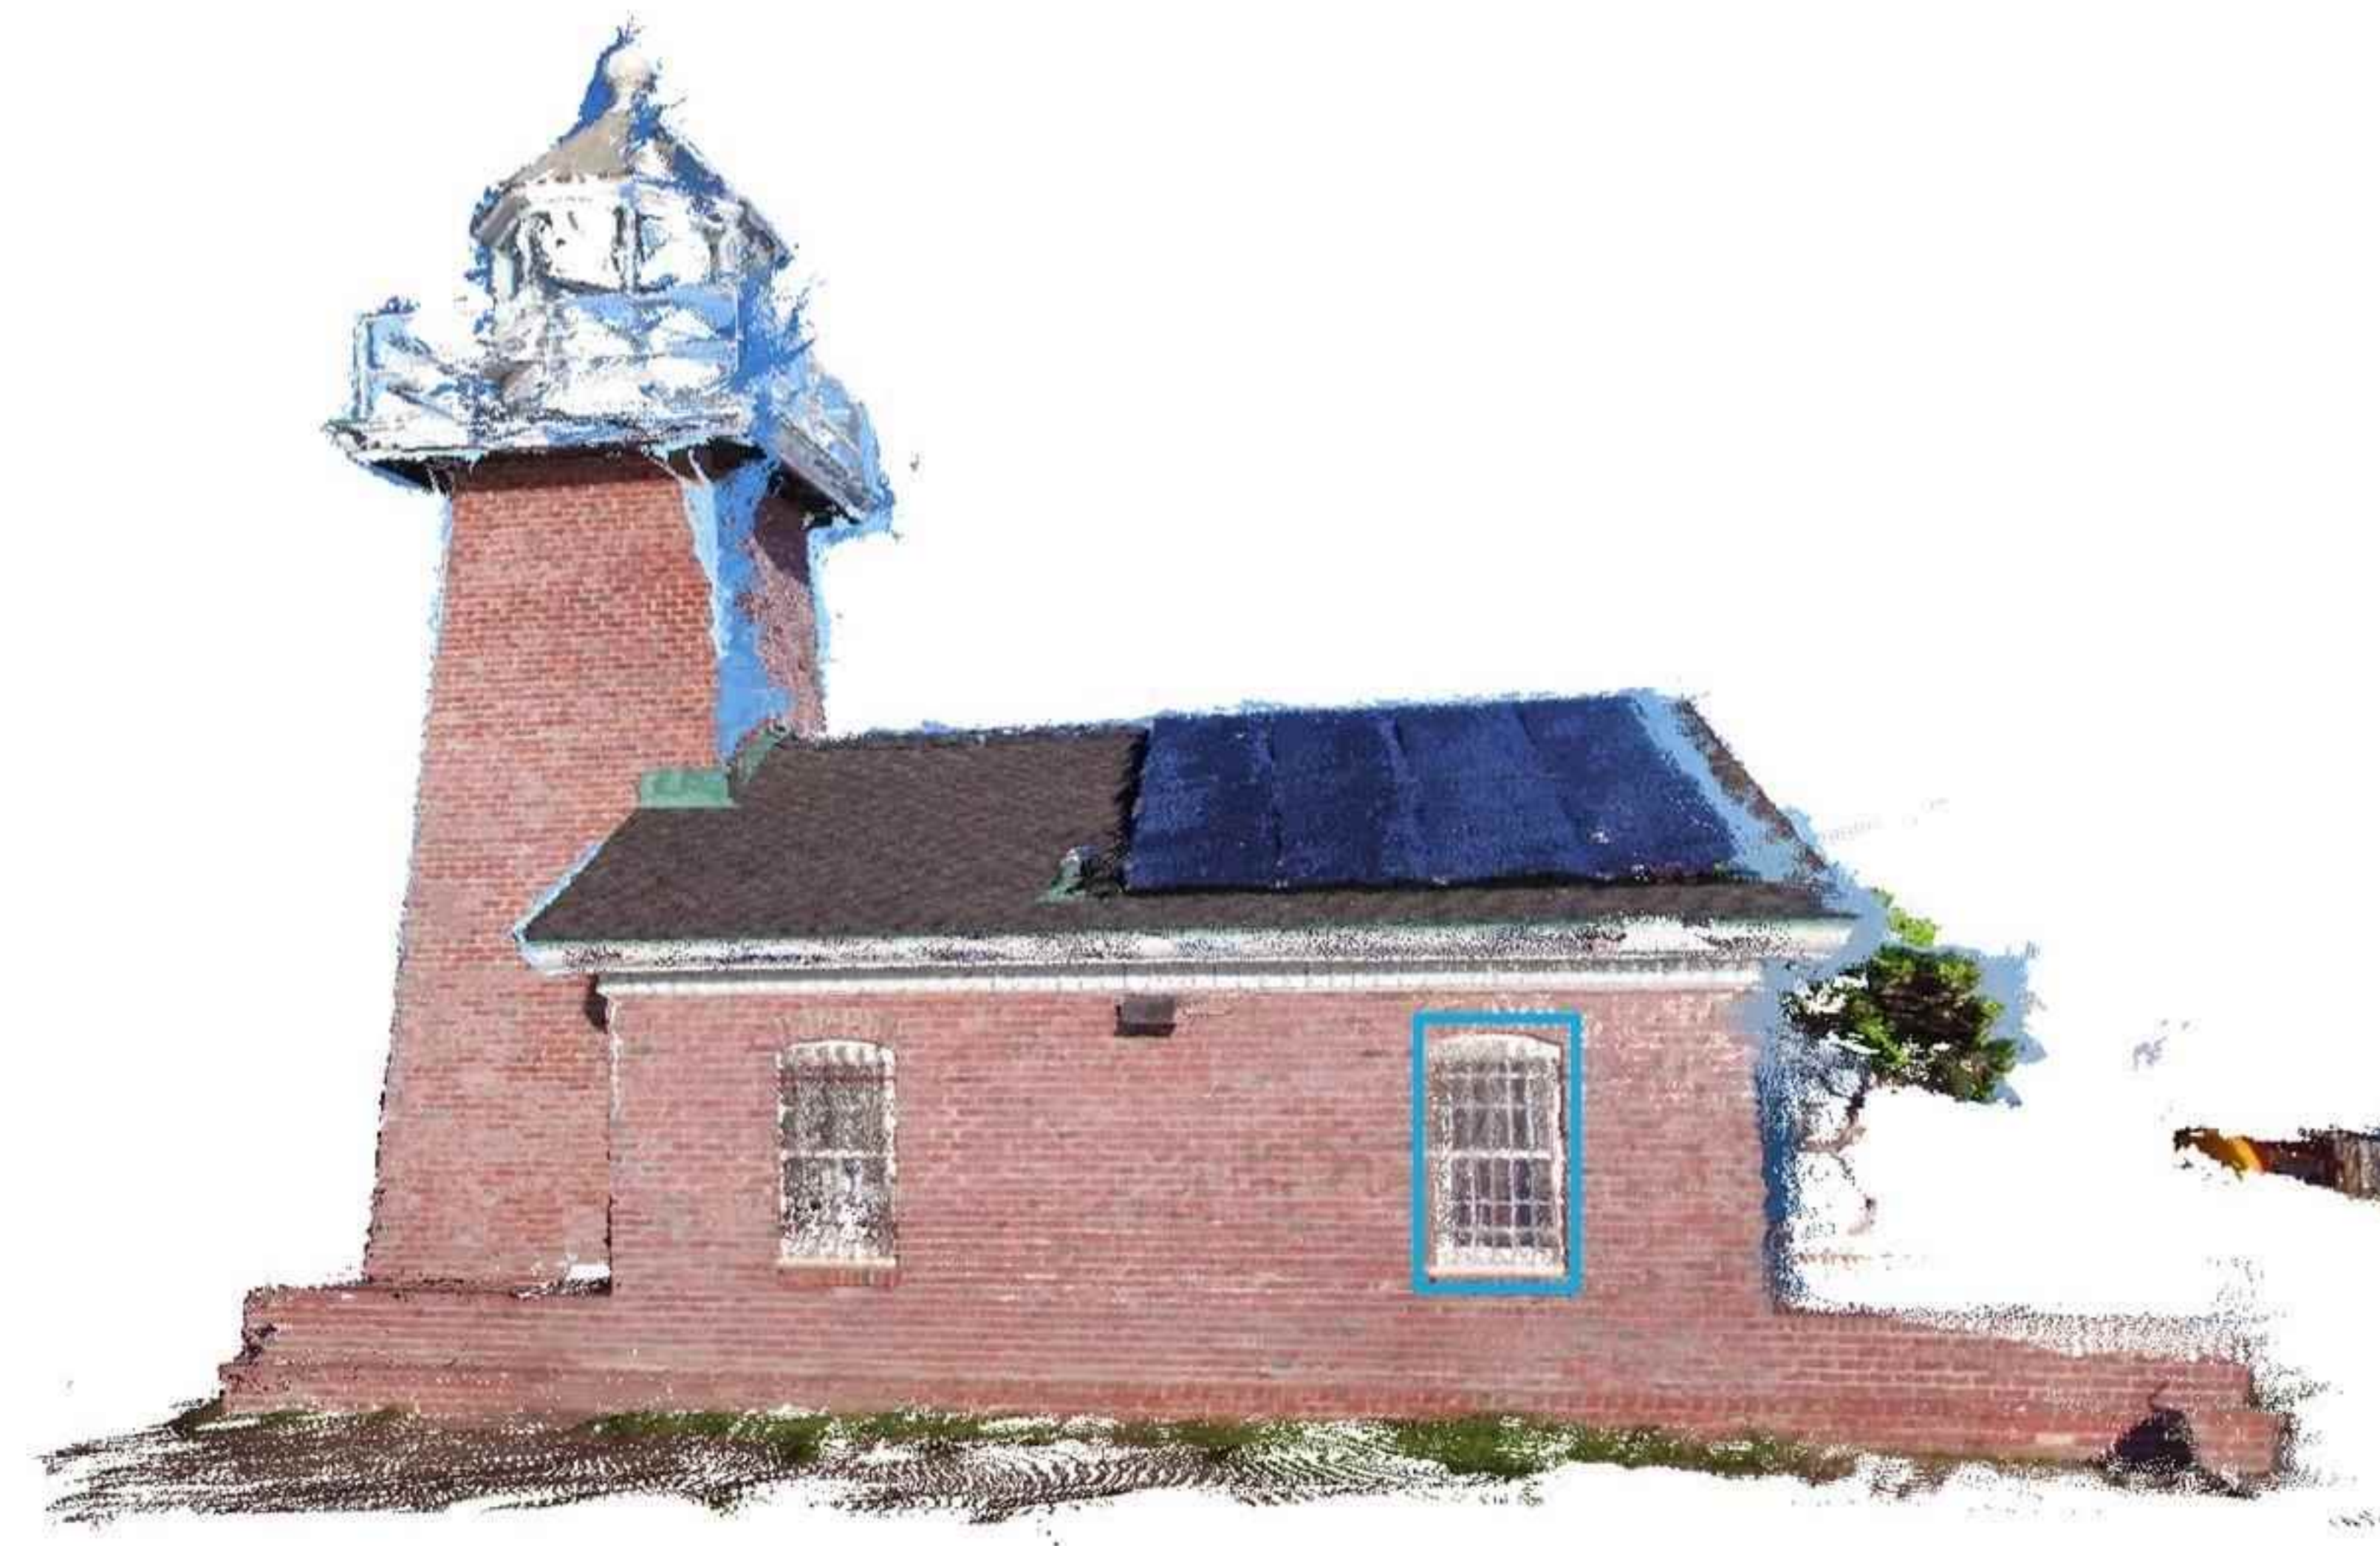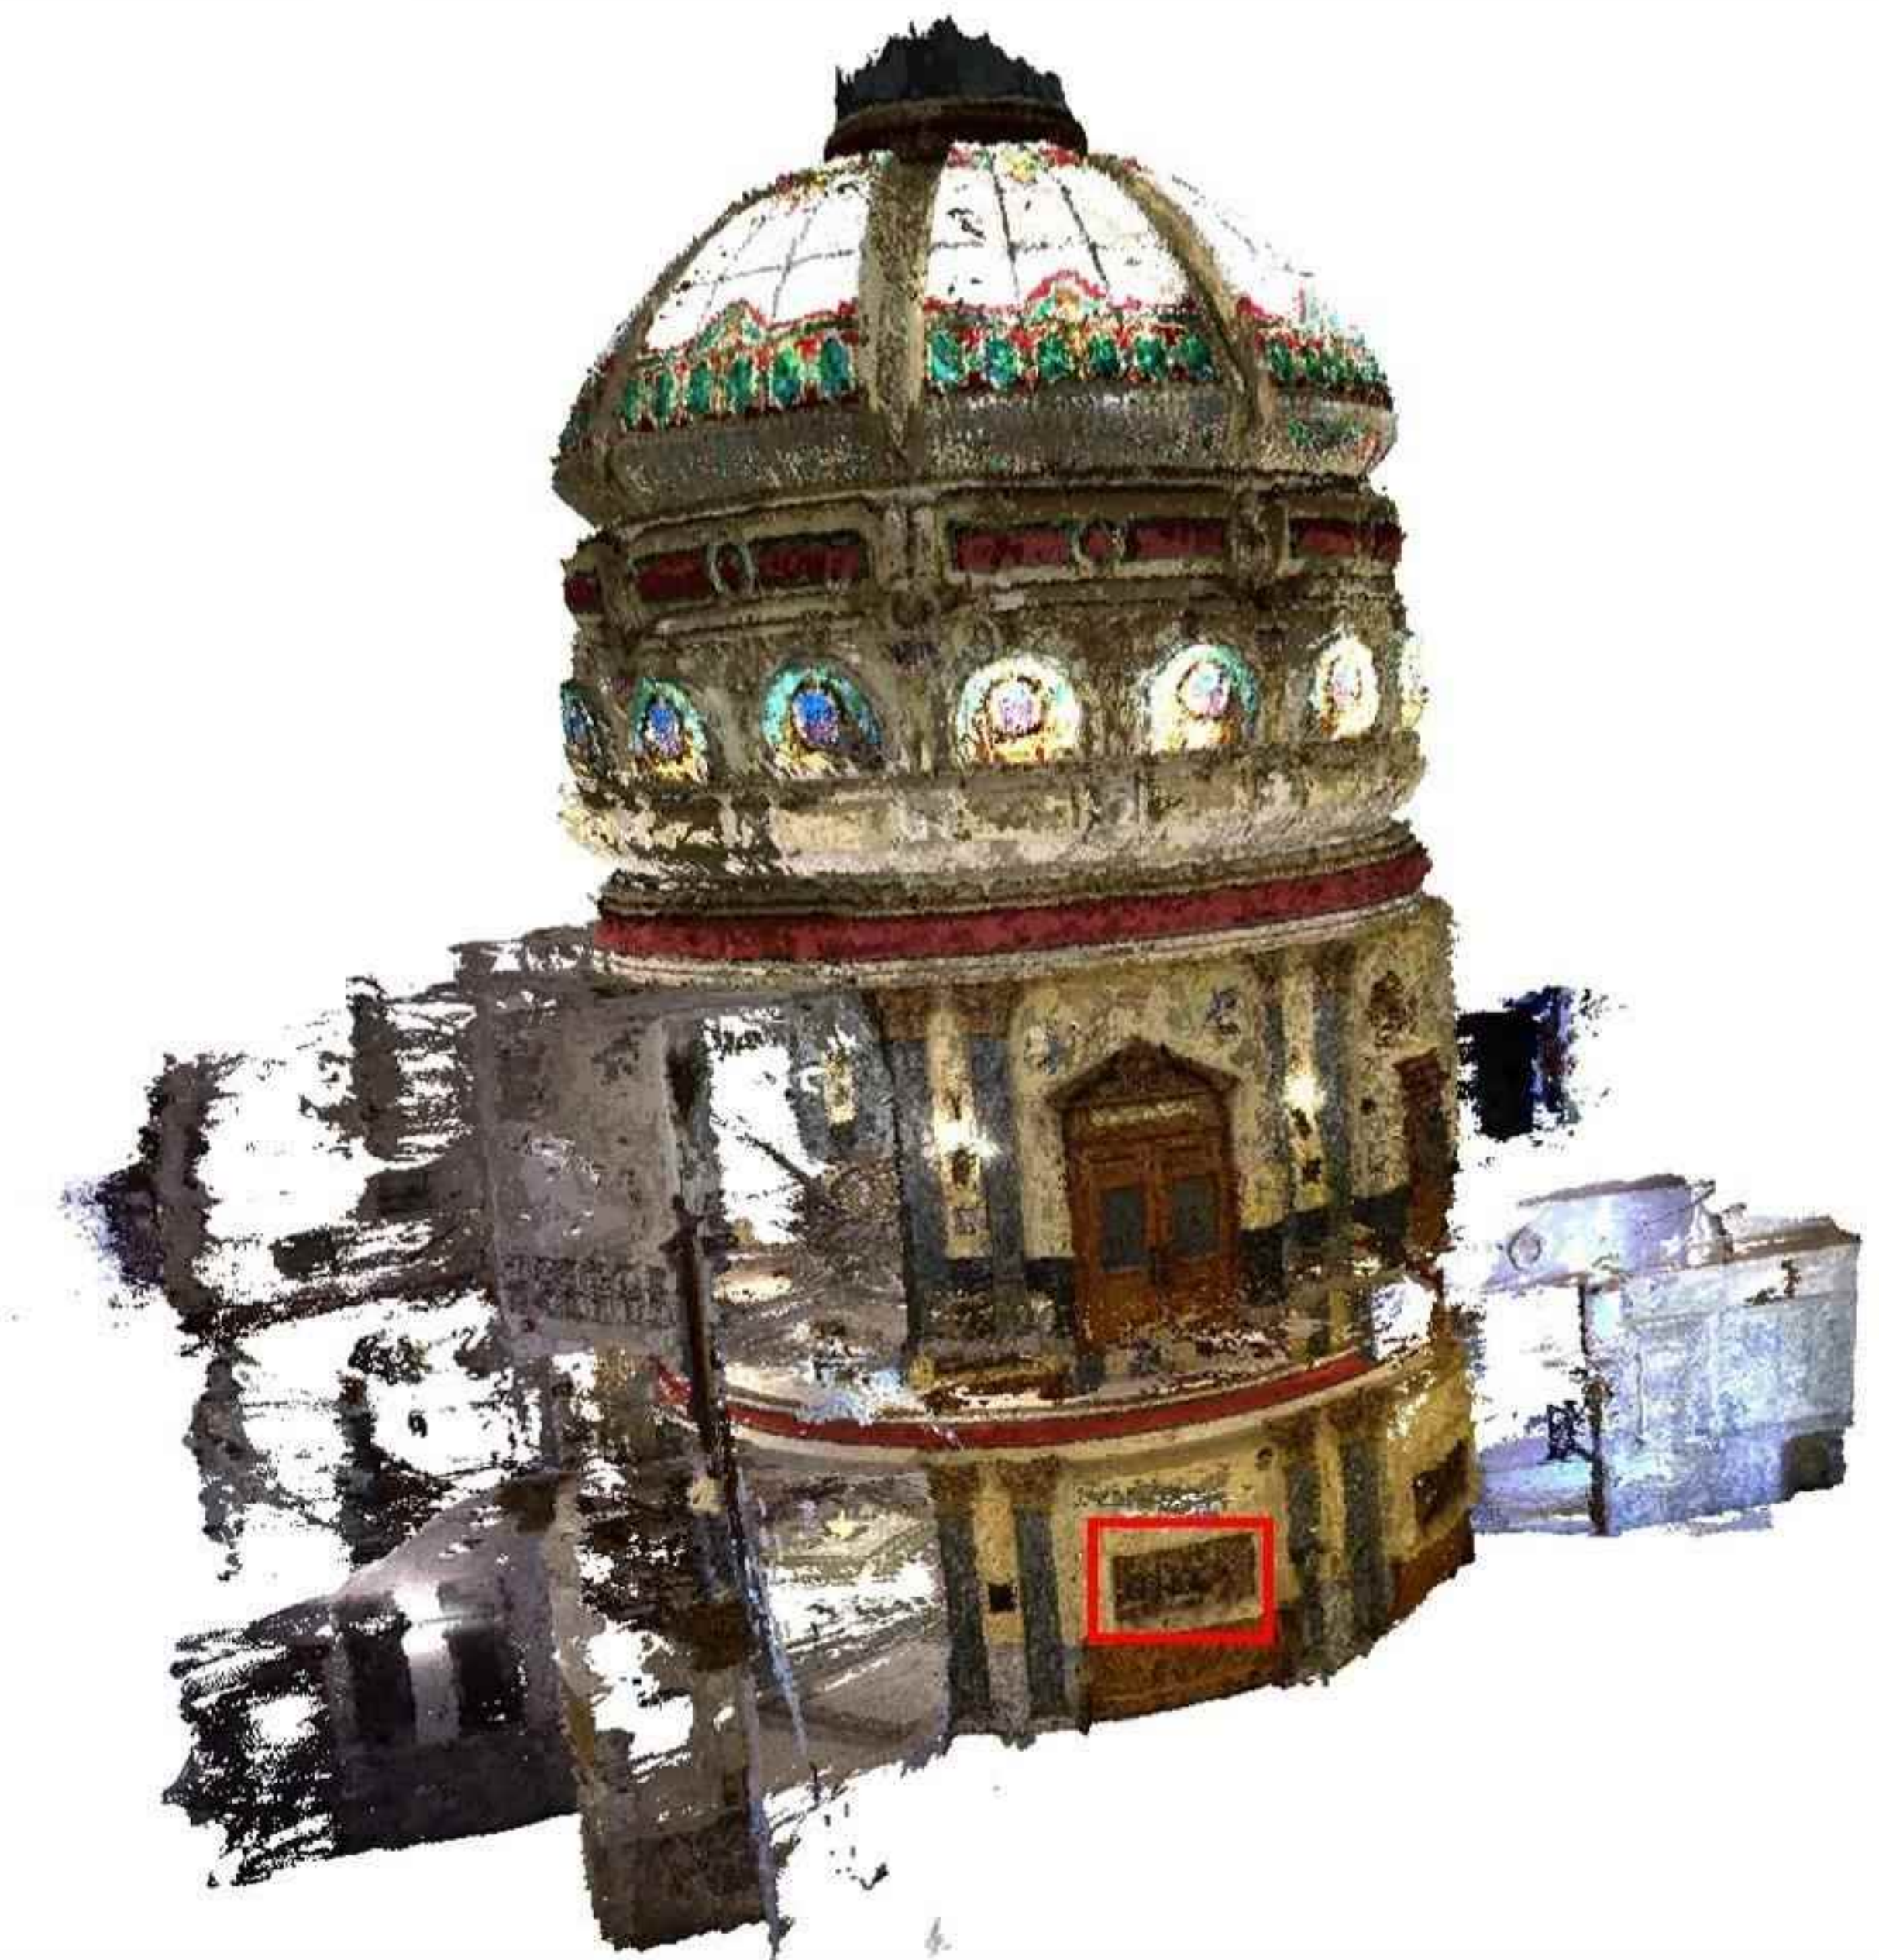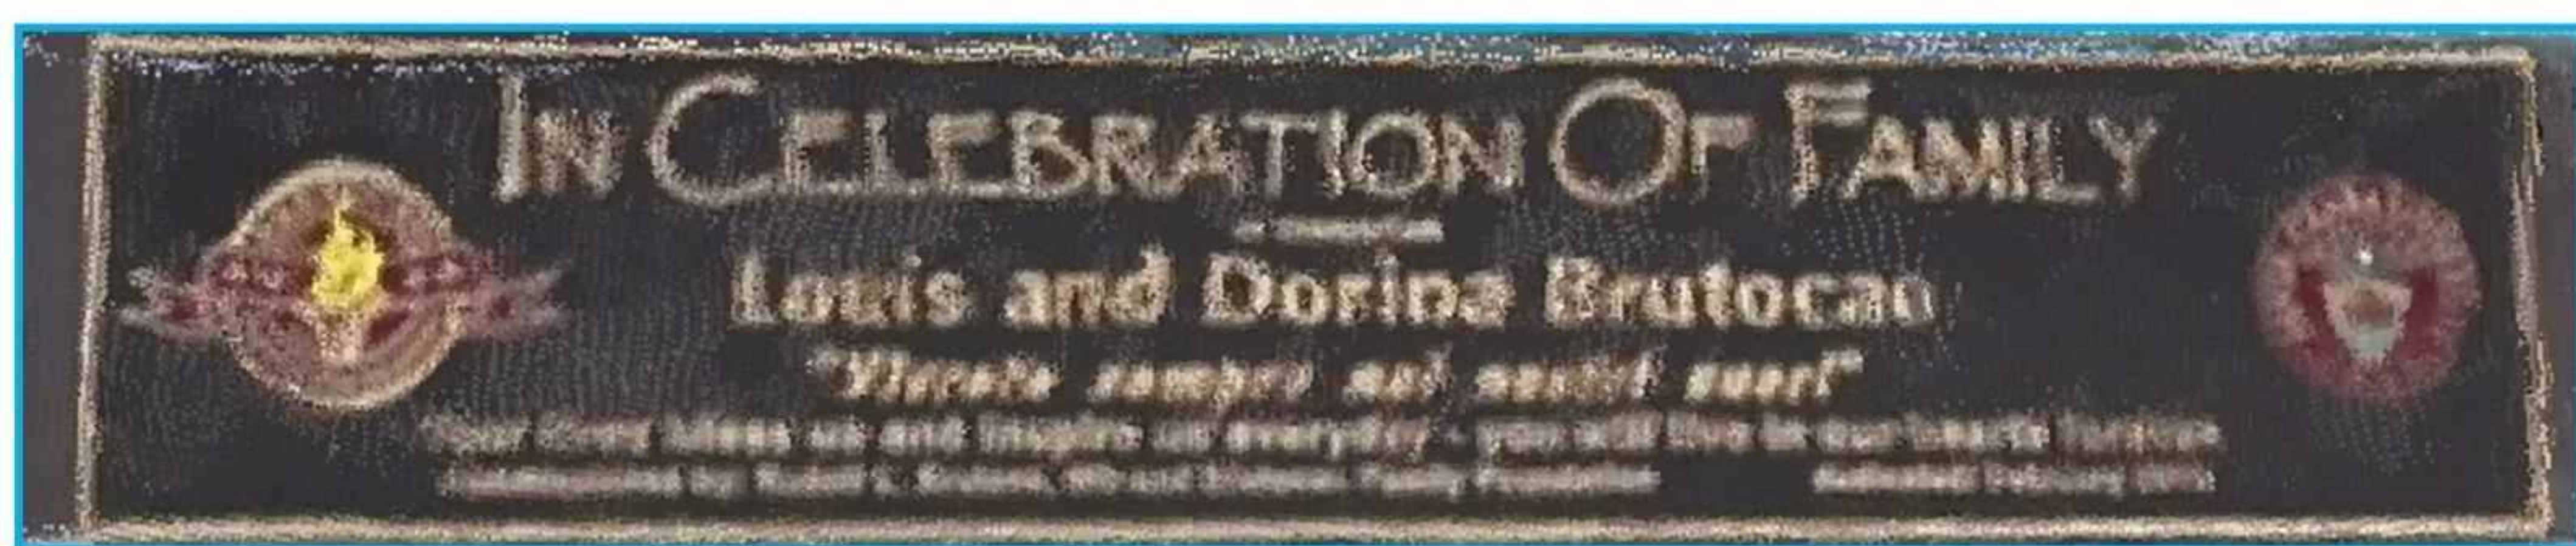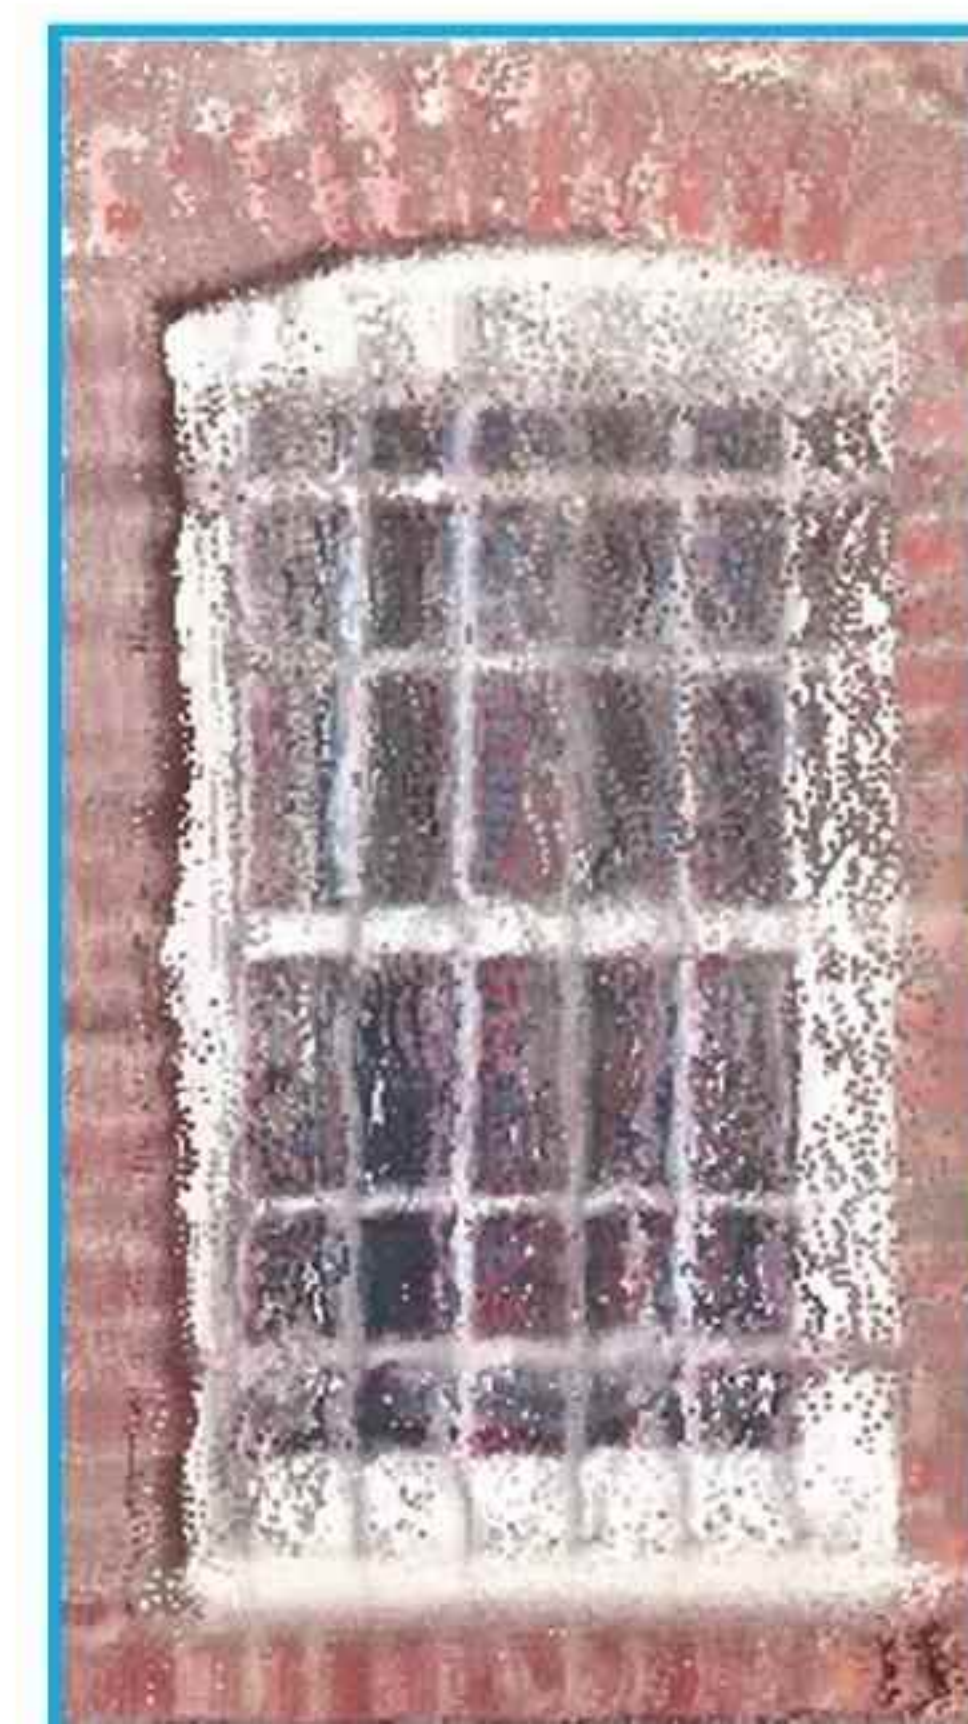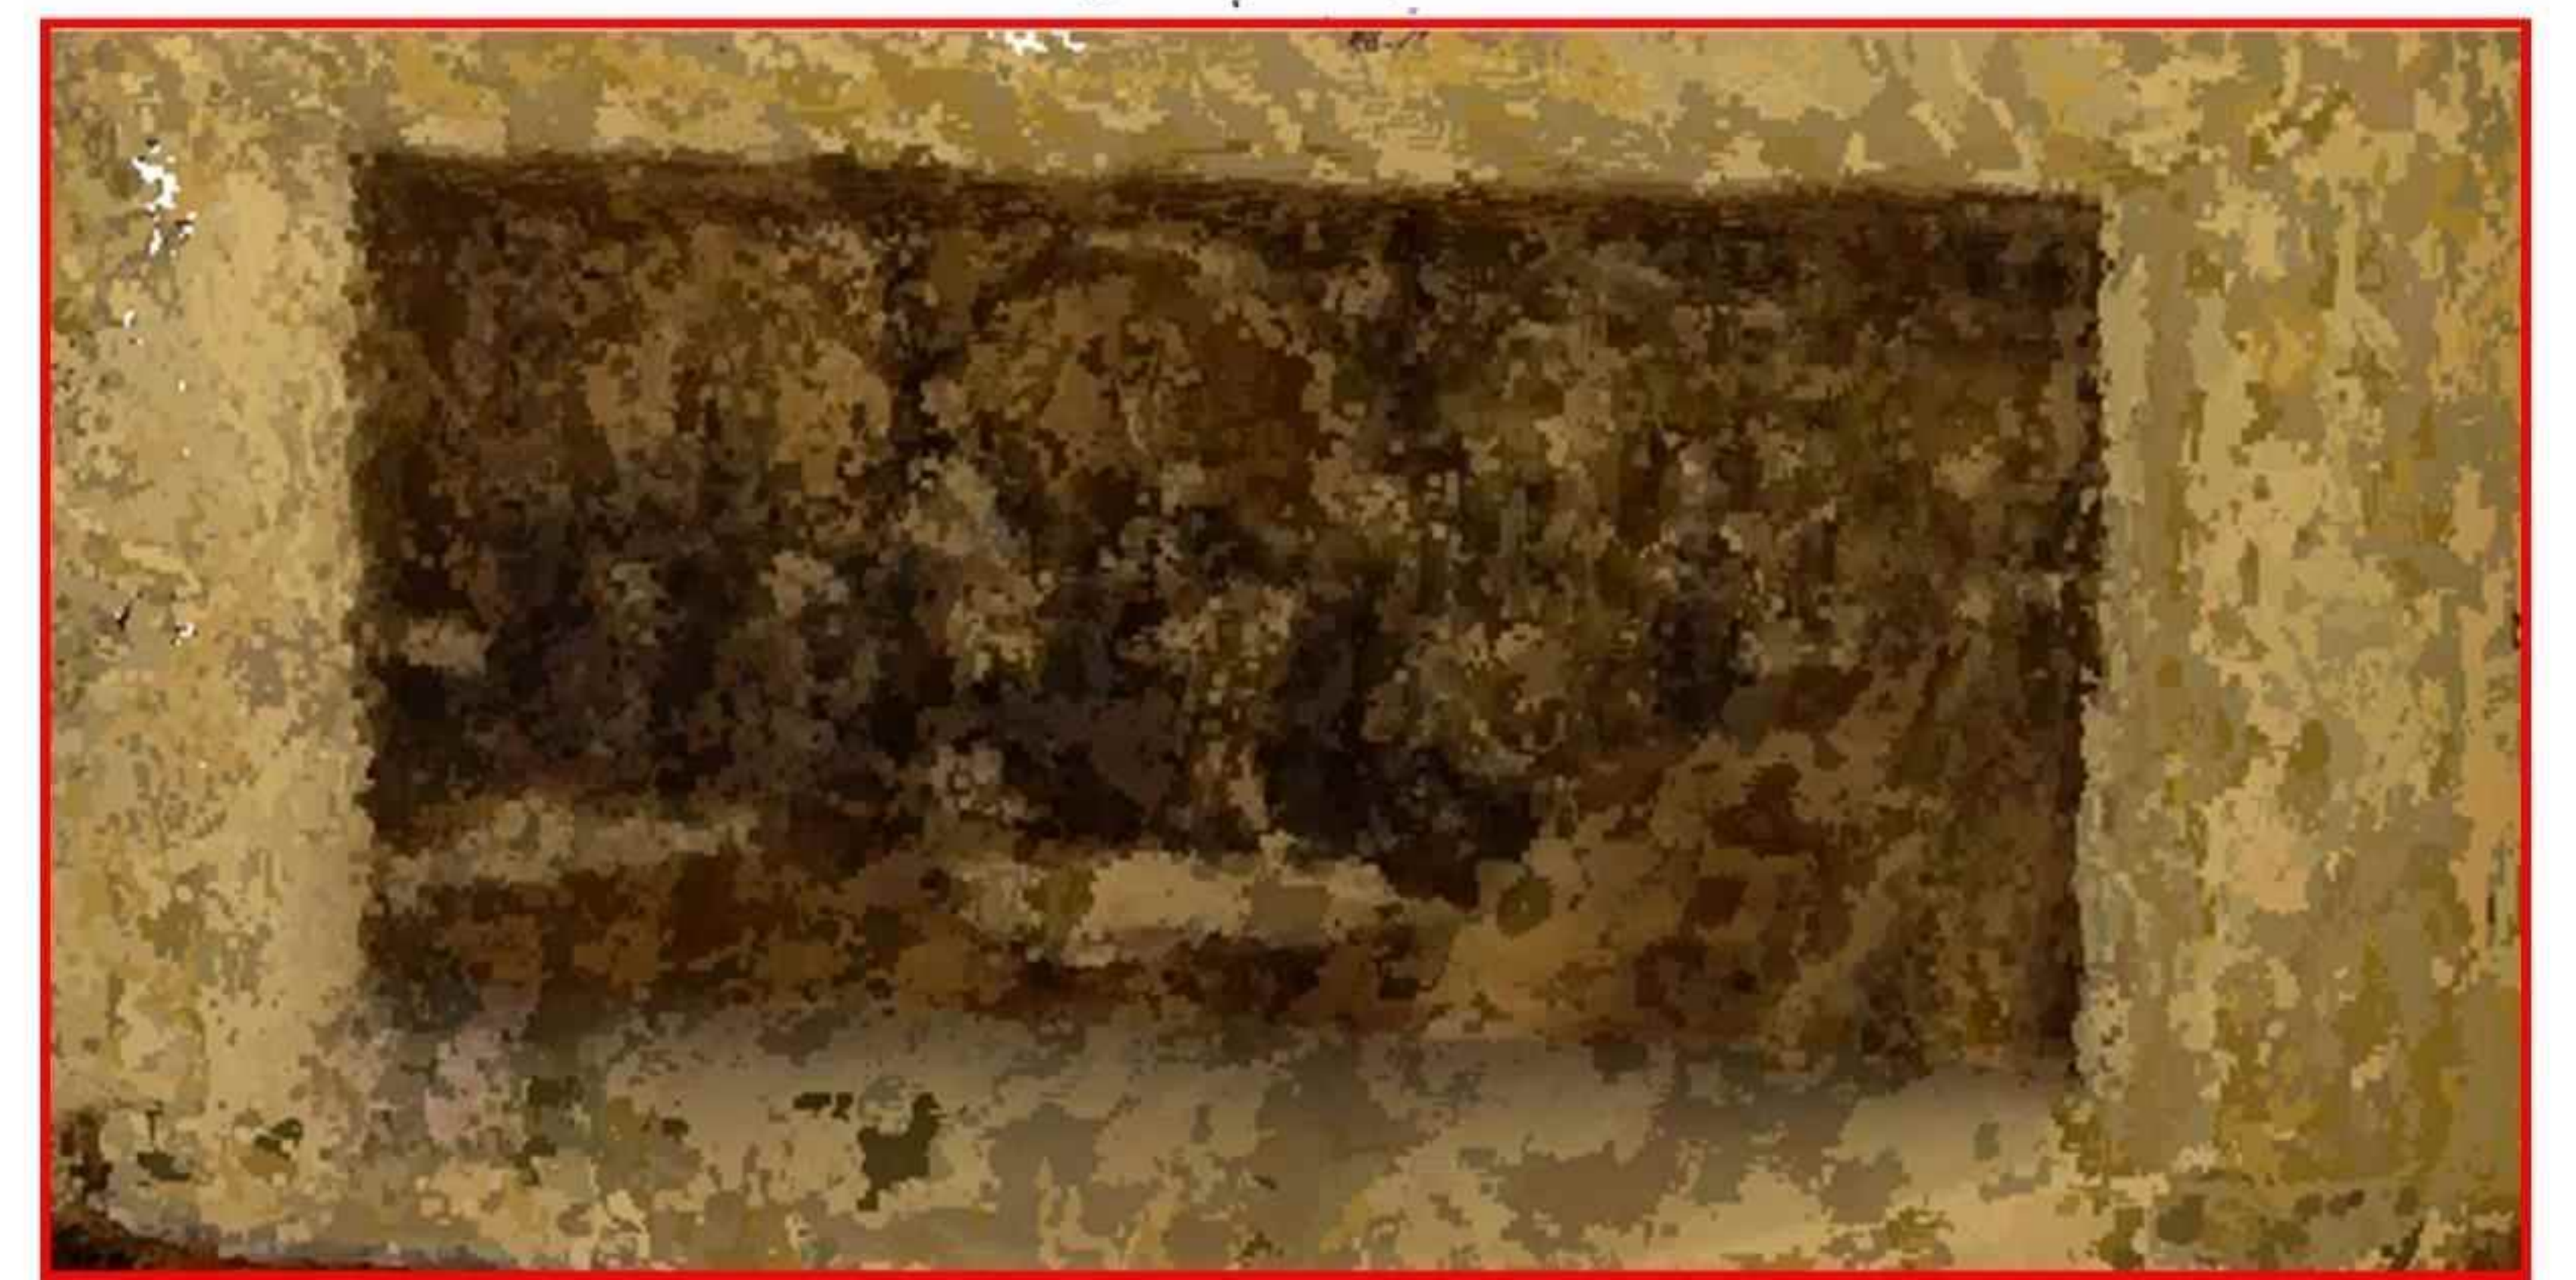

Supplement: Supplementary file 4 [file 136910649-supp.zip]
